# Supplementary material for: Structure and conformational analysis of spiroketals from 6-O-methyl-9(E)-hydroxyiminoerythronolide A
Source: publisher site journal article supplement (doi:10.3762/bjoc.11.157), 2015-08-19

**Compounds  
2, 3 and 4  
in the mixture  
CDCl<sub>3</sub>**

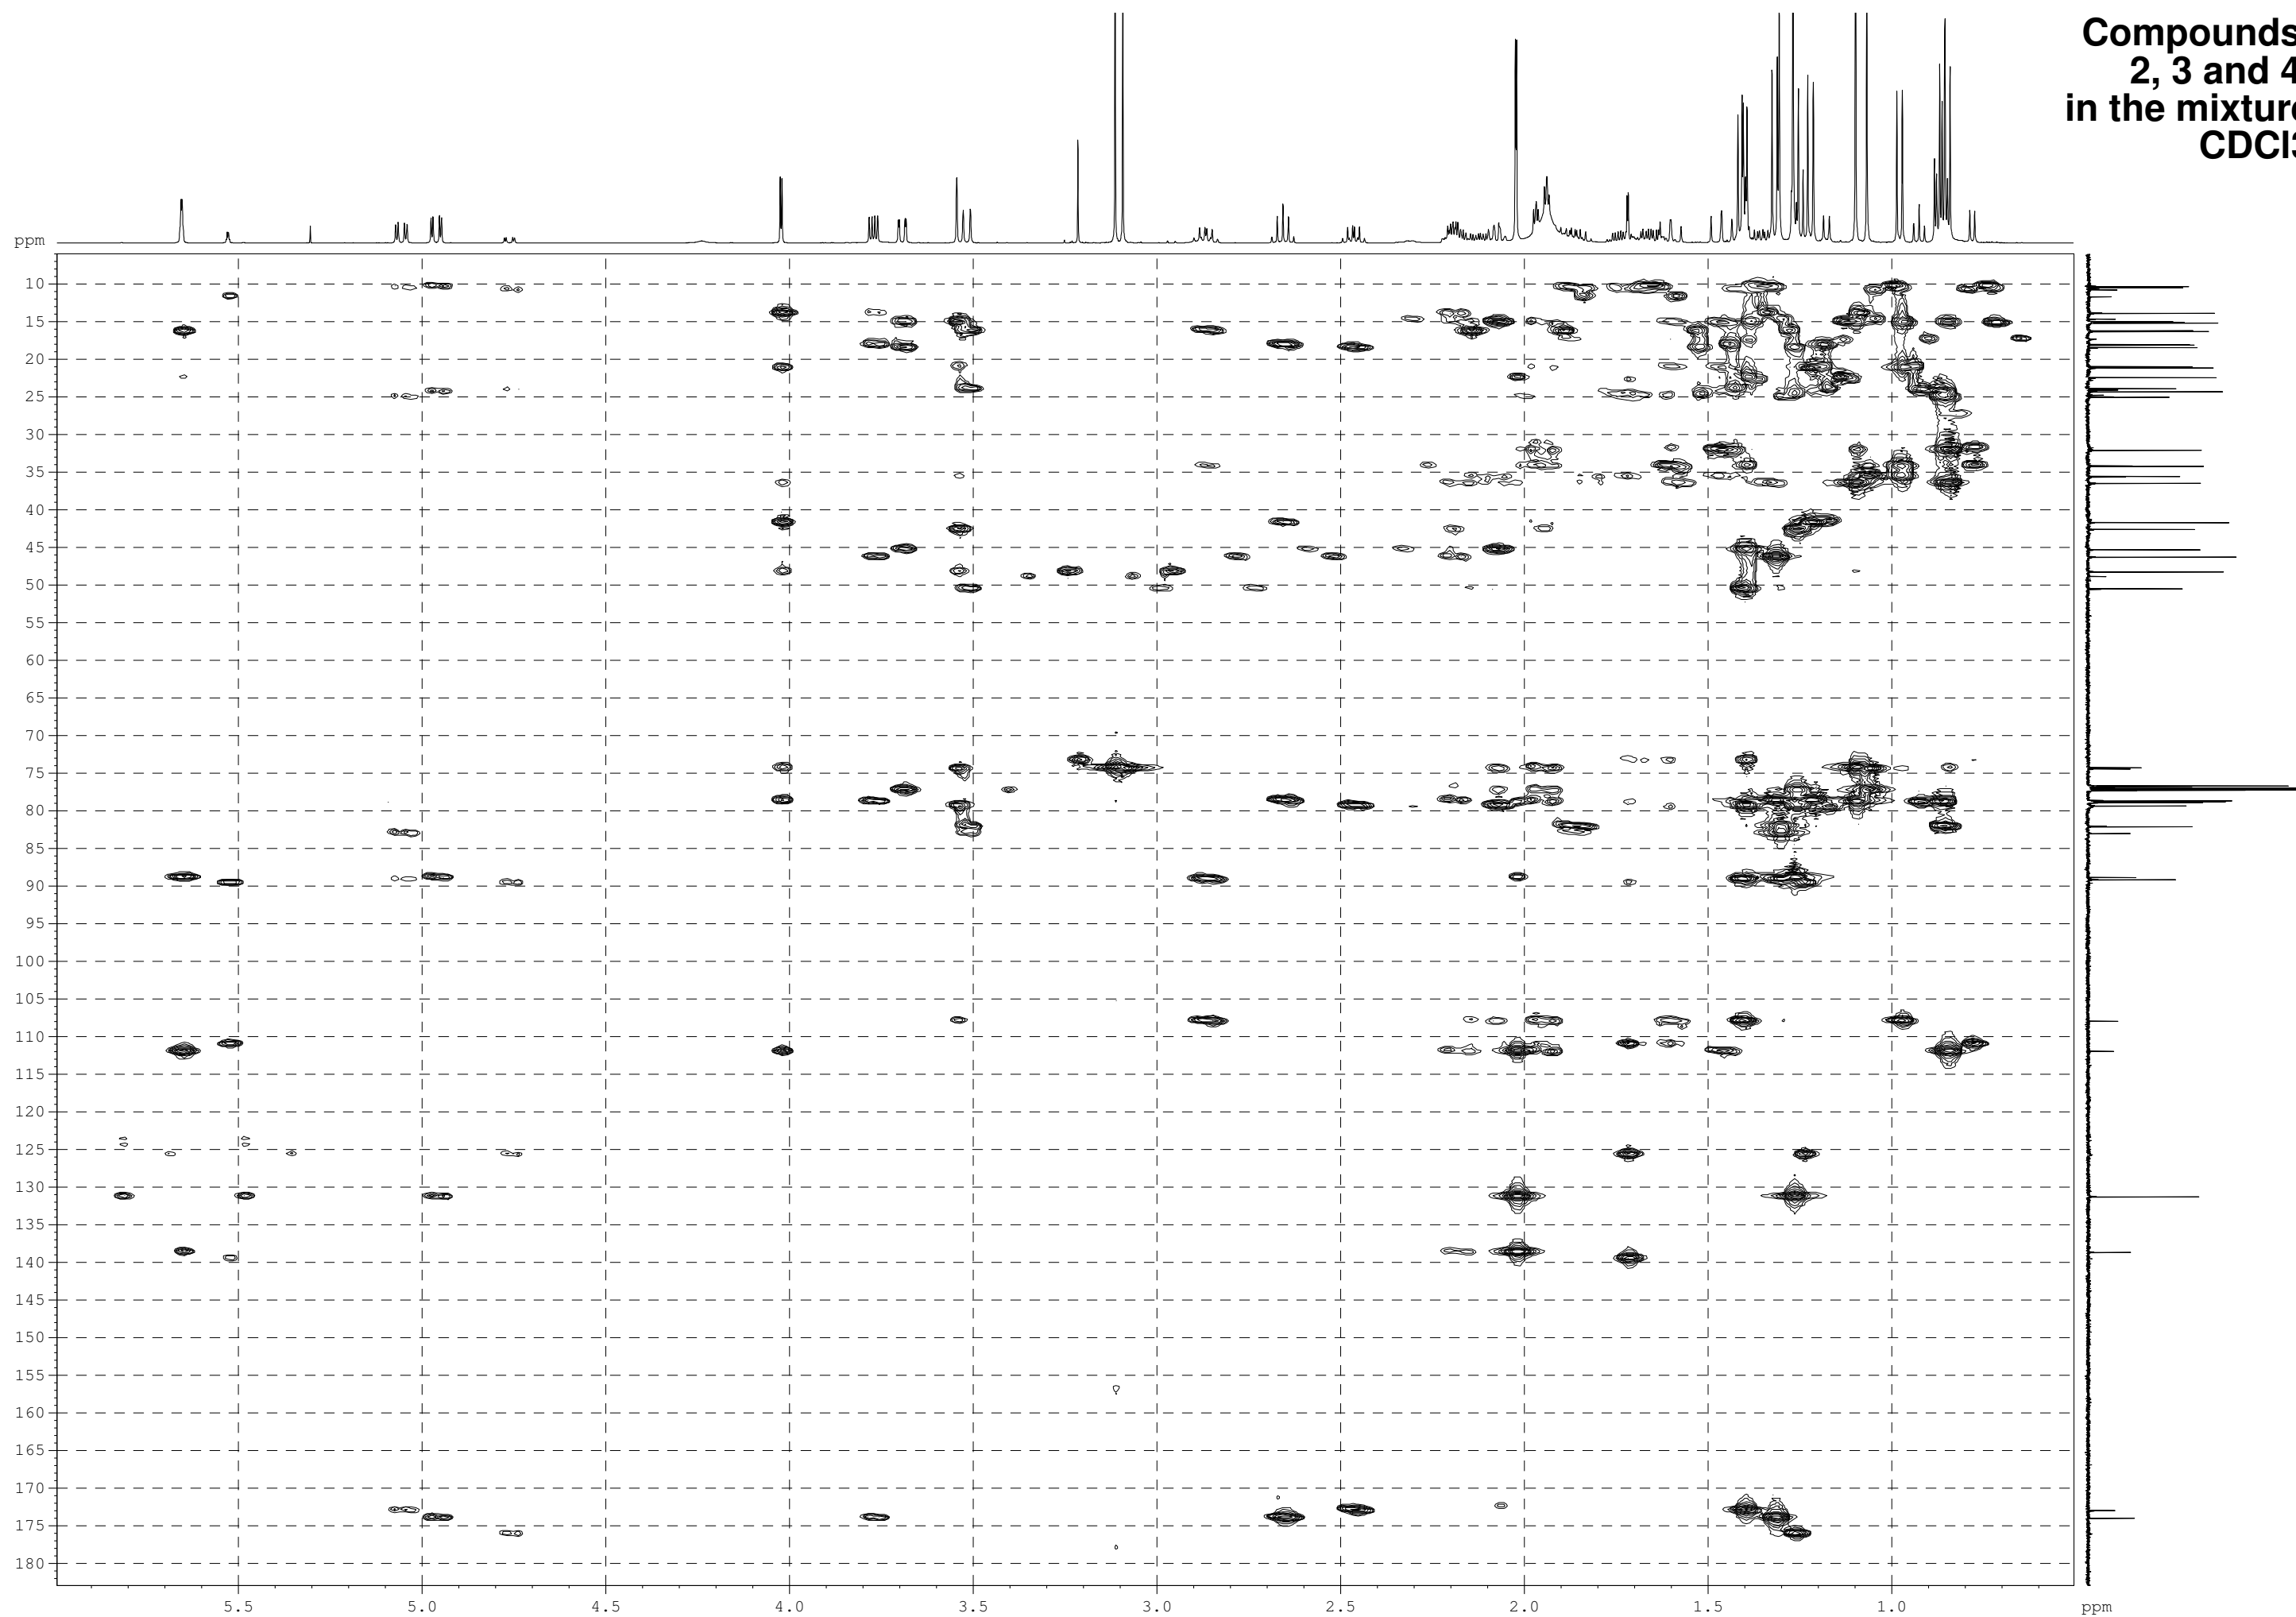

**Compounds  
2, 3 and 4  
in the mixture  
CDCl<sub>3</sub>**

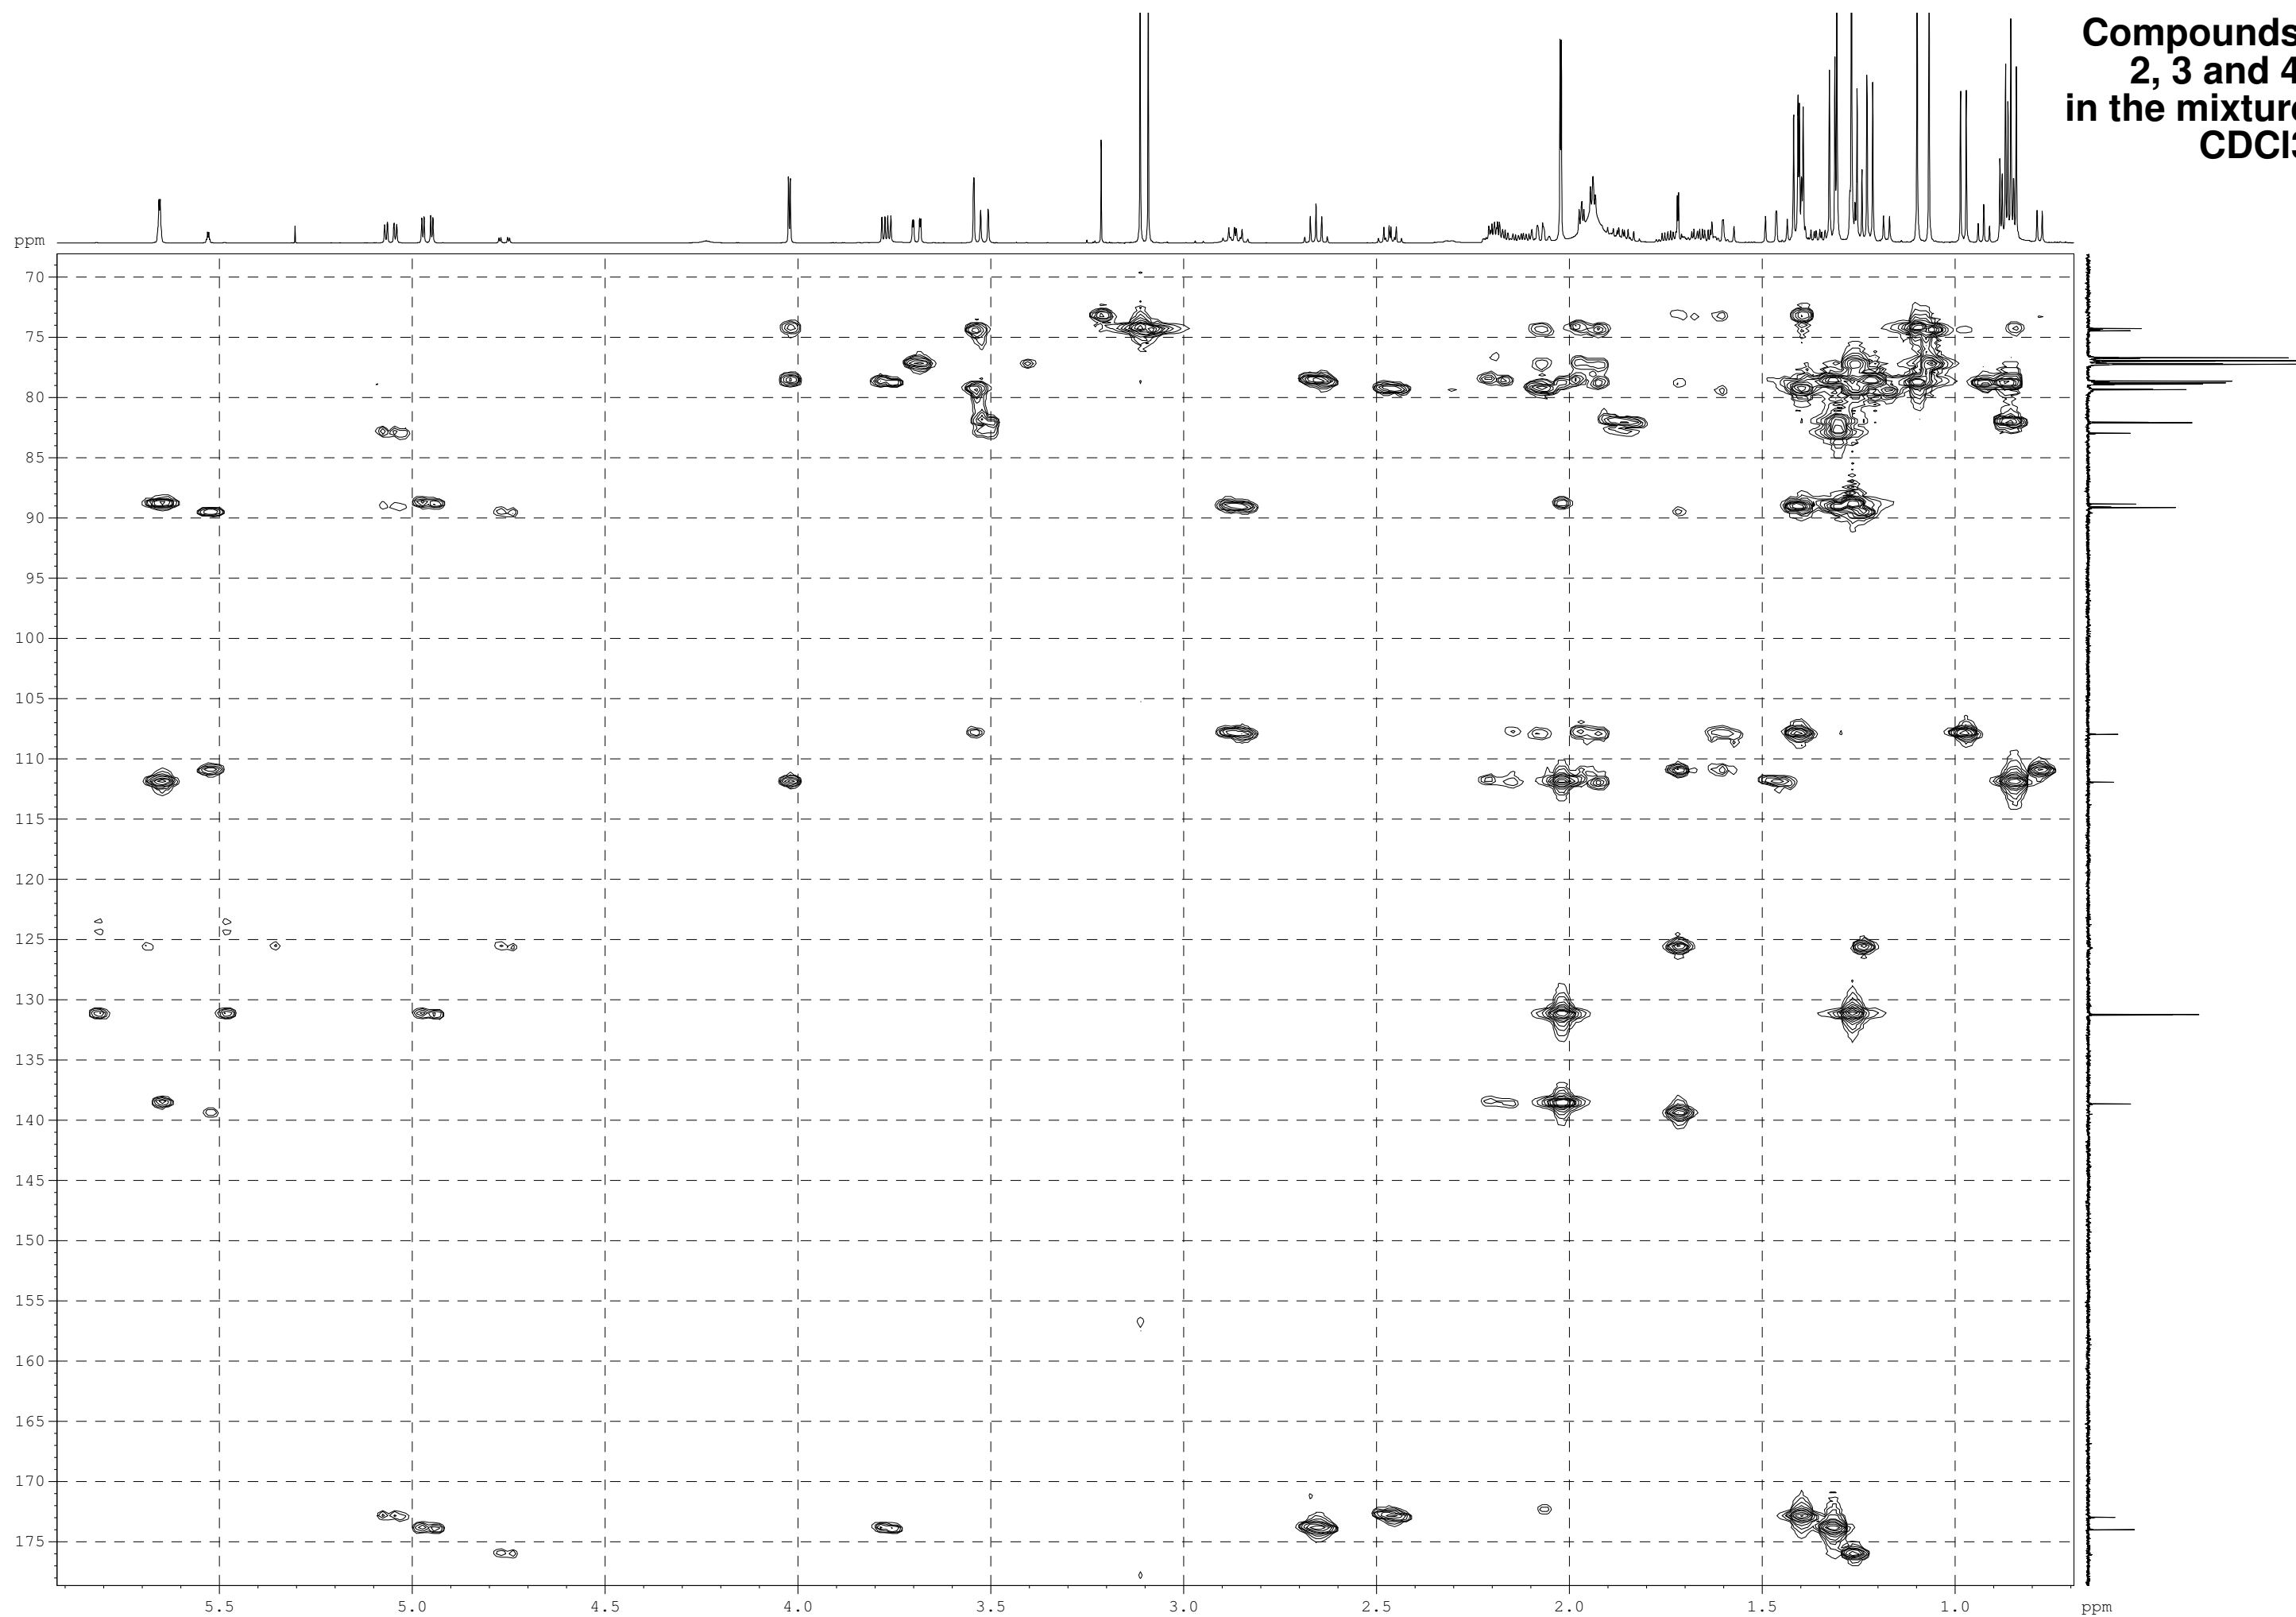

**Compounds  
2, 3 and 4  
in the mixture  
CDCl<sub>3</sub>**

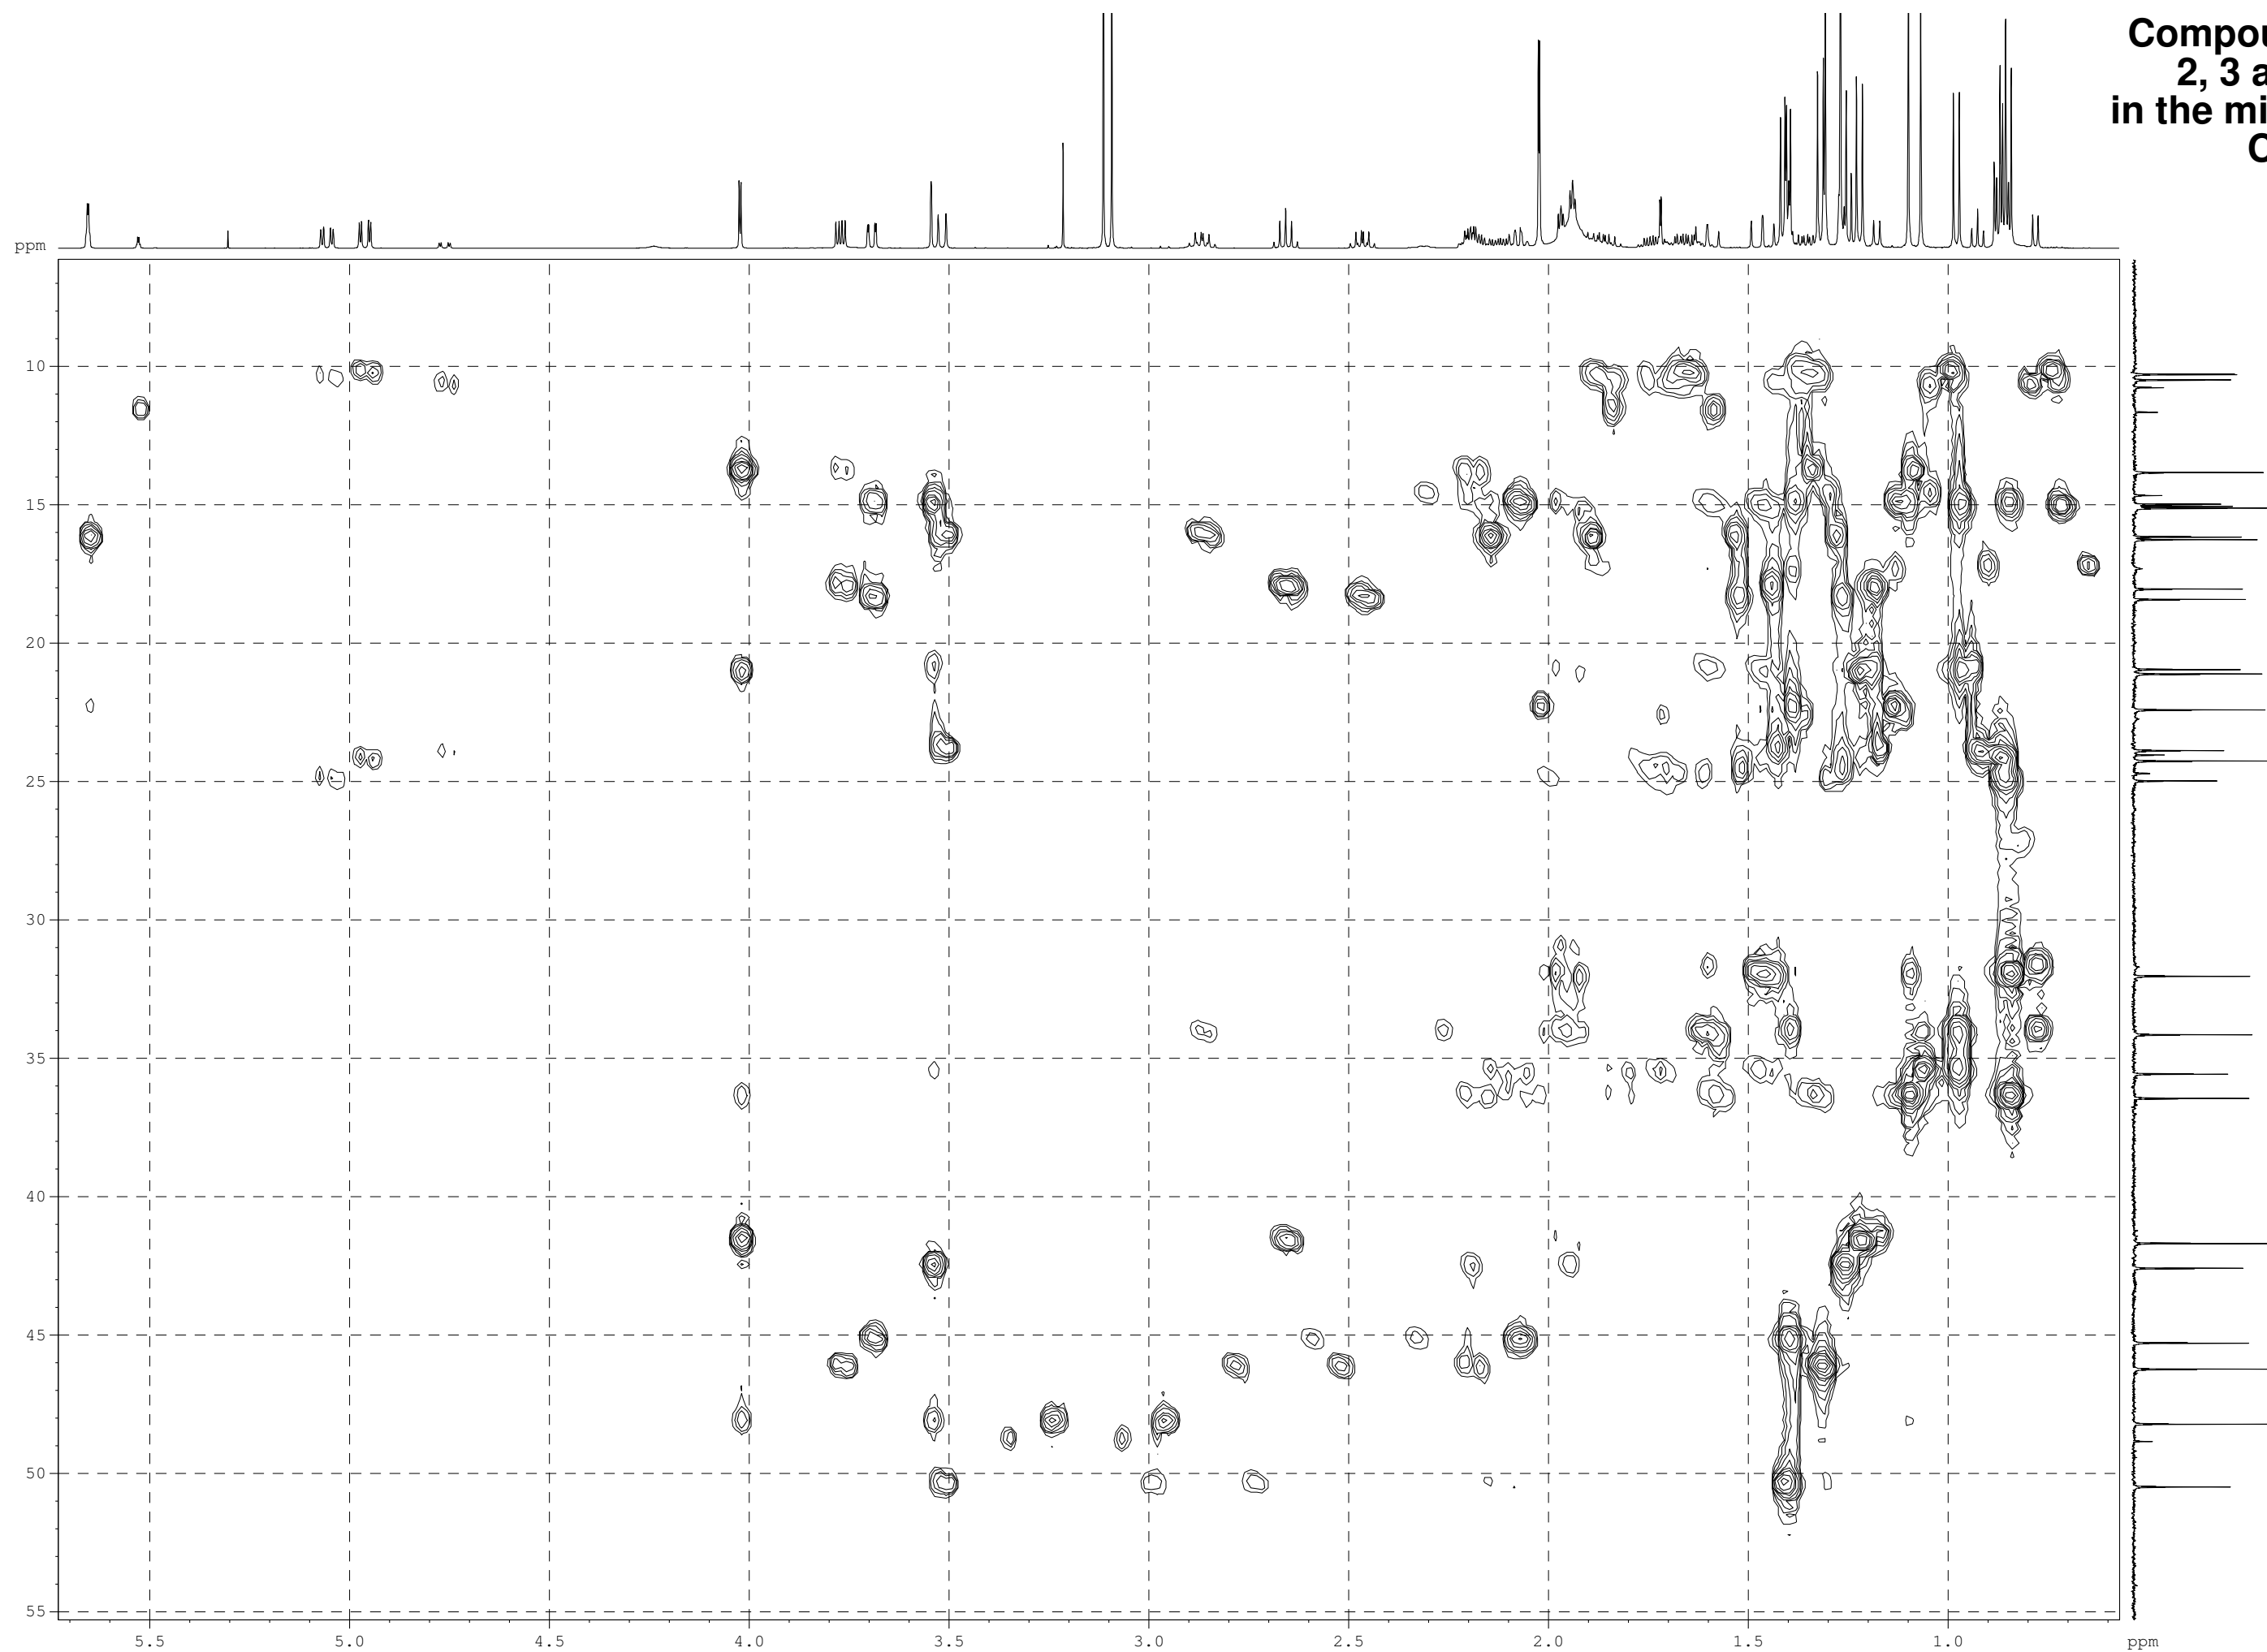

Supplement: Additional file 3 [file 1860-5397-11-157-S3.zip]
