# Supplementary material for: Structure and conformational analysis of spiroketals from 6-O-methyl-9(E)-hydroxyiminoerythronolide A
Source: publisher site journal article supplement (doi:10.3762/bjoc.11.157), 2015-08-19
Supplement: Additional file 3 [file list of nmr spectra.xlsx]

## Sheet: Sheet1
CPD	2 spiroketal	3 - normalni	4 - izvrnuti	smjesa
DMSO	IC108797156A1_b 147 (svi)	/	AC_N7124_19A1_dmso	/
CDCL3	IC108797_159A1_cdcl3_30mg (samo protonac)	AC_N7124-39-A1 i AC_N7124-39-A1_300_c	AC_N7124-39-A2 i AC_N7124-39-A2_300_c	14-02-2008_17 (svi)
NOESY DMSO	IC108797156A1_6414_b156 (2)	/	AC_N7124_19A1_dmso	/
NOESY CDCL3	IC108797159A1_6414_b166 (3)	AC_N7124-39-A1 (20)	AC_N7124-19-A1 i AC_N7124-39-A2 - oba su užasna	14-02-2008_17 (35)
	13C u kloroformu je izvučen iz spektara smjese		NOESY u CDCl3 je bio užasan, pa smo snimili u DMSO, bolji
			dosta peakova u CDCl3 su bili broad
