# Supplementary figures and images for: Structure and conformational analysis of spiroketals from 6-O-methyl-9(E)-hydroxyiminoerythronolide A
Source: publisher site journal article supplement (doi:10.3762/bjoc.11.157), 2015-08-19

Compound 3  
CDCl3

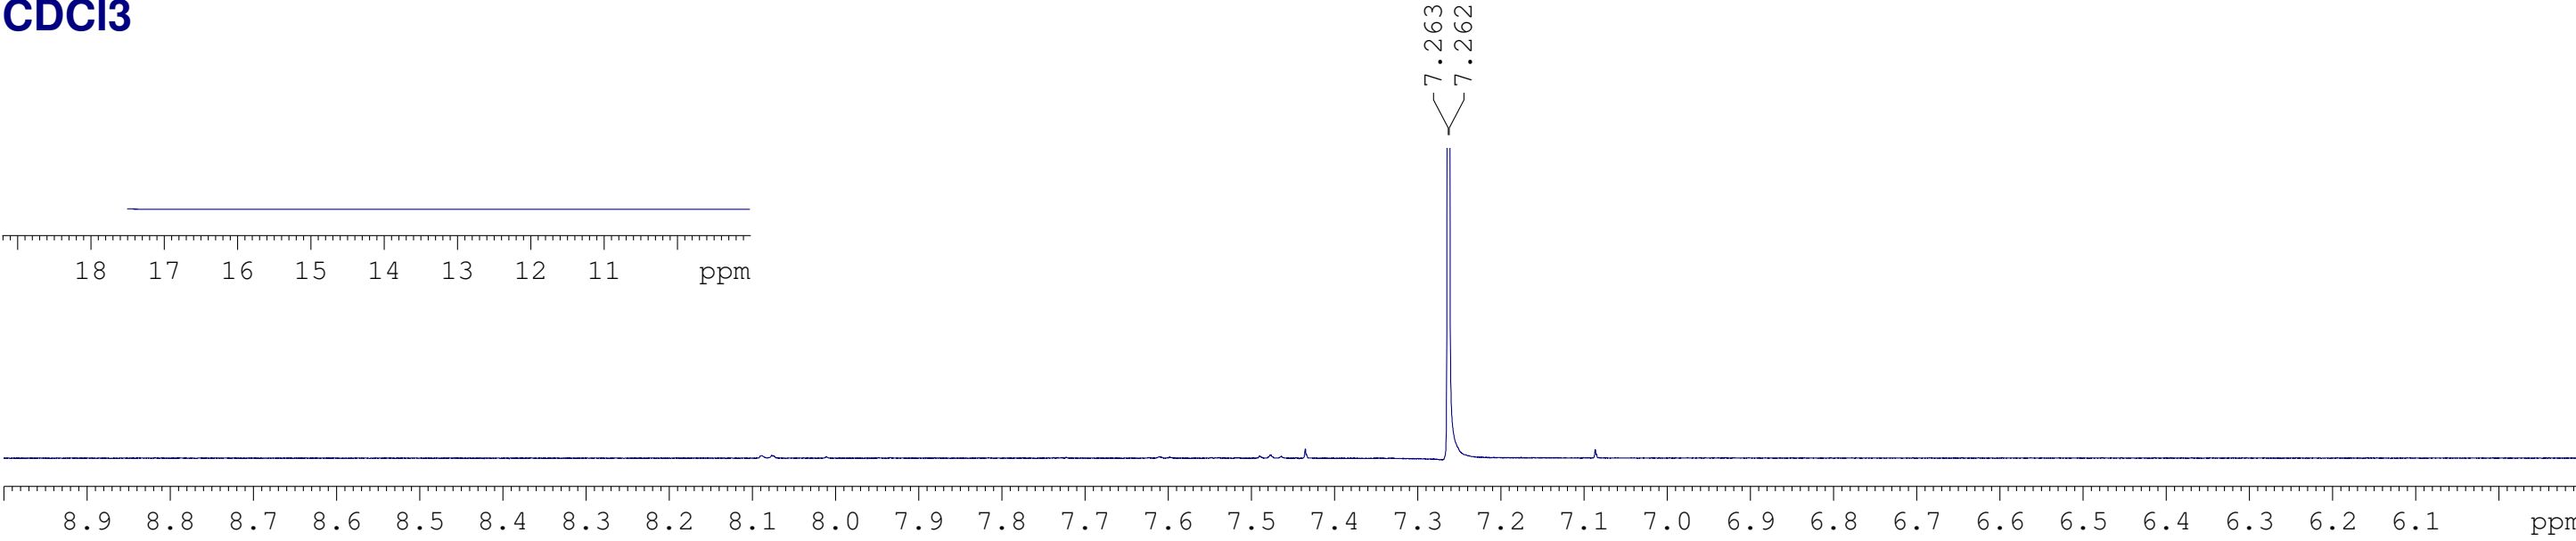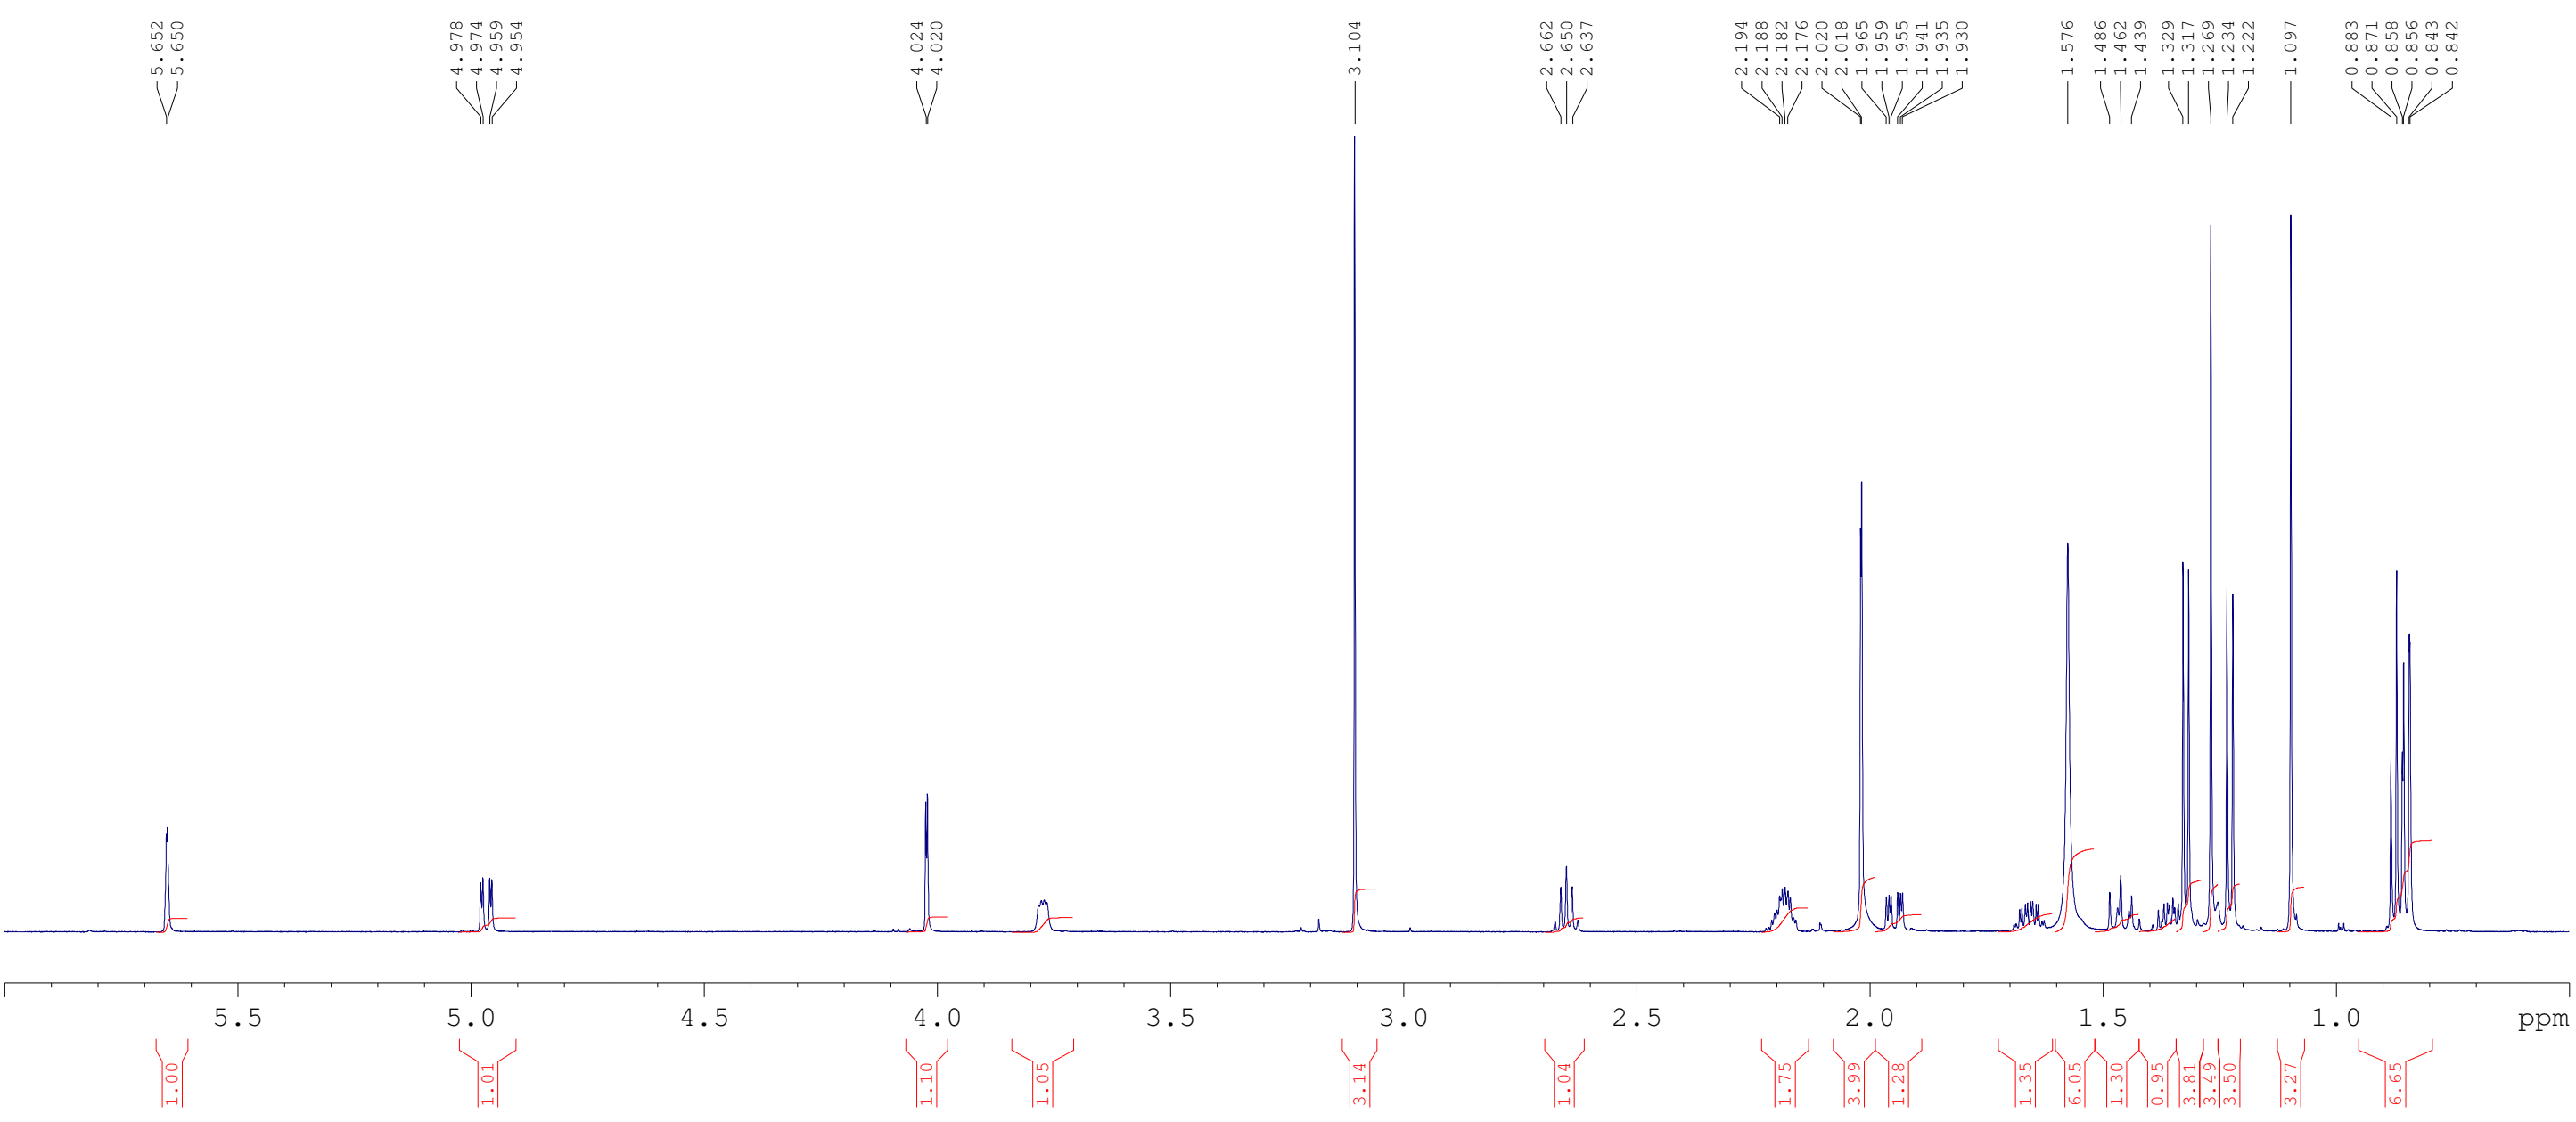

Supplement: Additional file 3 [file 1860-5397-11-157-S3.zip]

Compound 2  
CDCl<sub>3</sub>

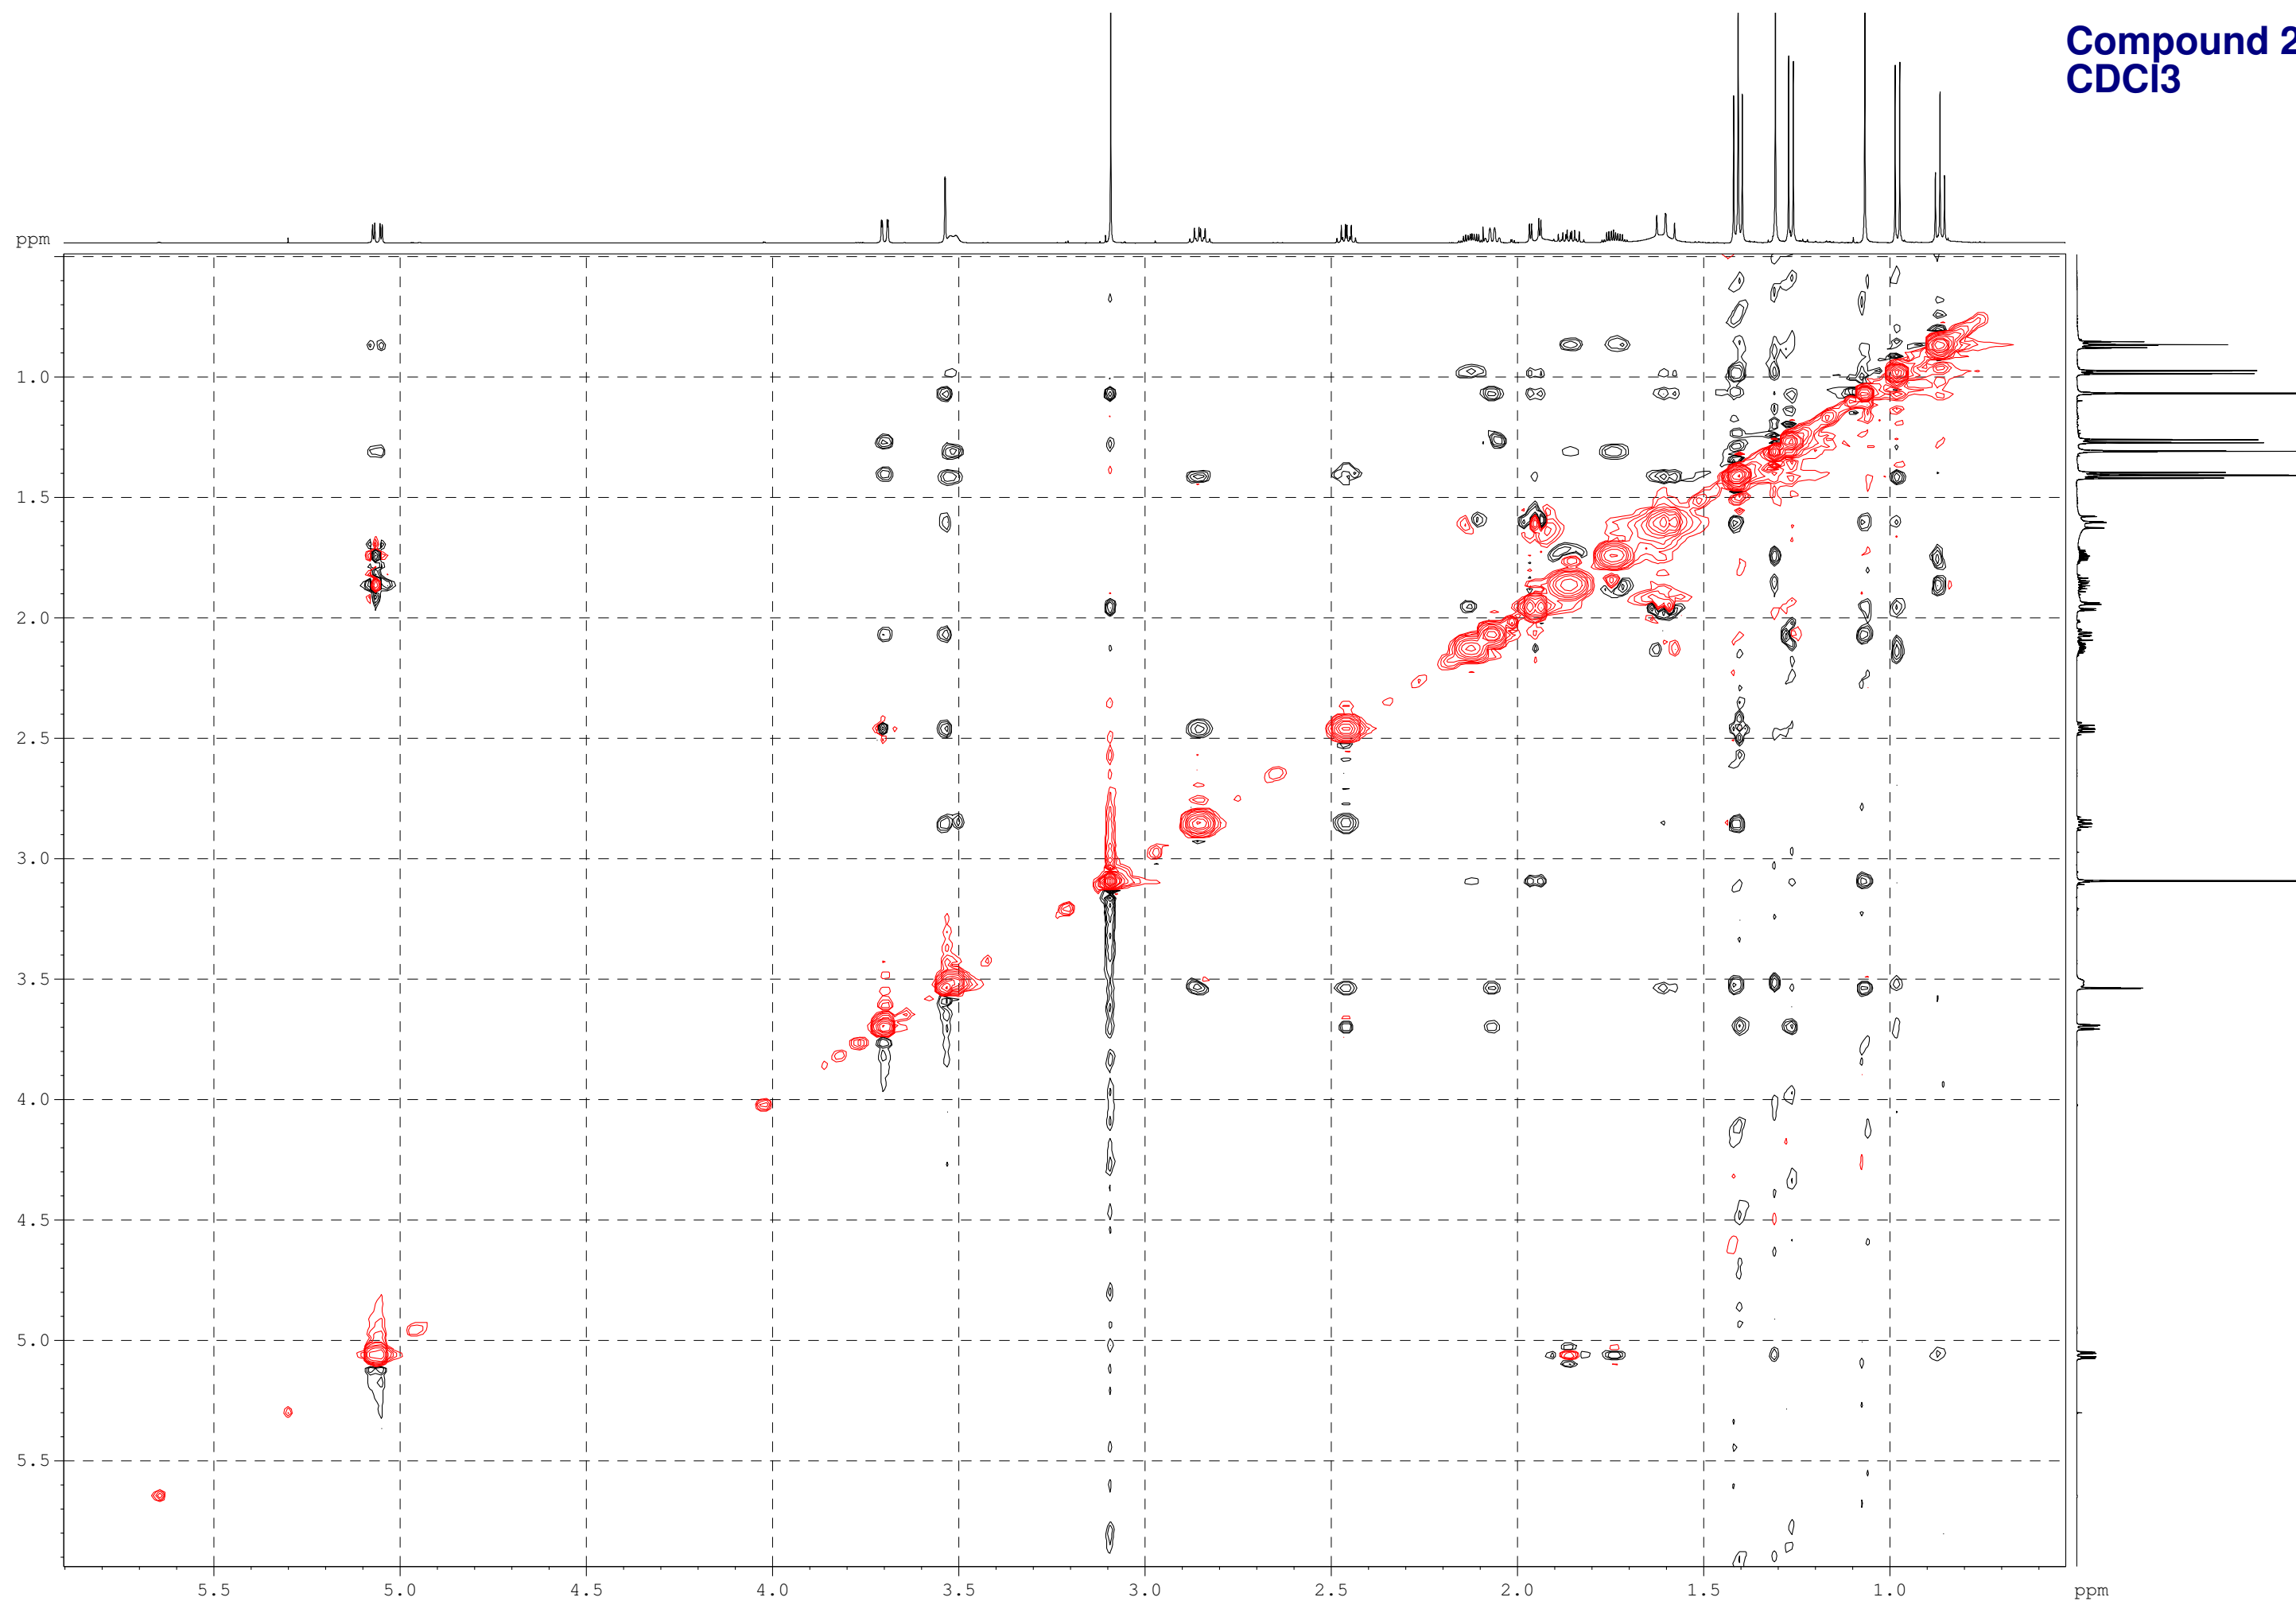

Supplement: Additional file 3 [file 1860-5397-11-157-S3.zip]

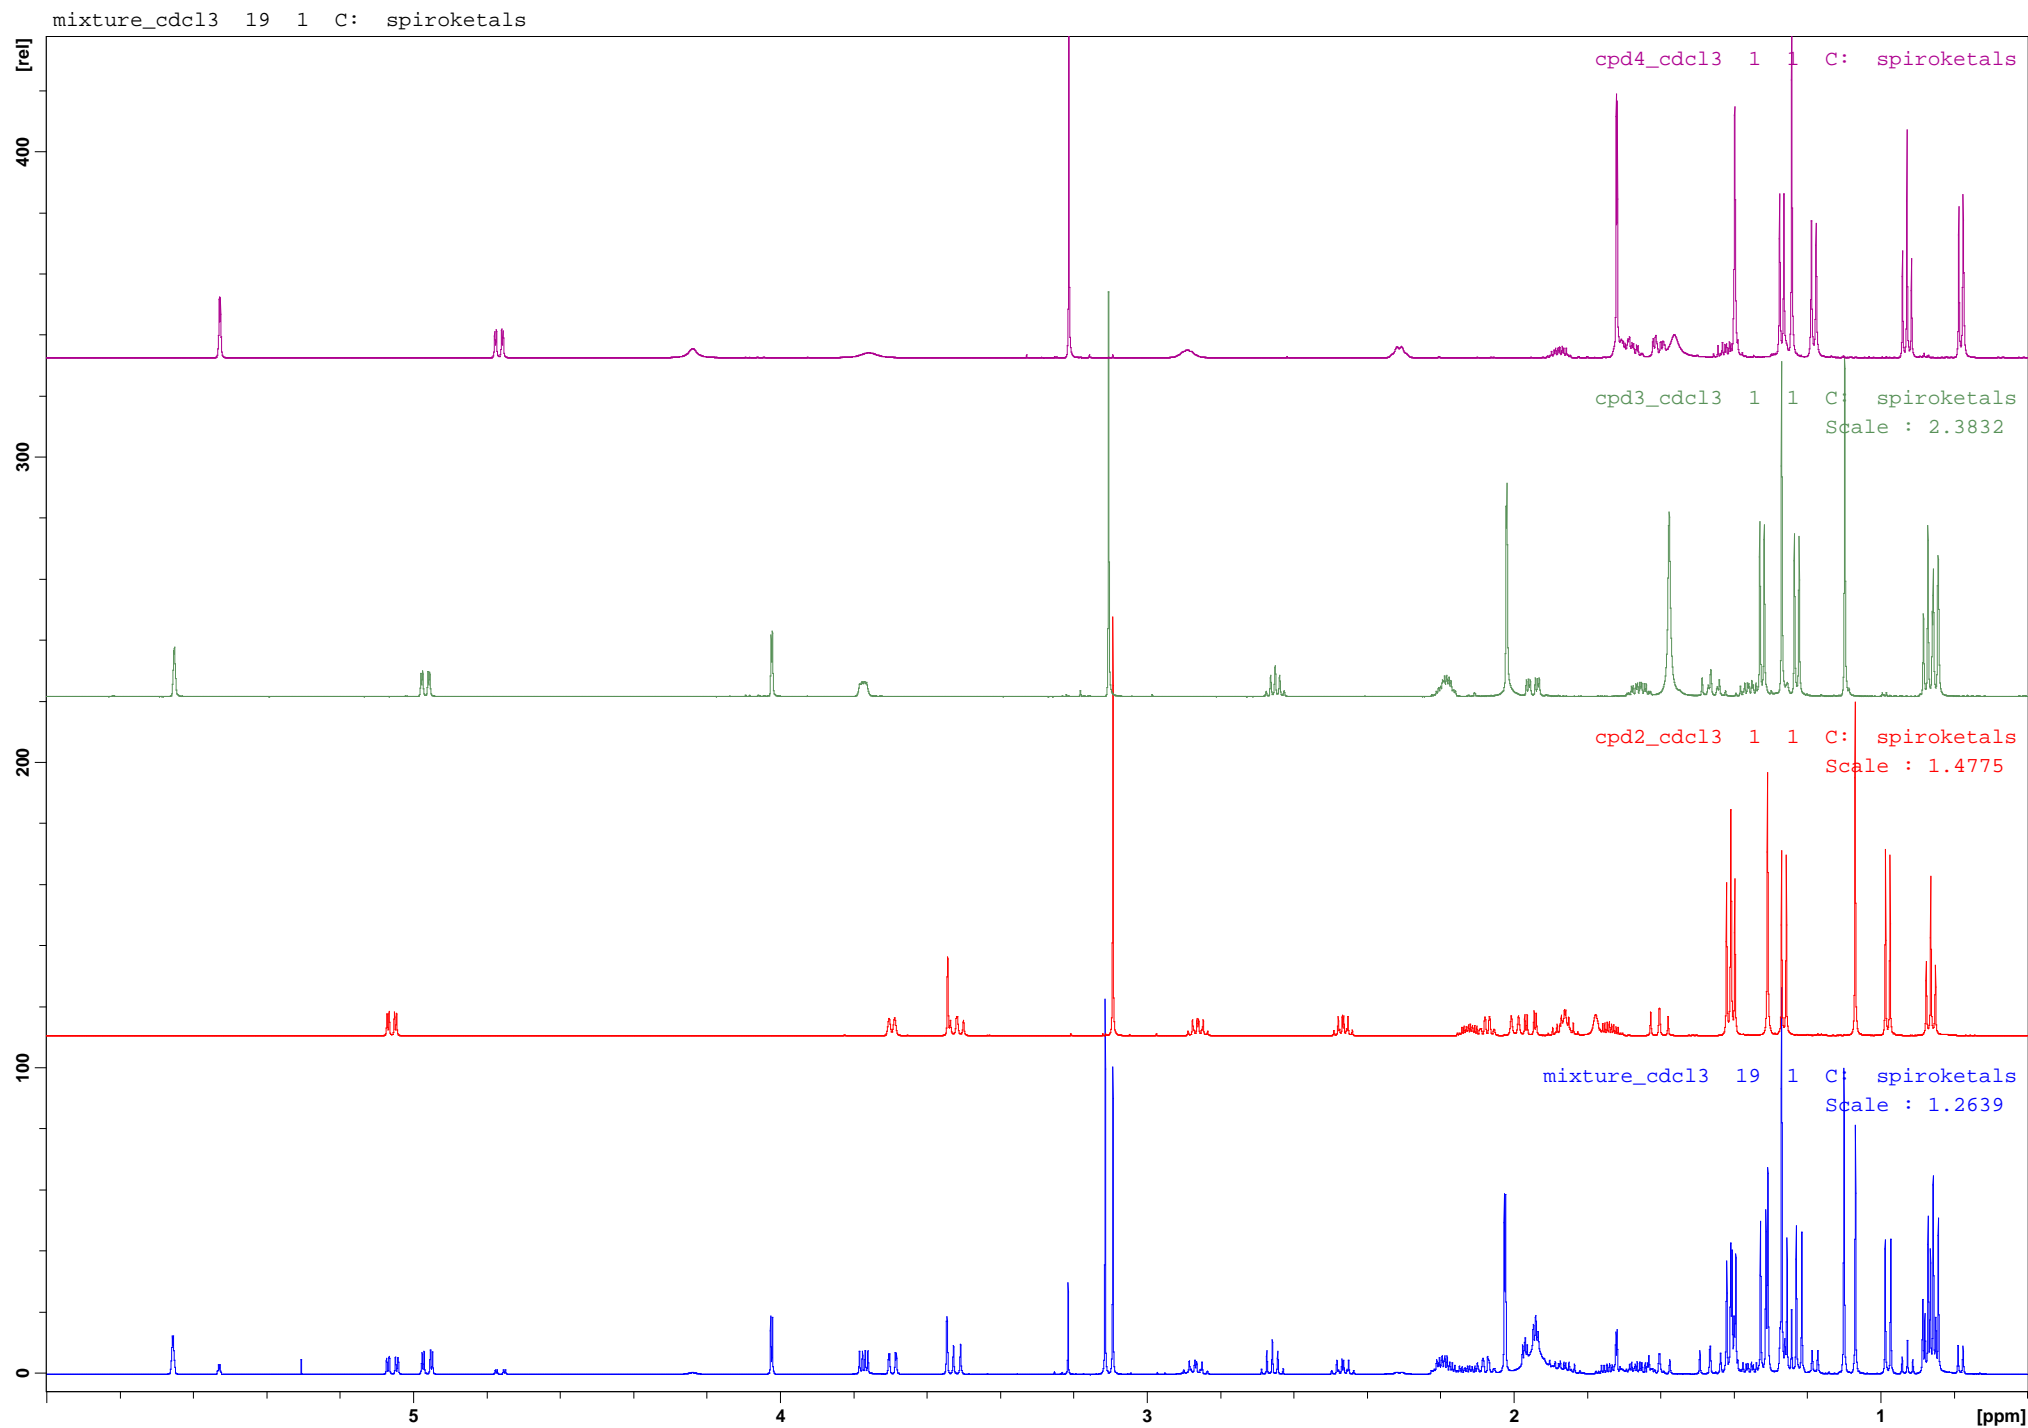

Supplement: Additional file 3 [file 1860-5397-11-157-S3.zip]

Compound 2  
DMSO

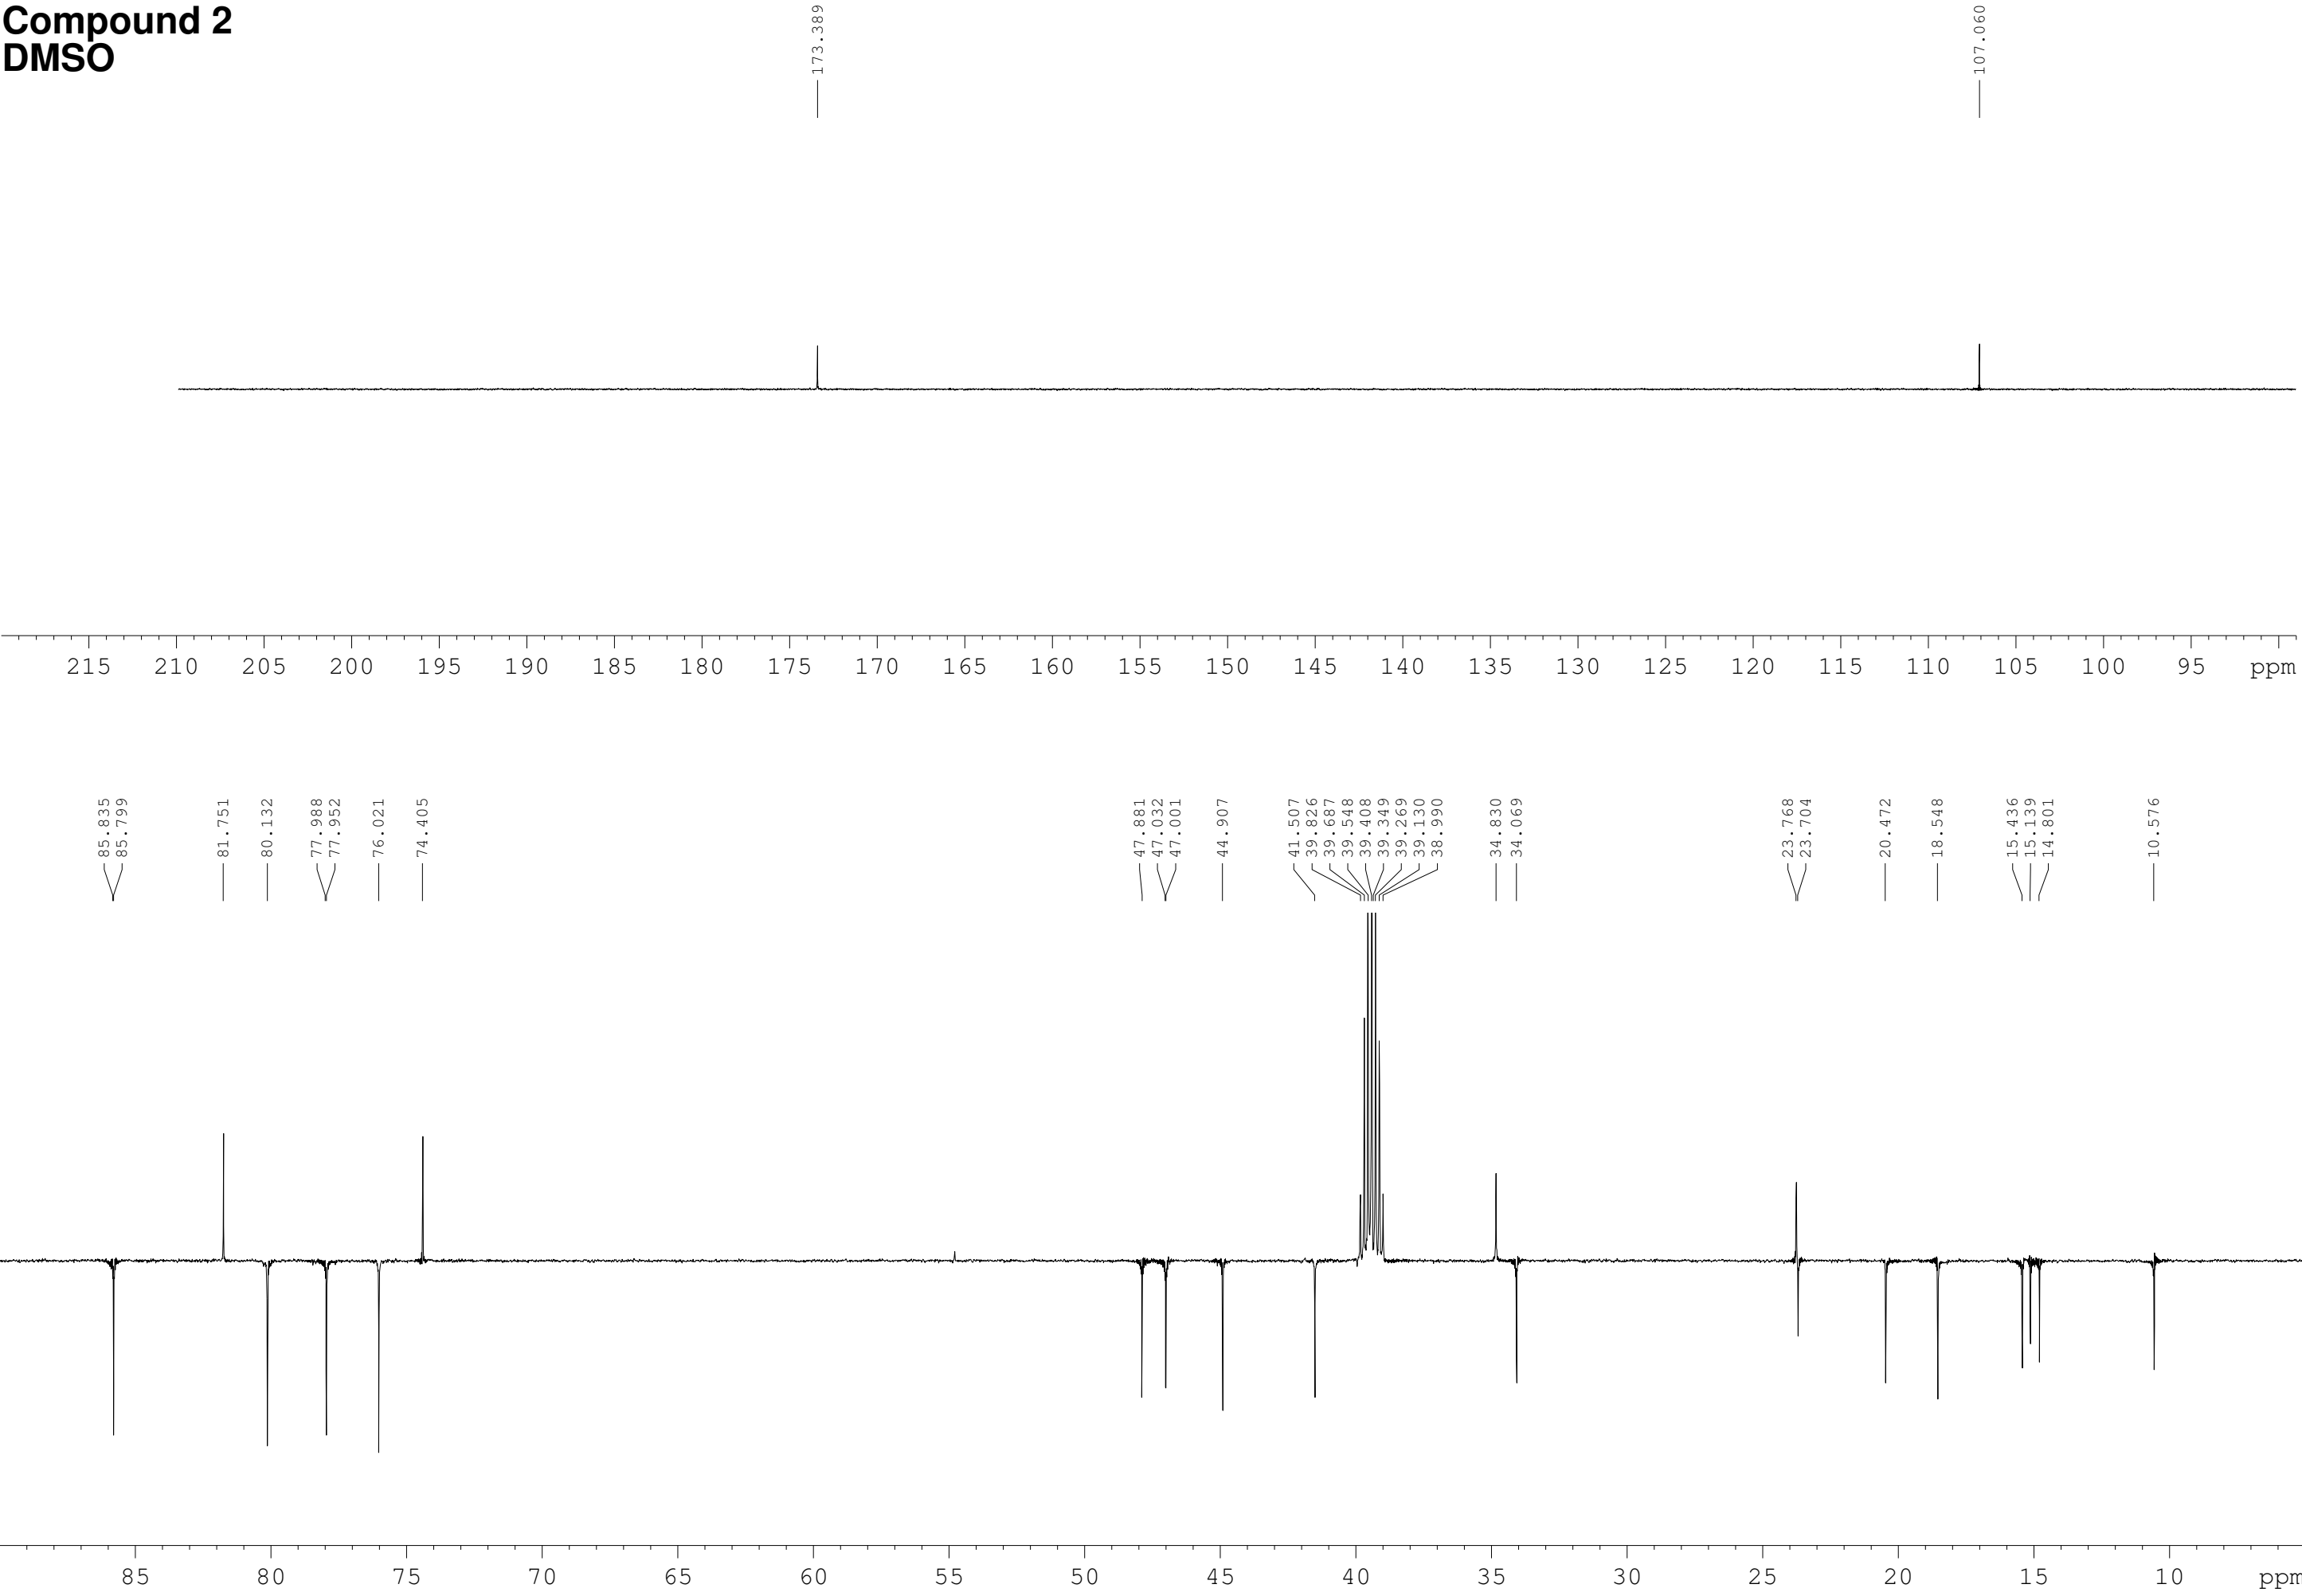

Supplement: Additional file 3 [file 1860-5397-11-157-S3.zip]

Compound 2  
CDCl3

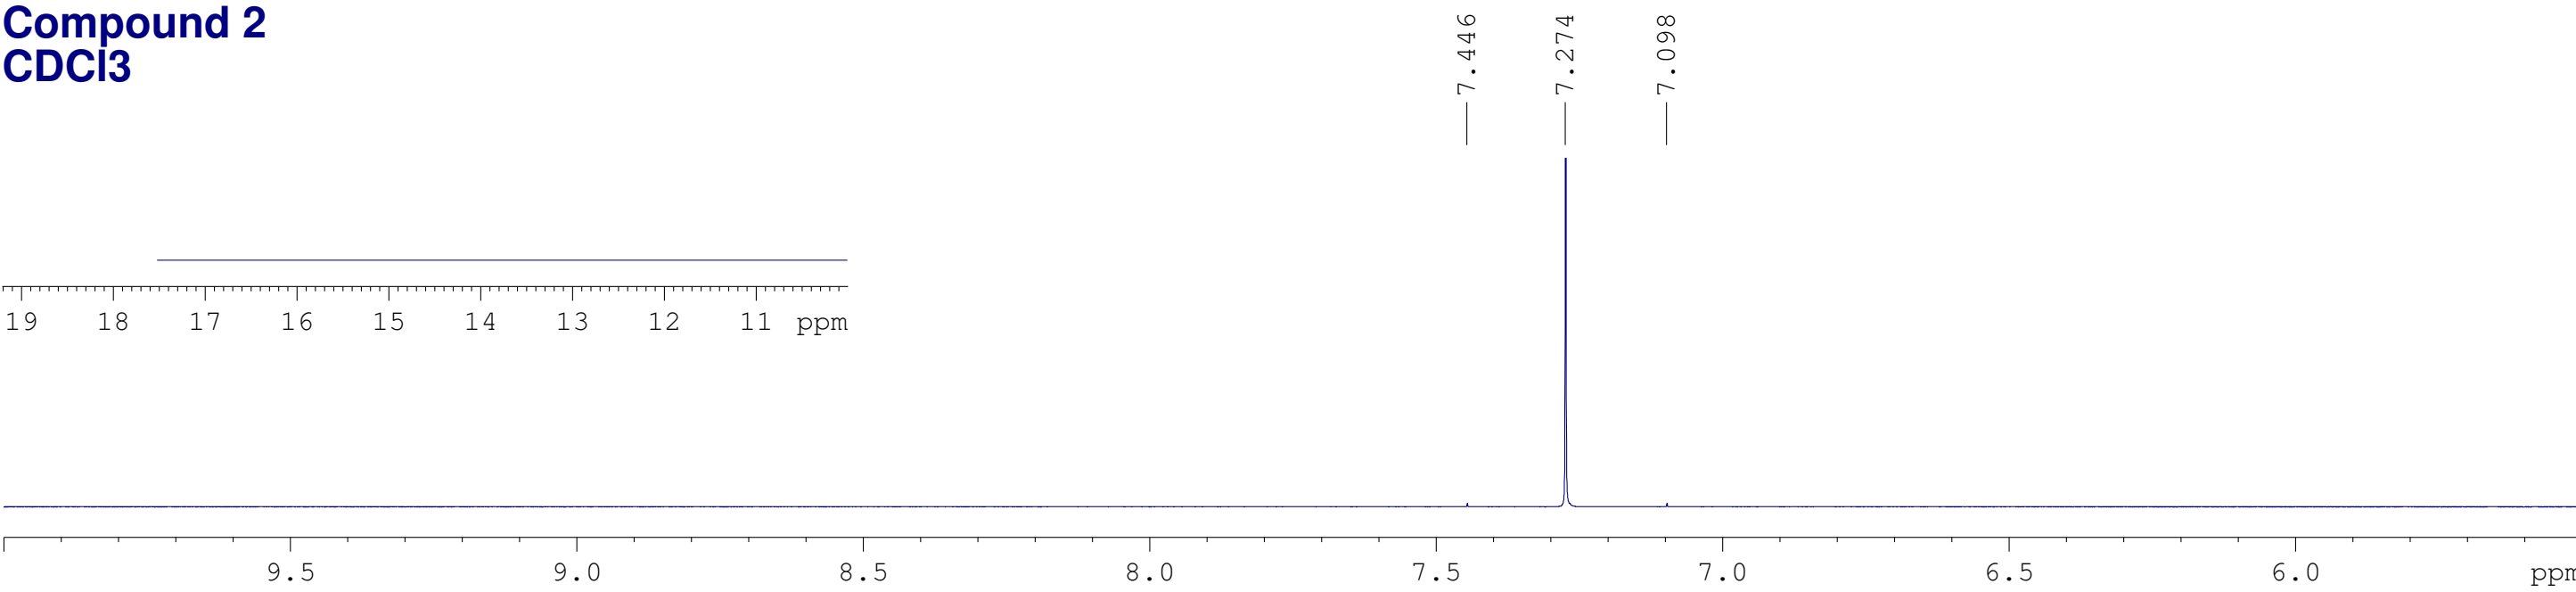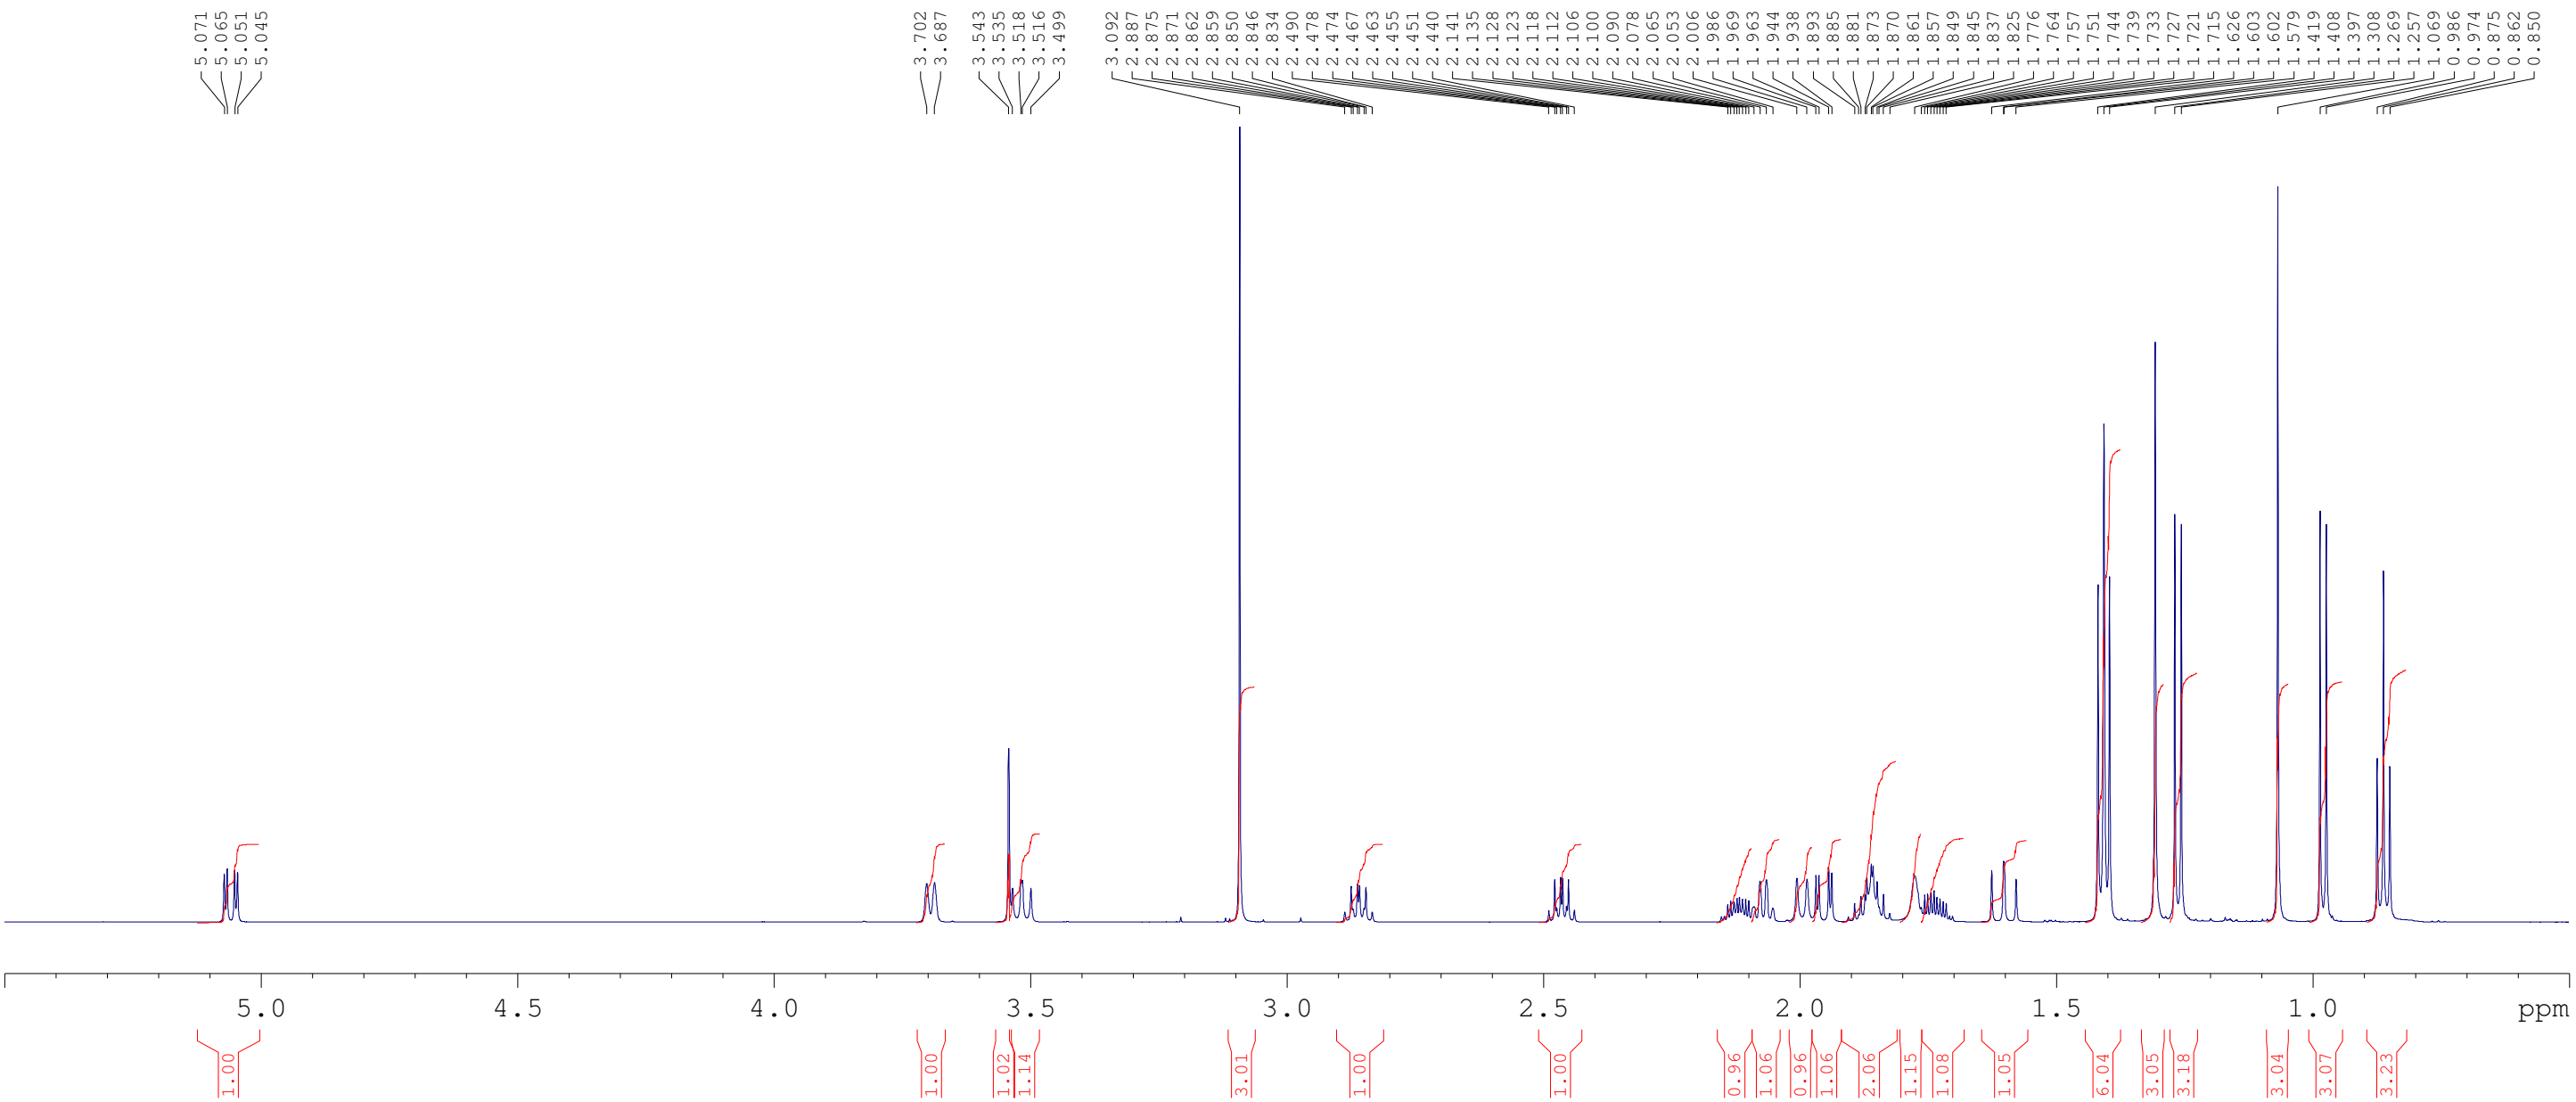

Supplement: Additional file 3 [file 1860-5397-11-157-S3.zip]

Compound 4  
DMSO

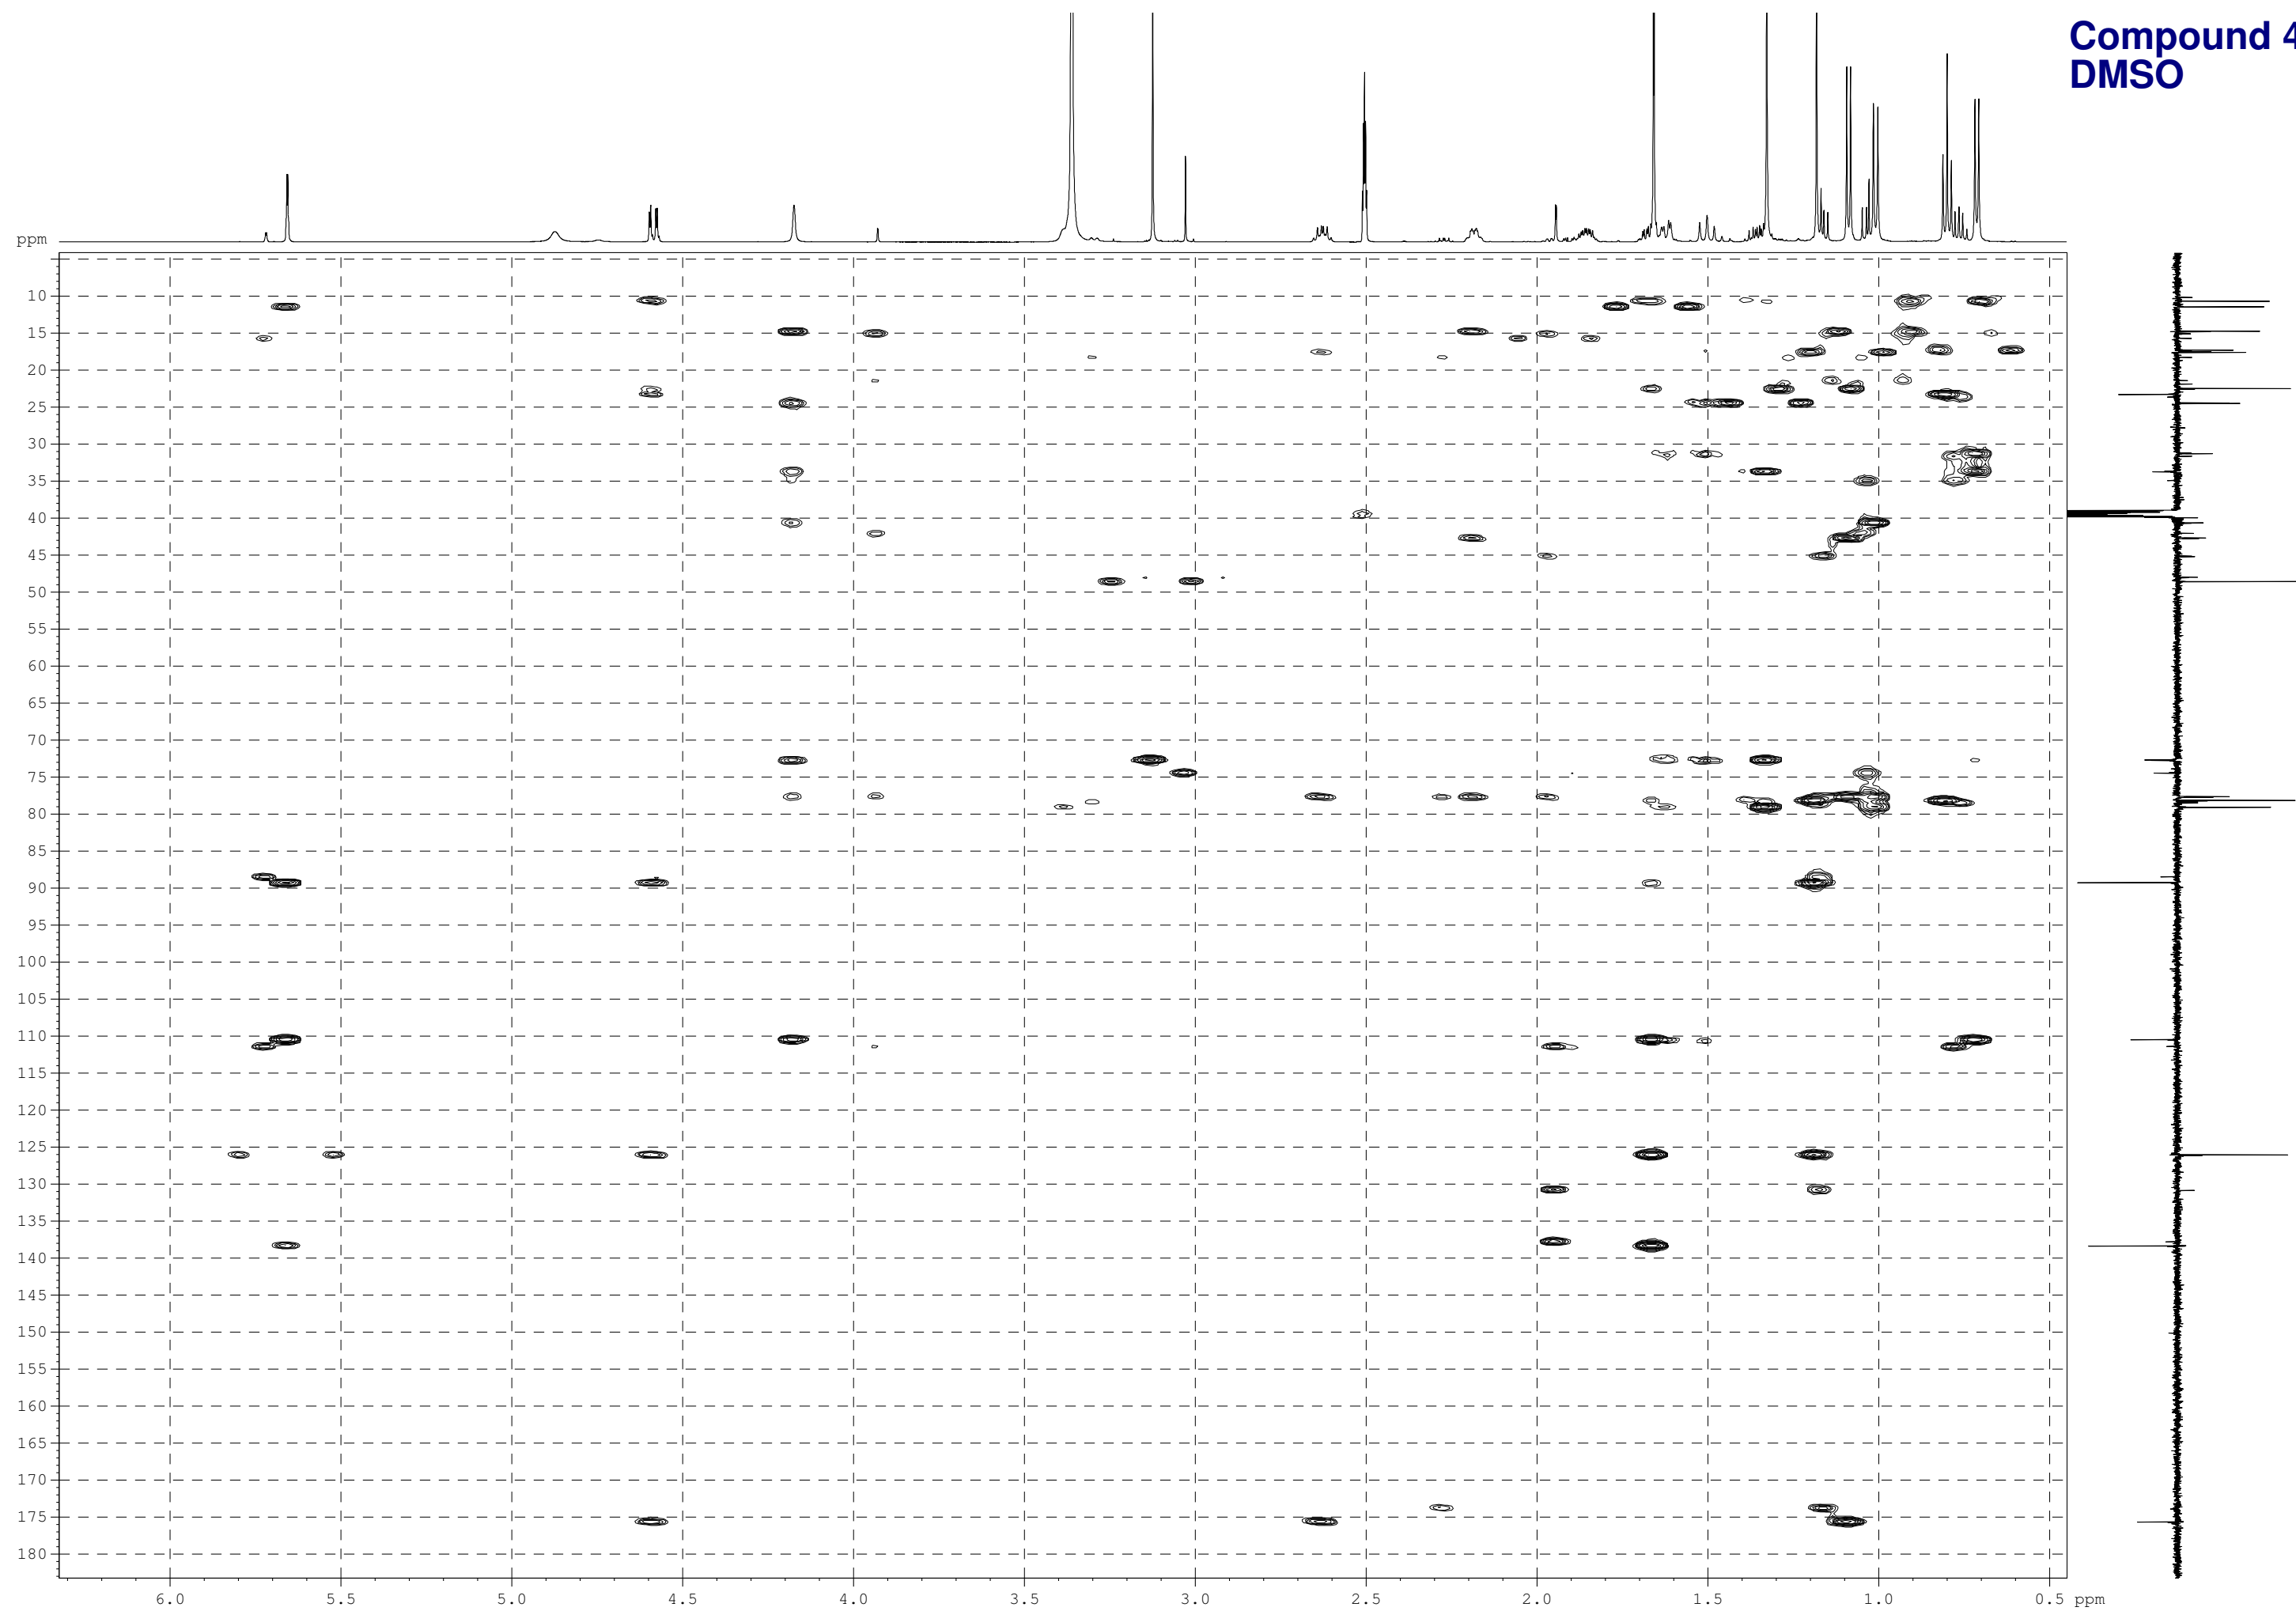

Supplement: Additional file 3 [file 1860-5397-11-157-S3.zip]

Compound 4  
CDCl3

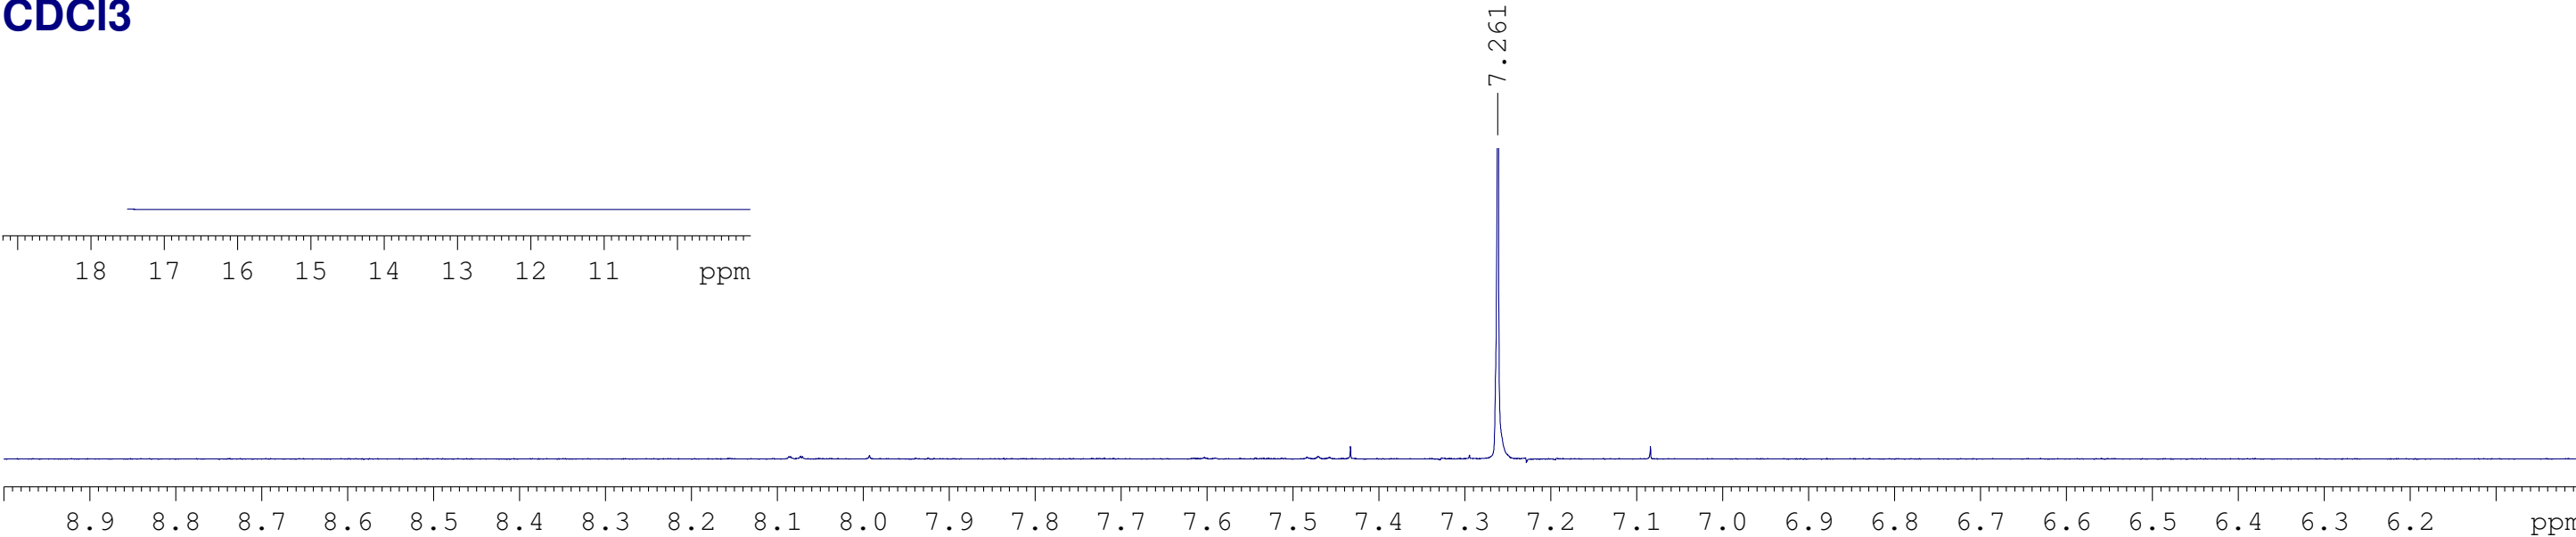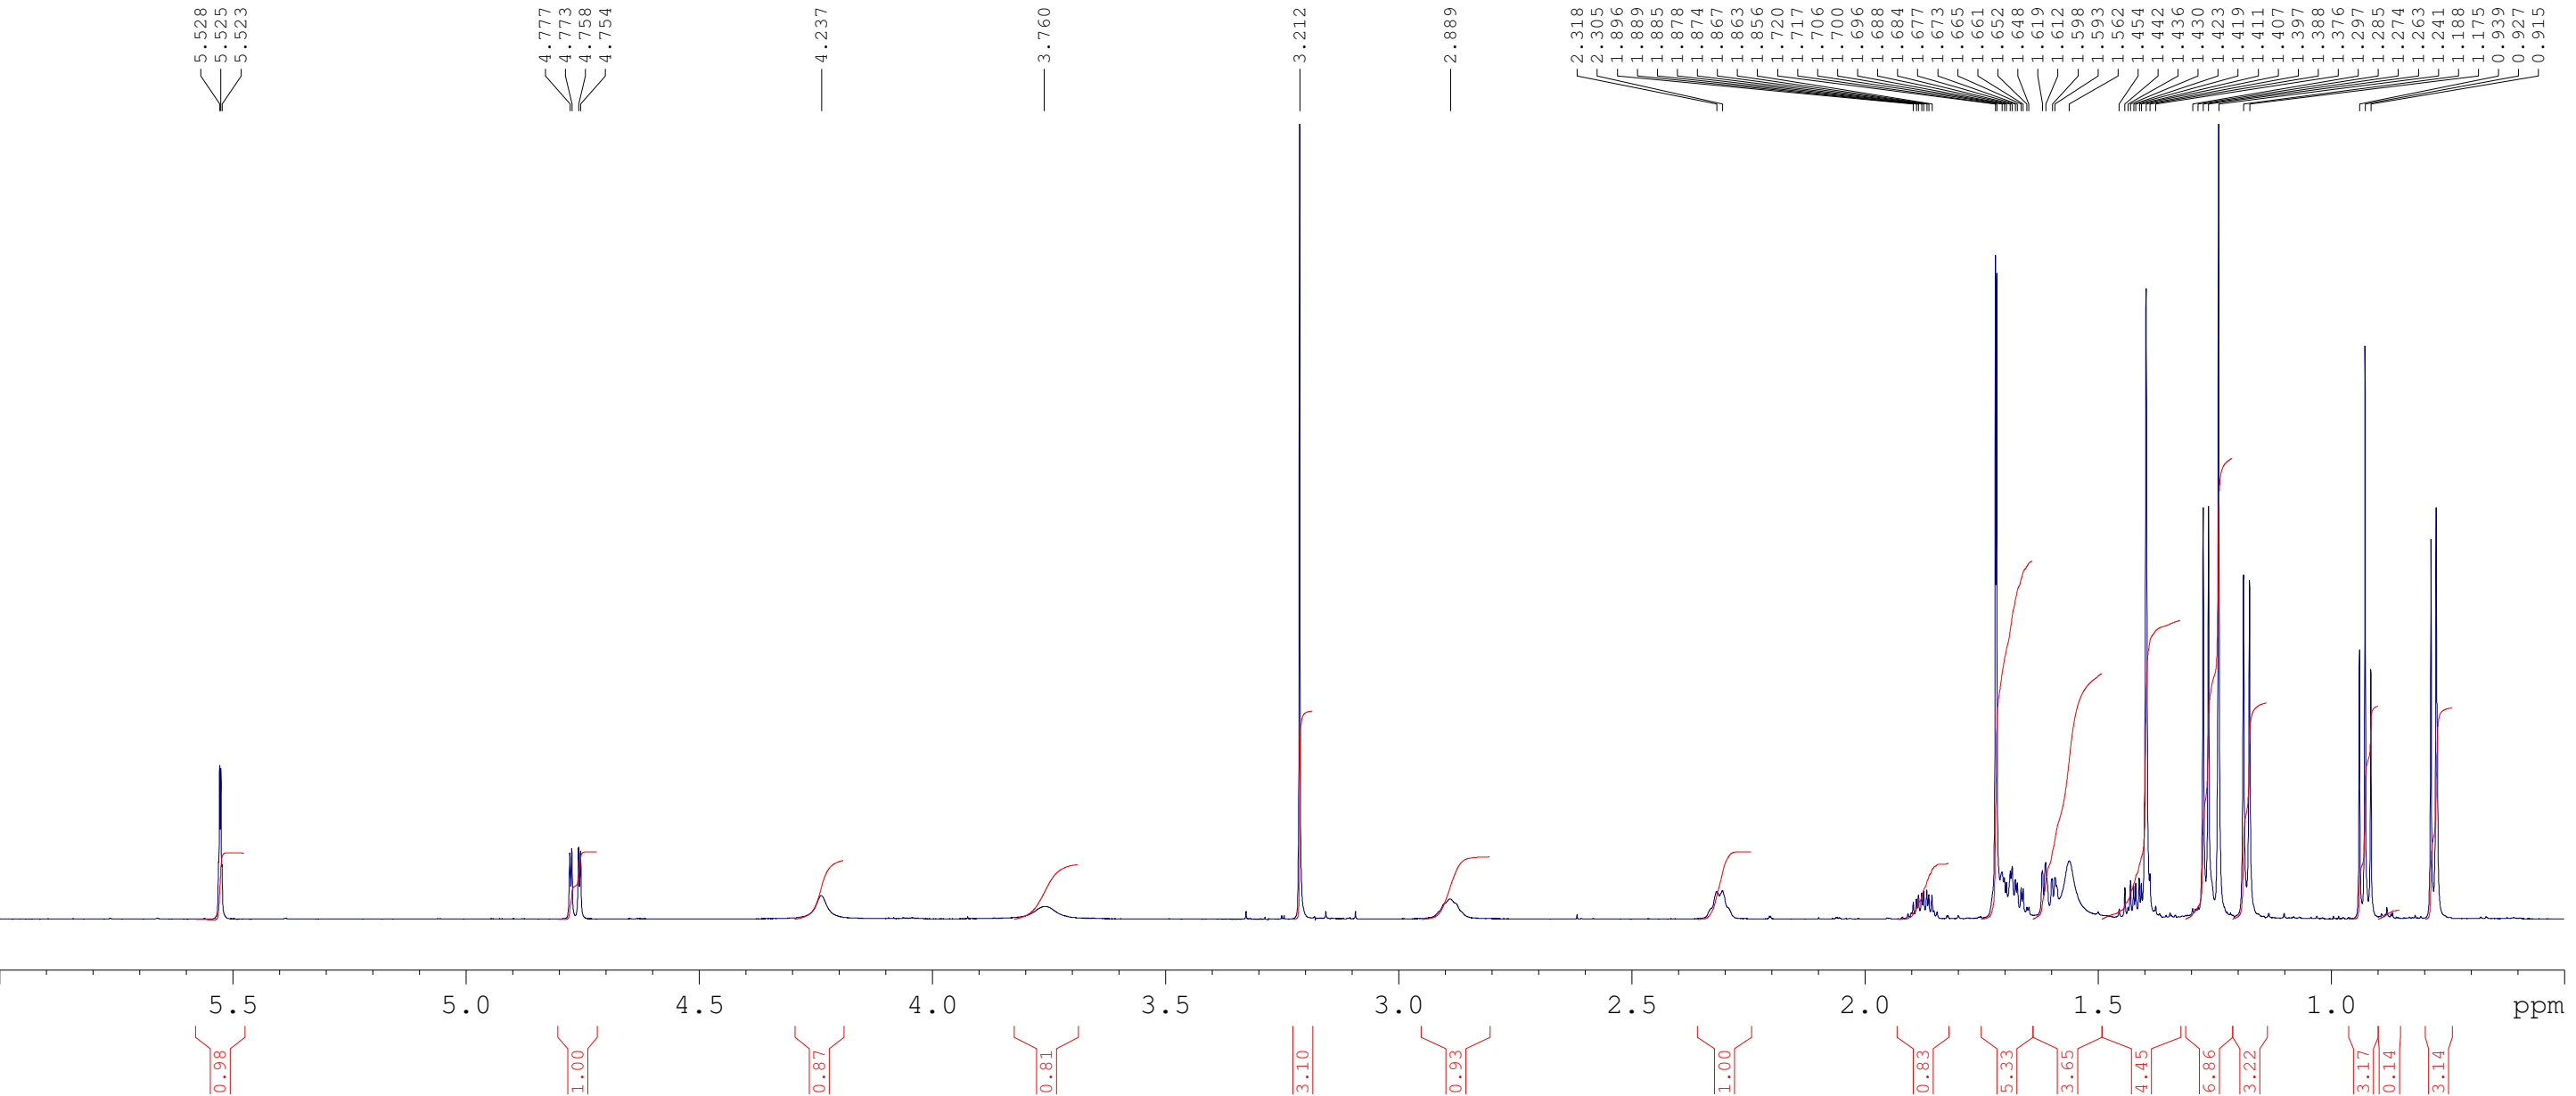

Supplement: Additional file 3 [file 1860-5397-11-157-S3.zip]

Compound 3  
CDCl<sub>3</sub>

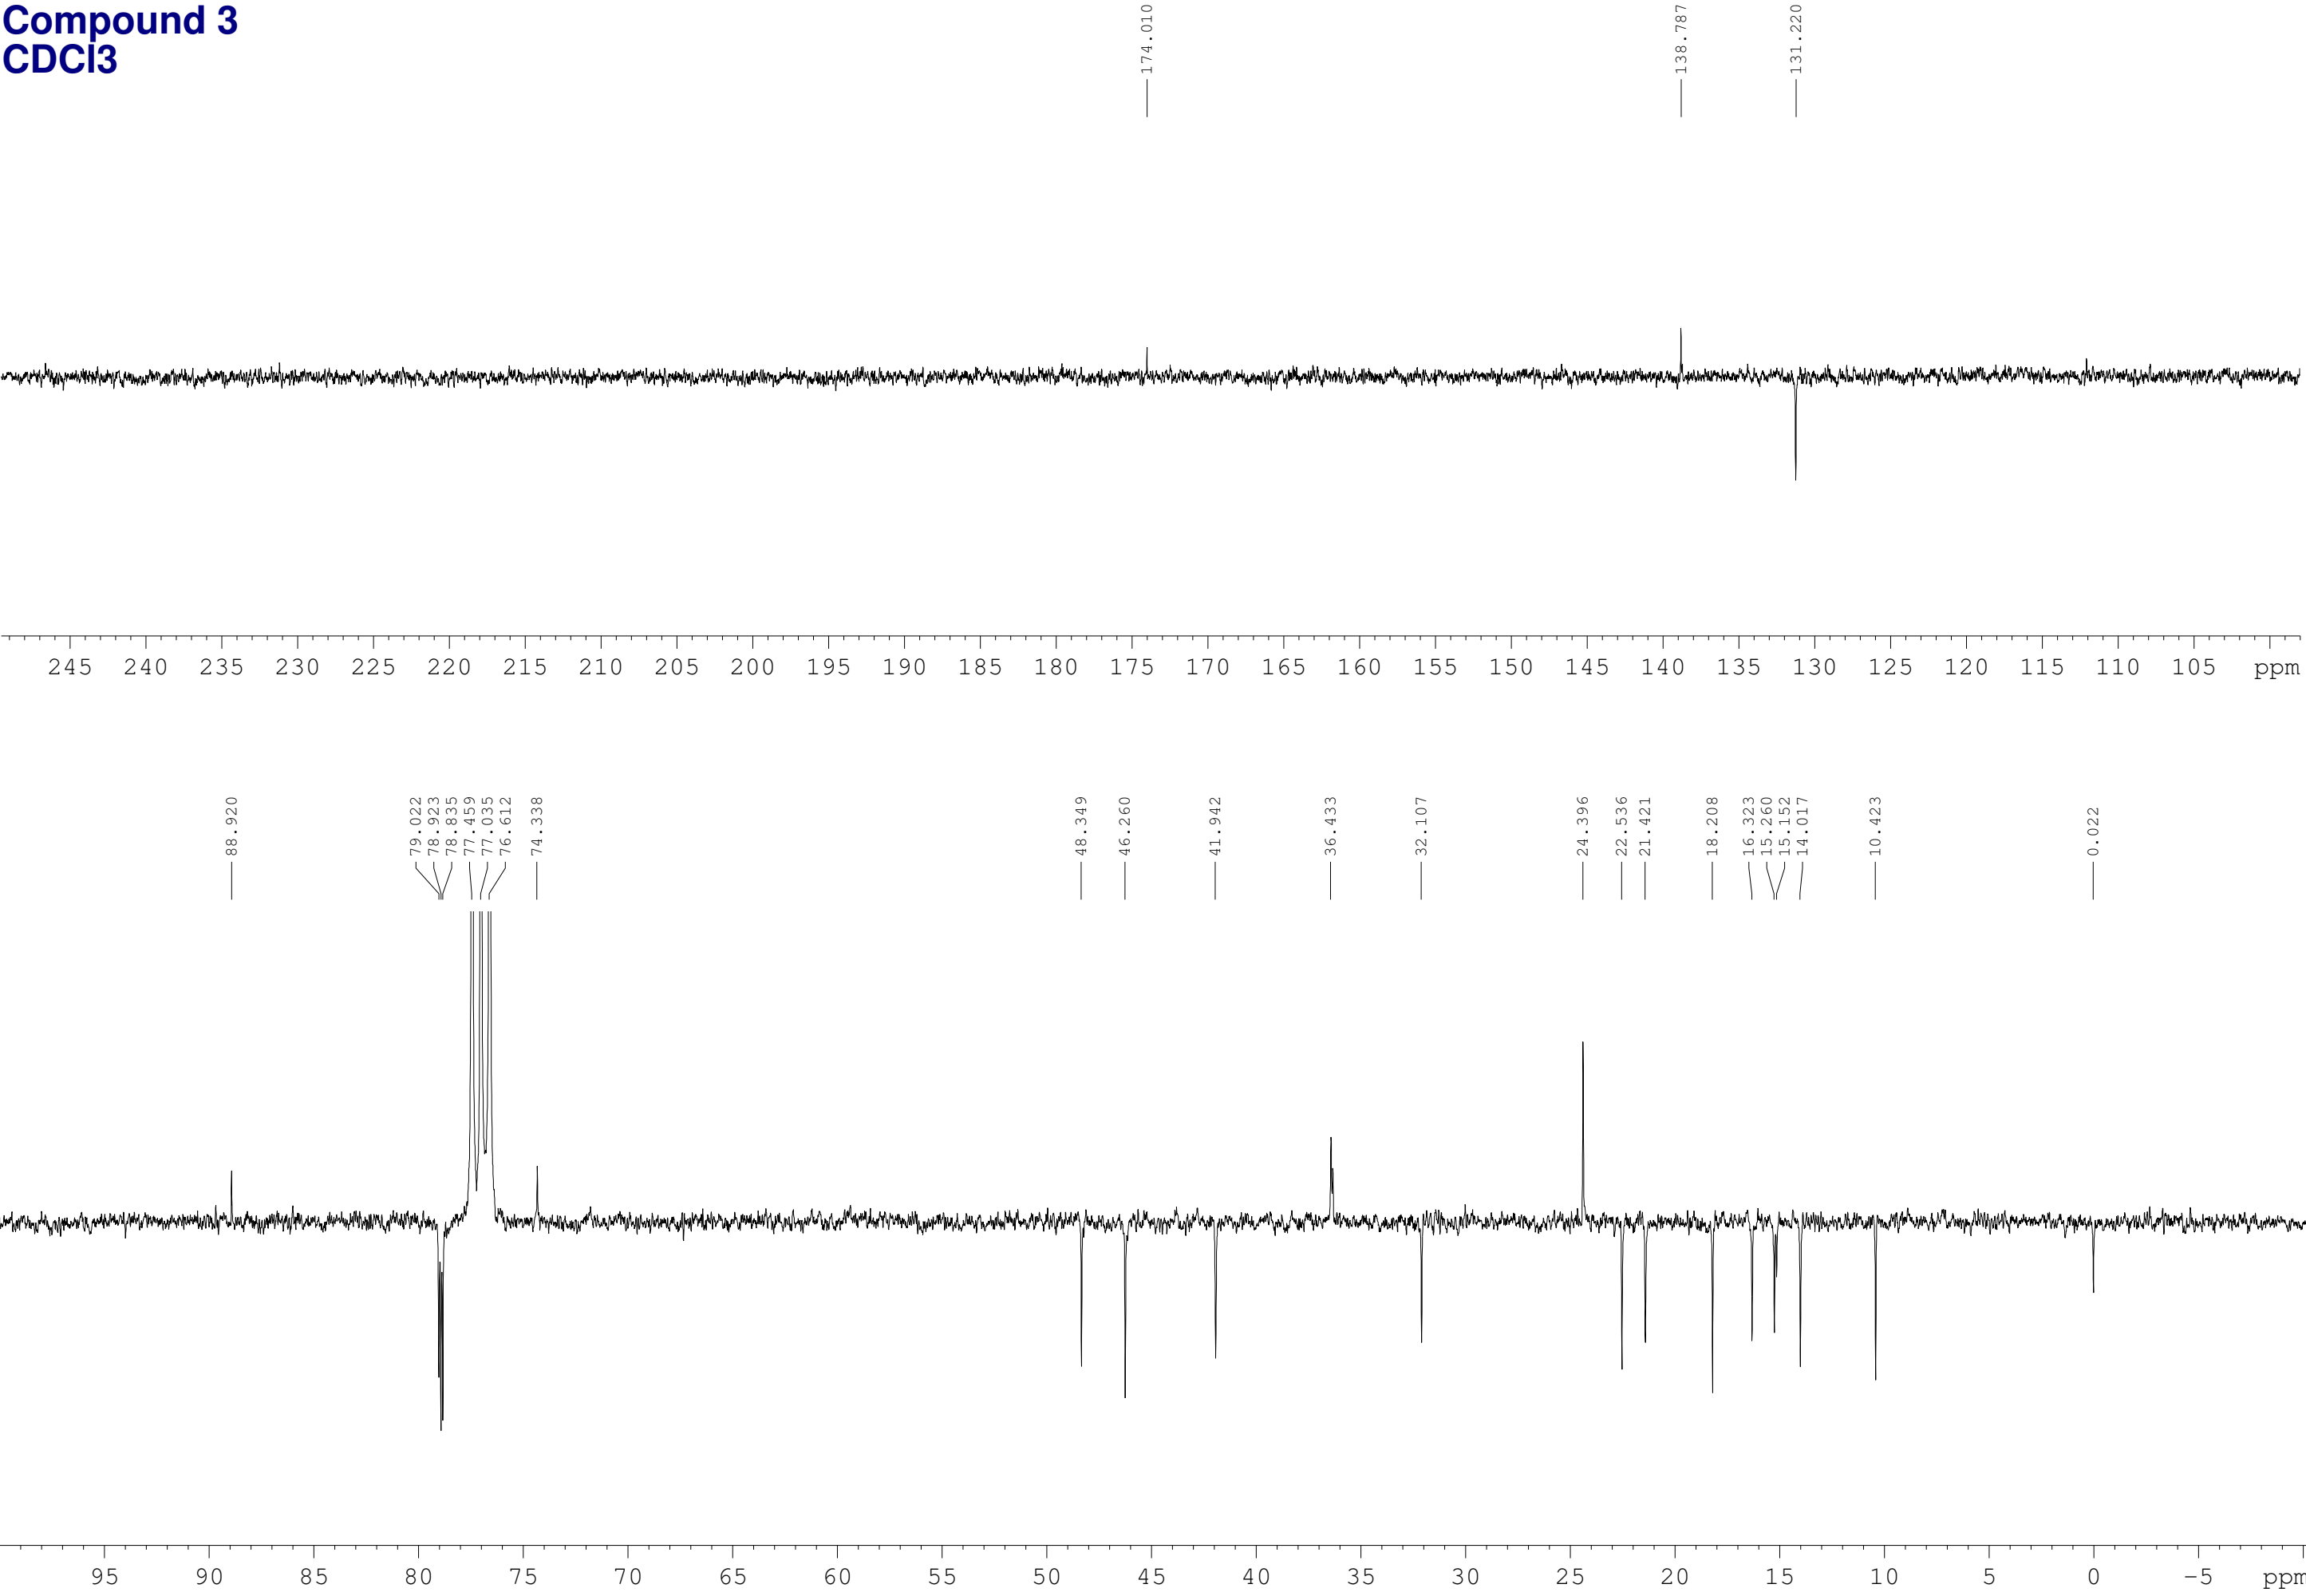

Supplement: Additional file 3 [file 1860-5397-11-157-S3.zip]

**Compounds  
2, 3 and 4  
in the mixture  
CDCl<sub>3</sub>**

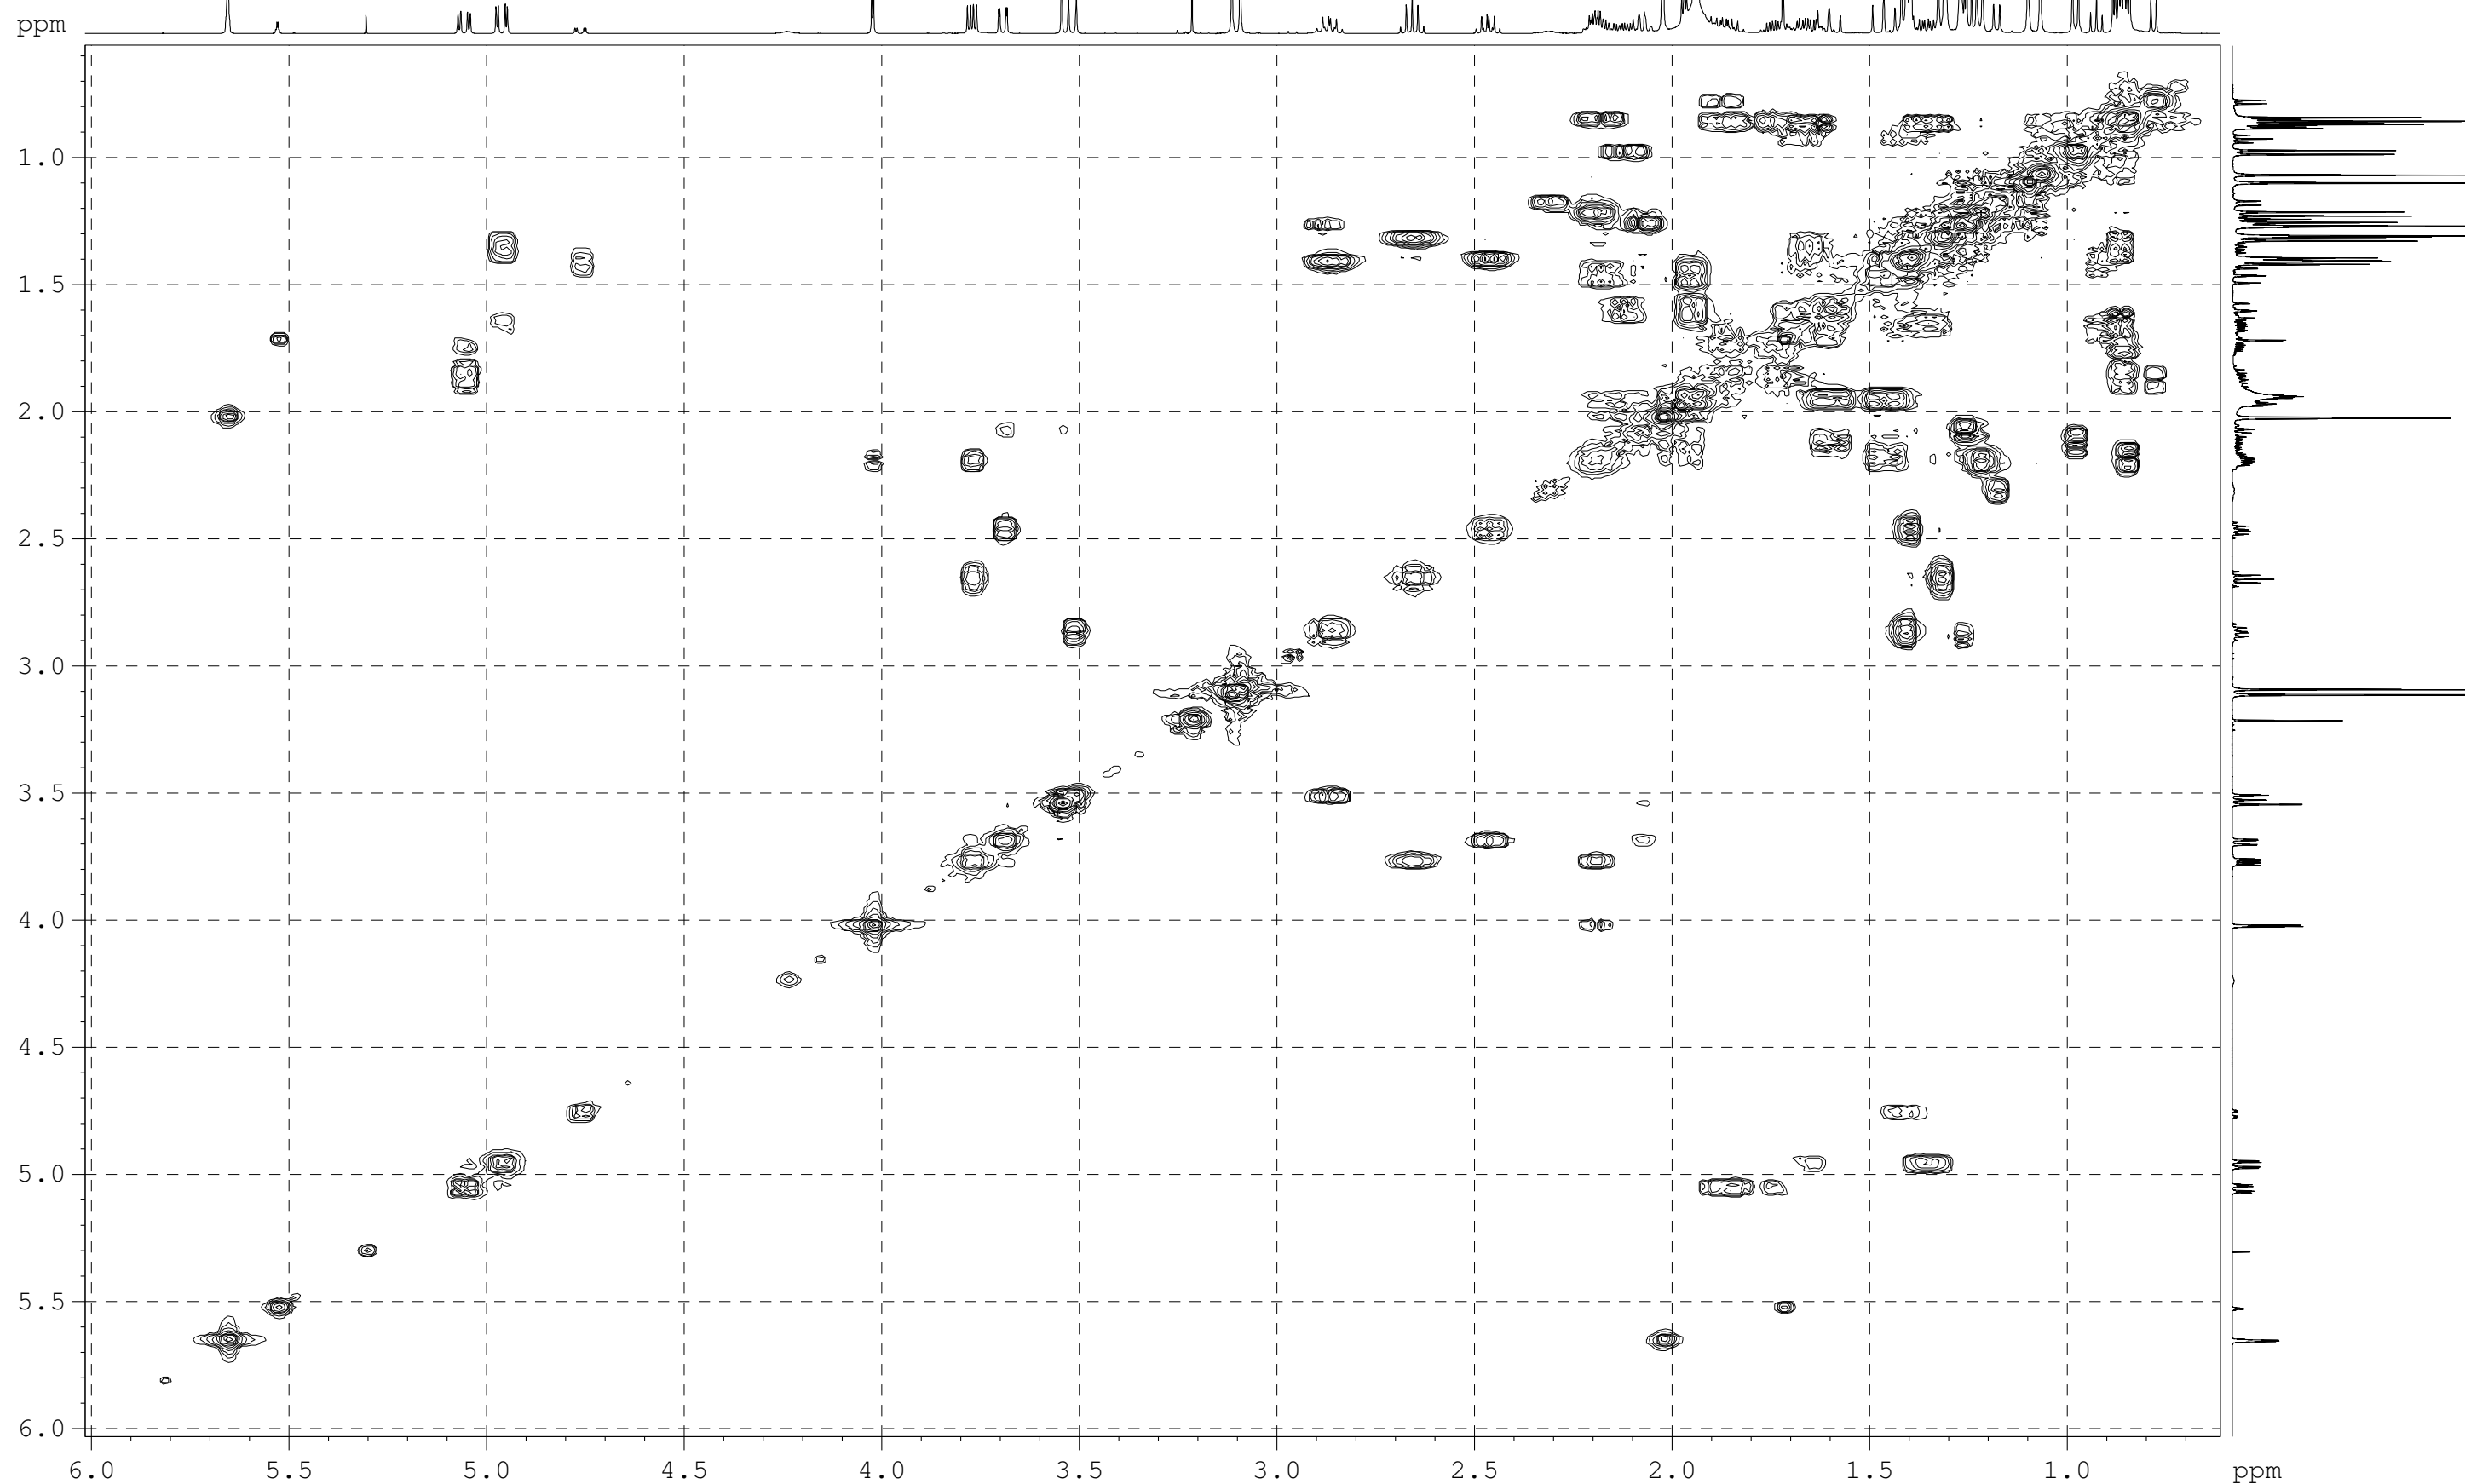

Supplement: Additional file 3 [file 1860-5397-11-157-S3.zip]

Compound 2  
DMSO

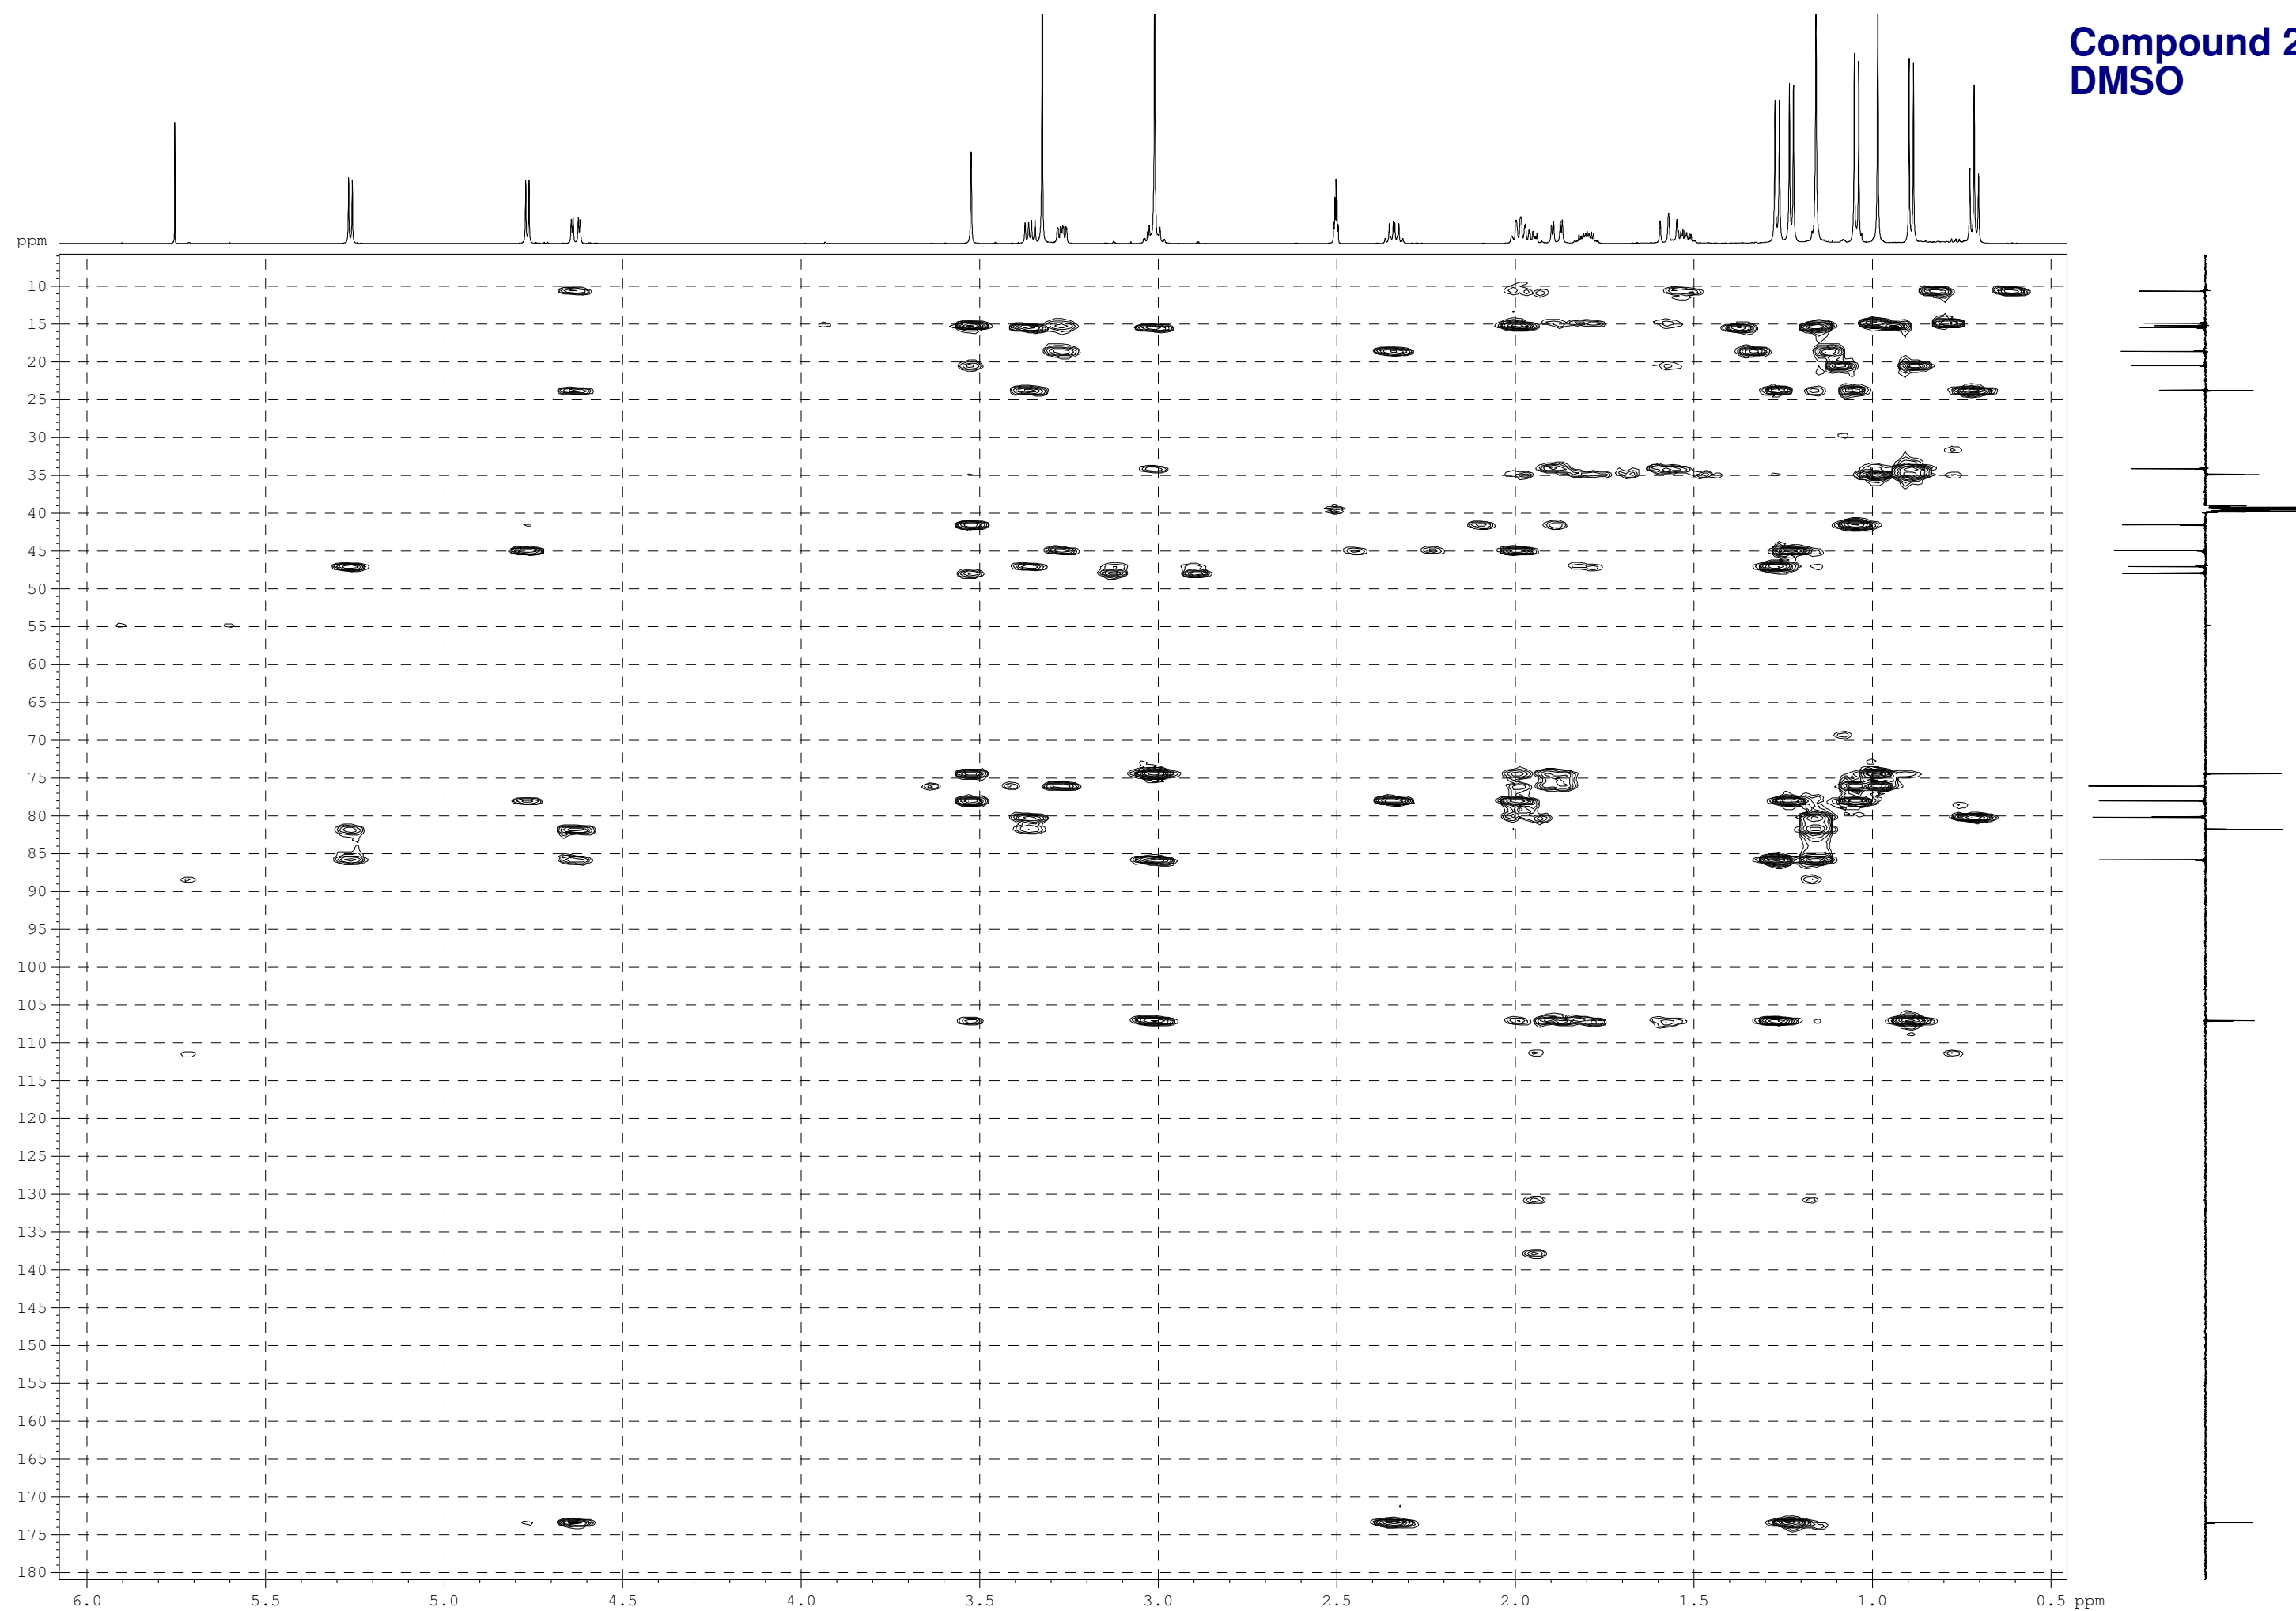

Supplement: Additional file 3 [file 1860-5397-11-157-S3.zip]

Compounds 2, 3 and 4 in the mixture  
CDCl<sub>3</sub>

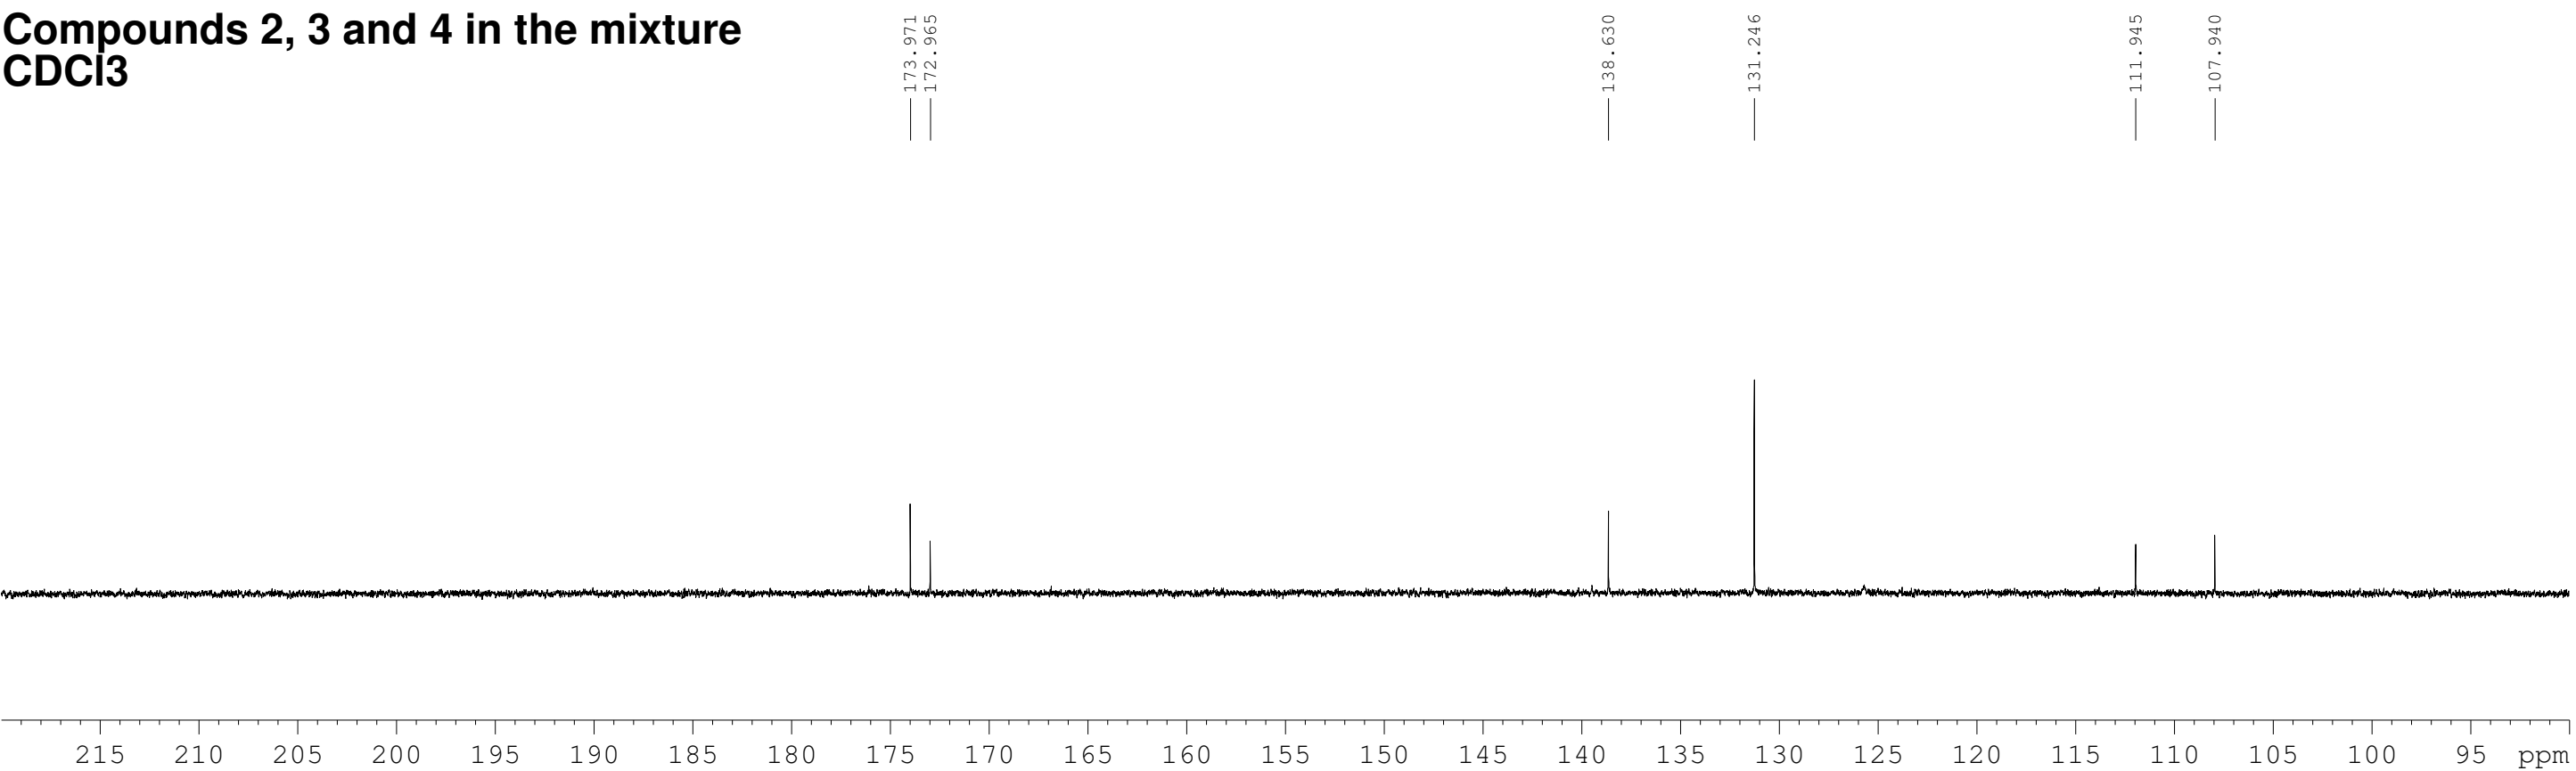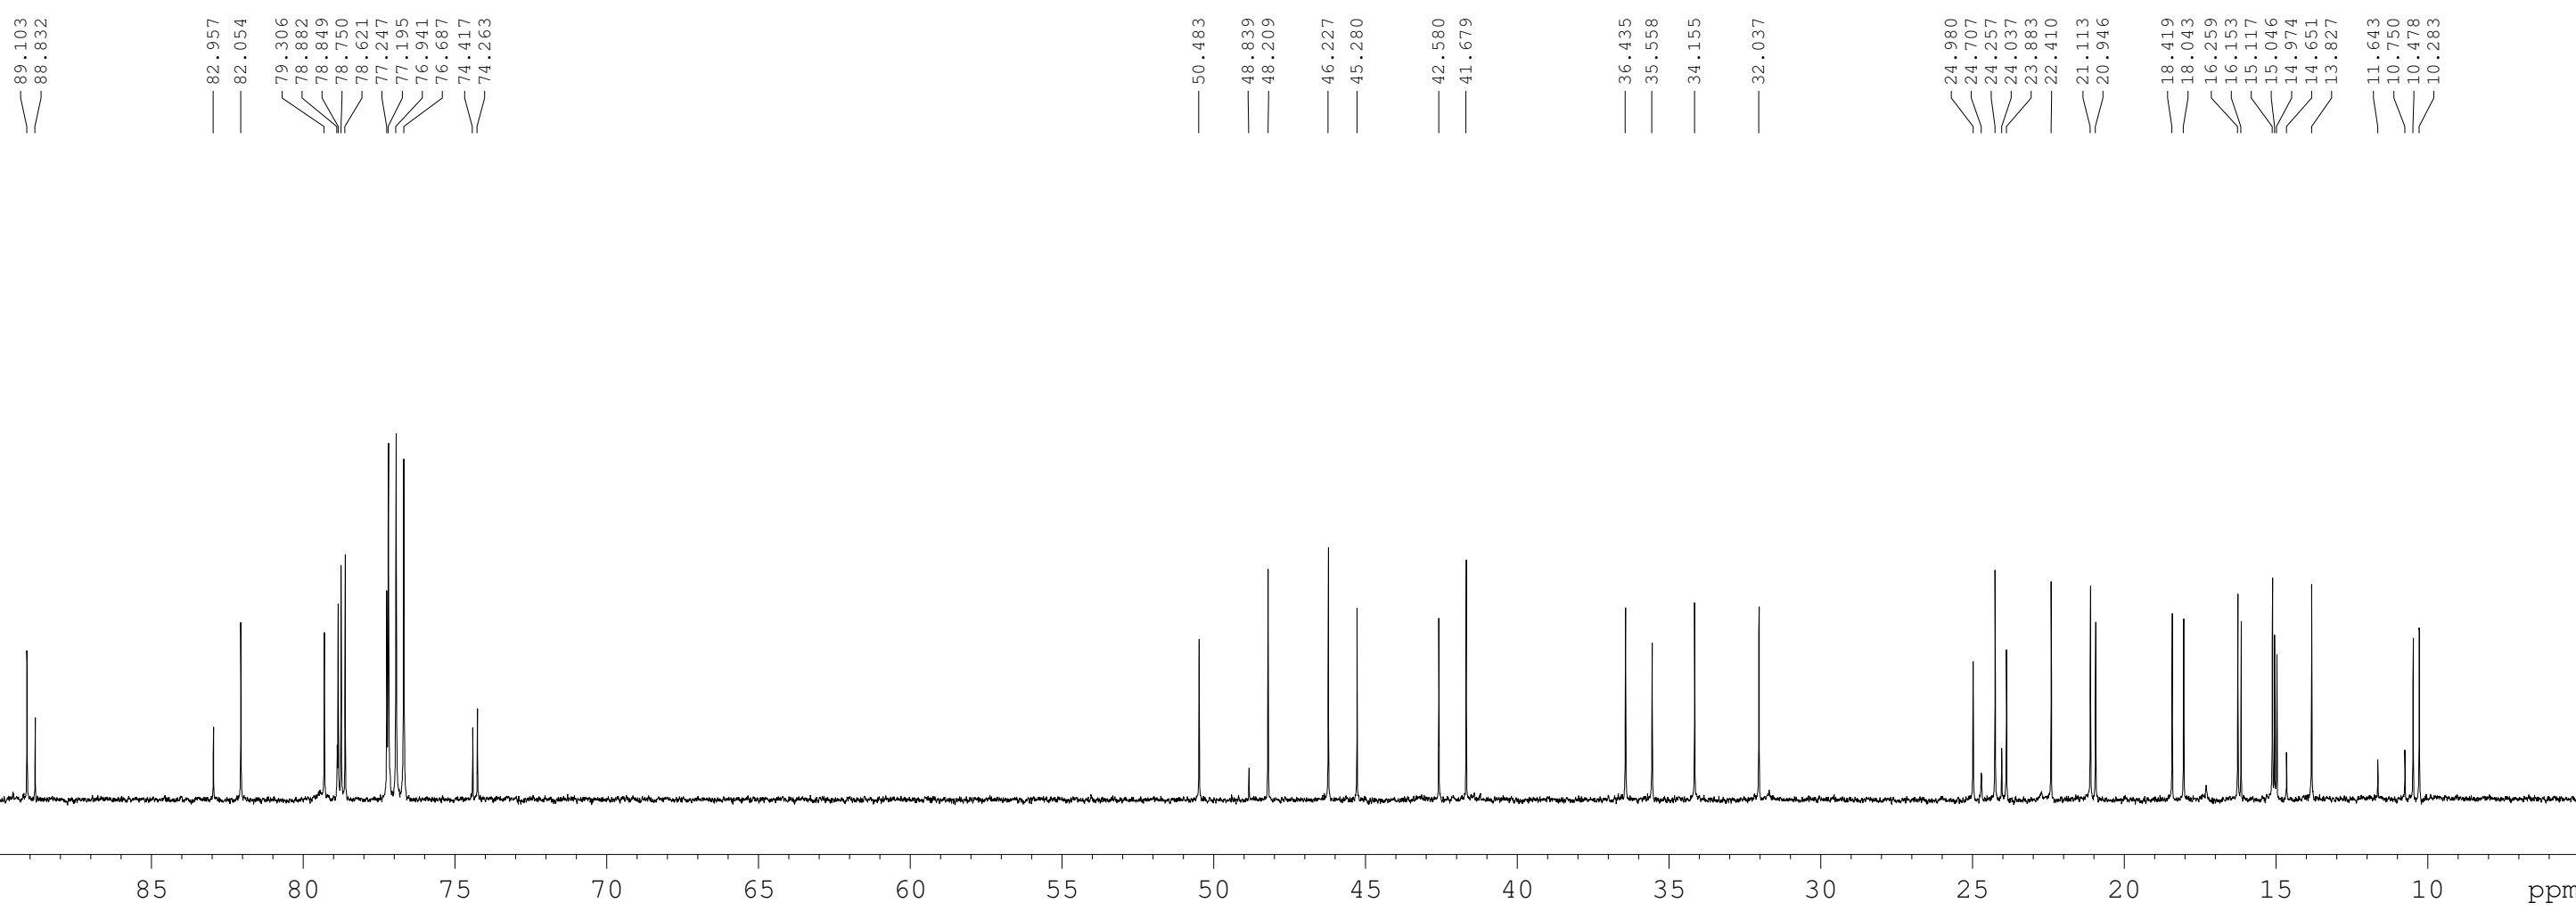

Supplement: Additional file 3 [file 1860-5397-11-157-S3.zip]

Compound 3  
CDCl<sub>3</sub>

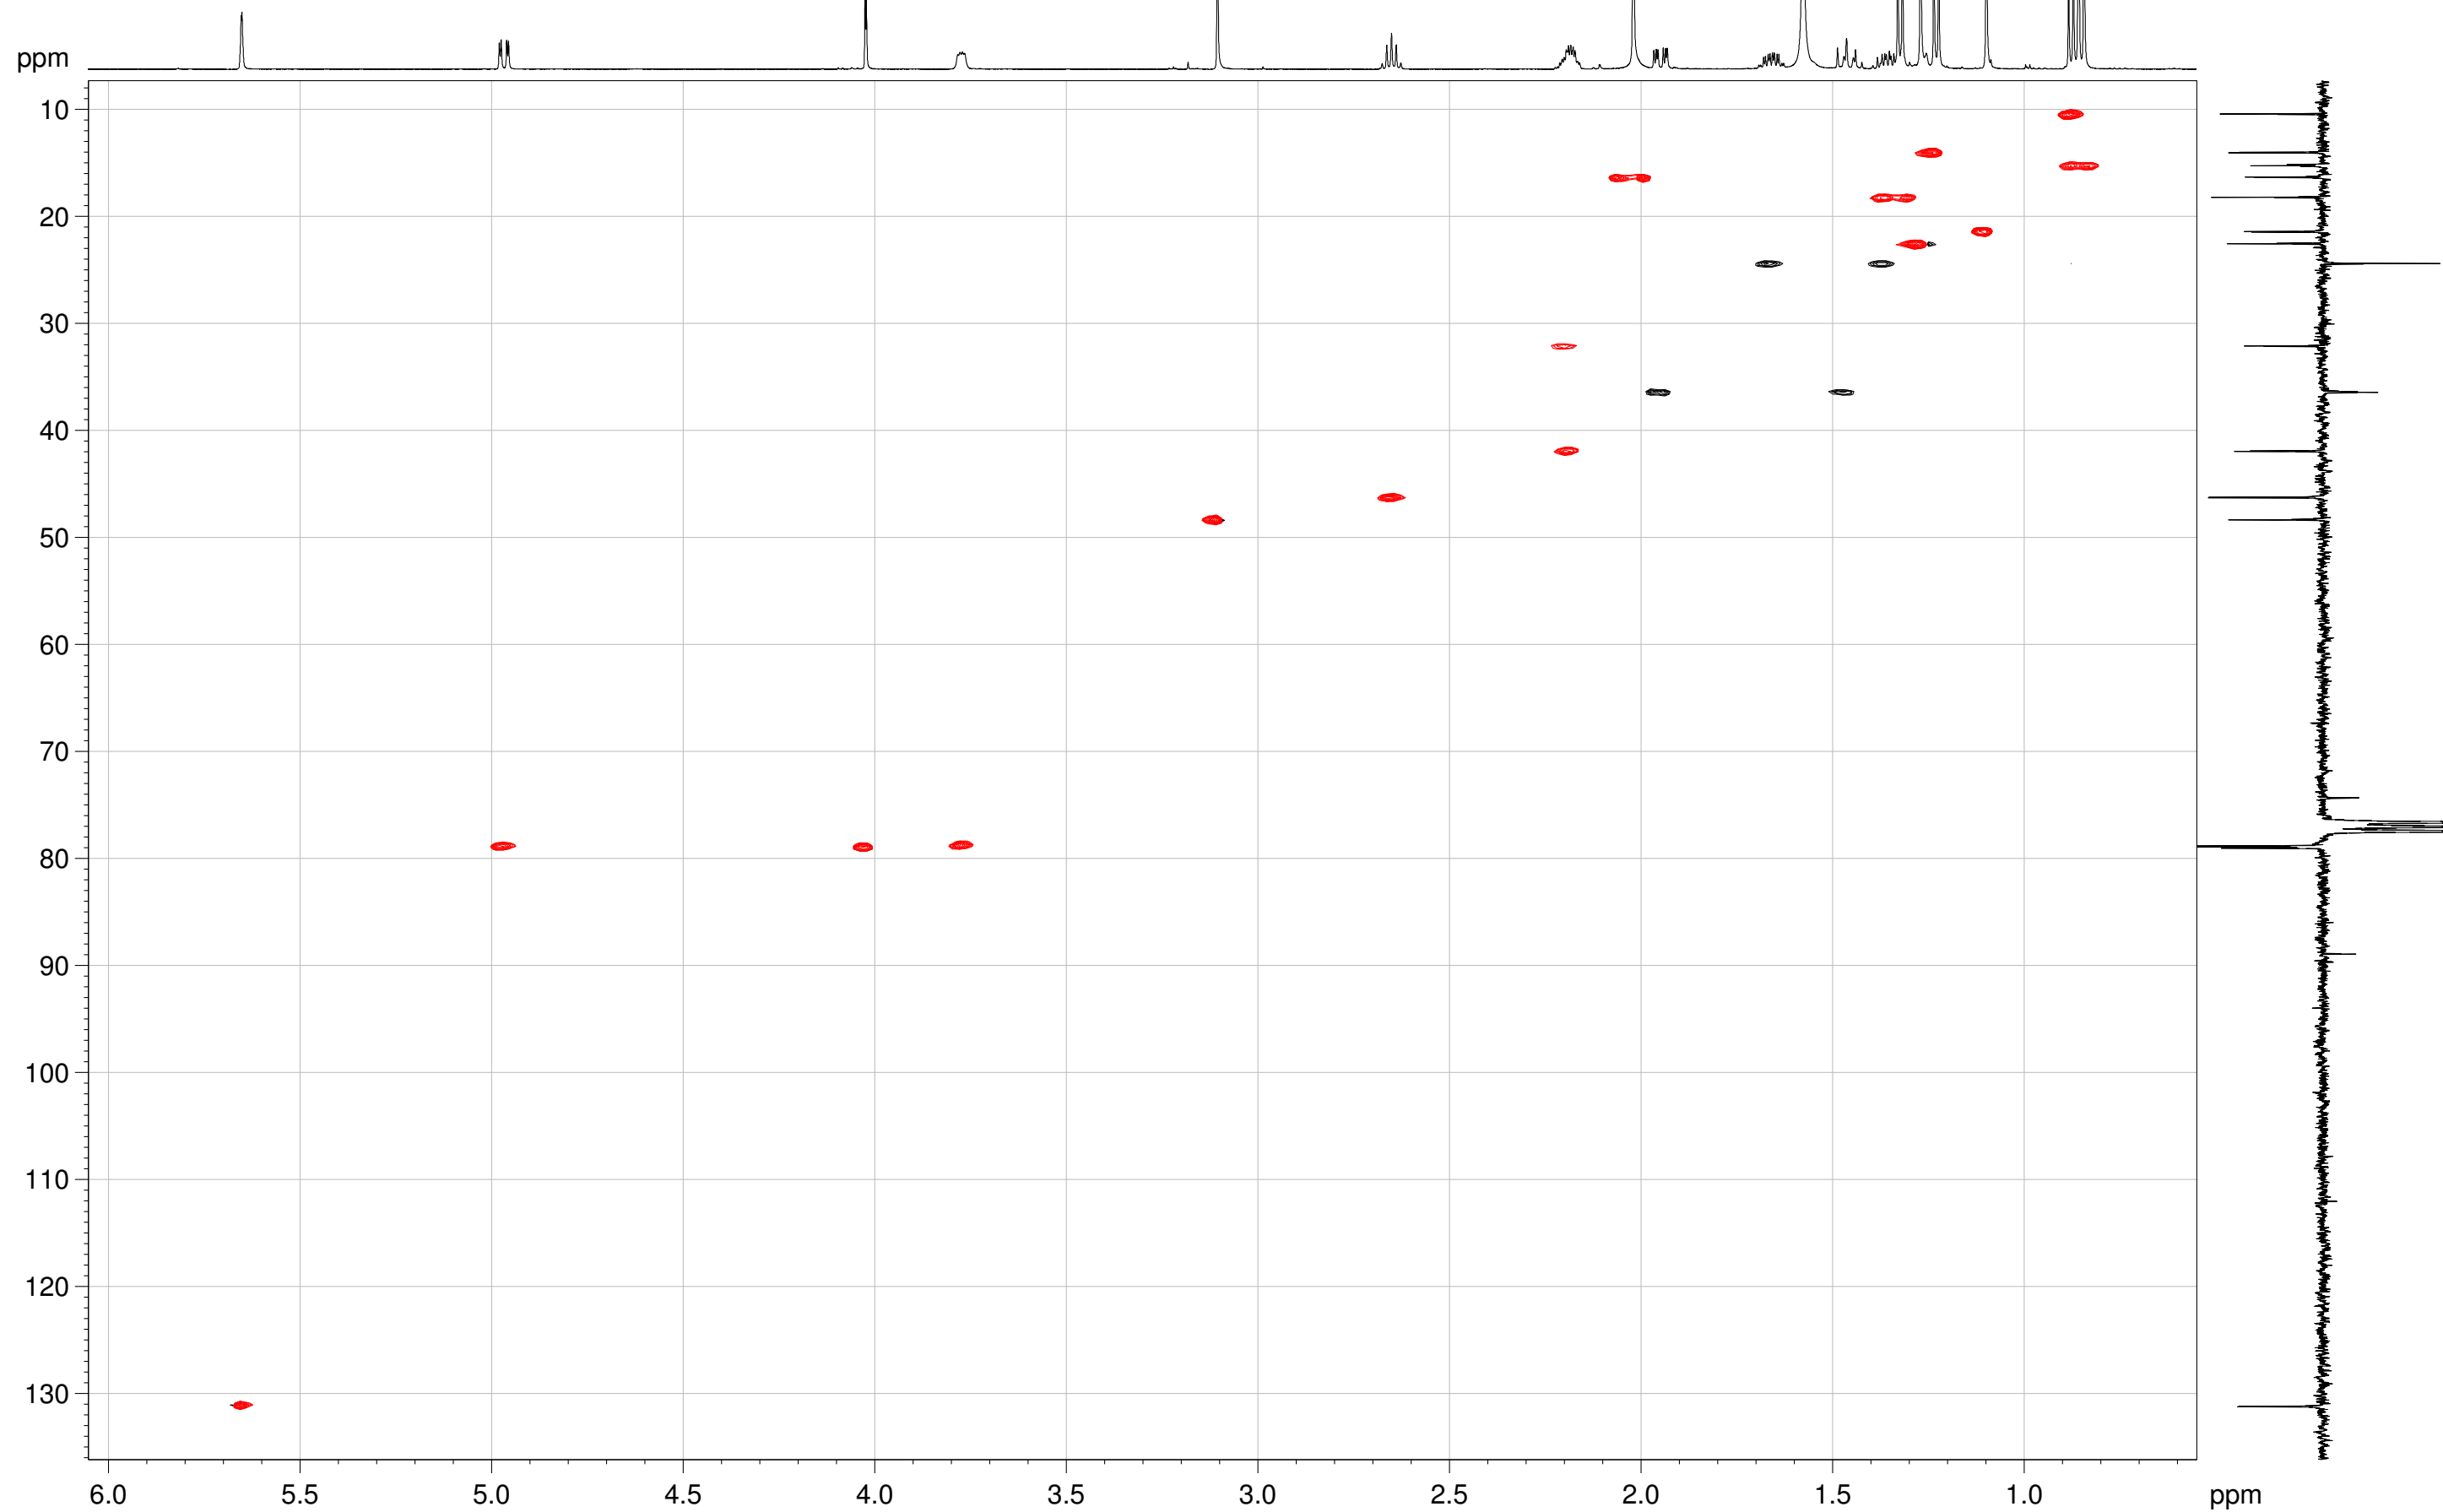

Supplement: Additional file 3 [file 1860-5397-11-157-S3.zip]

Compounds 2, 3 and 4 in the mixture  
CDCl3

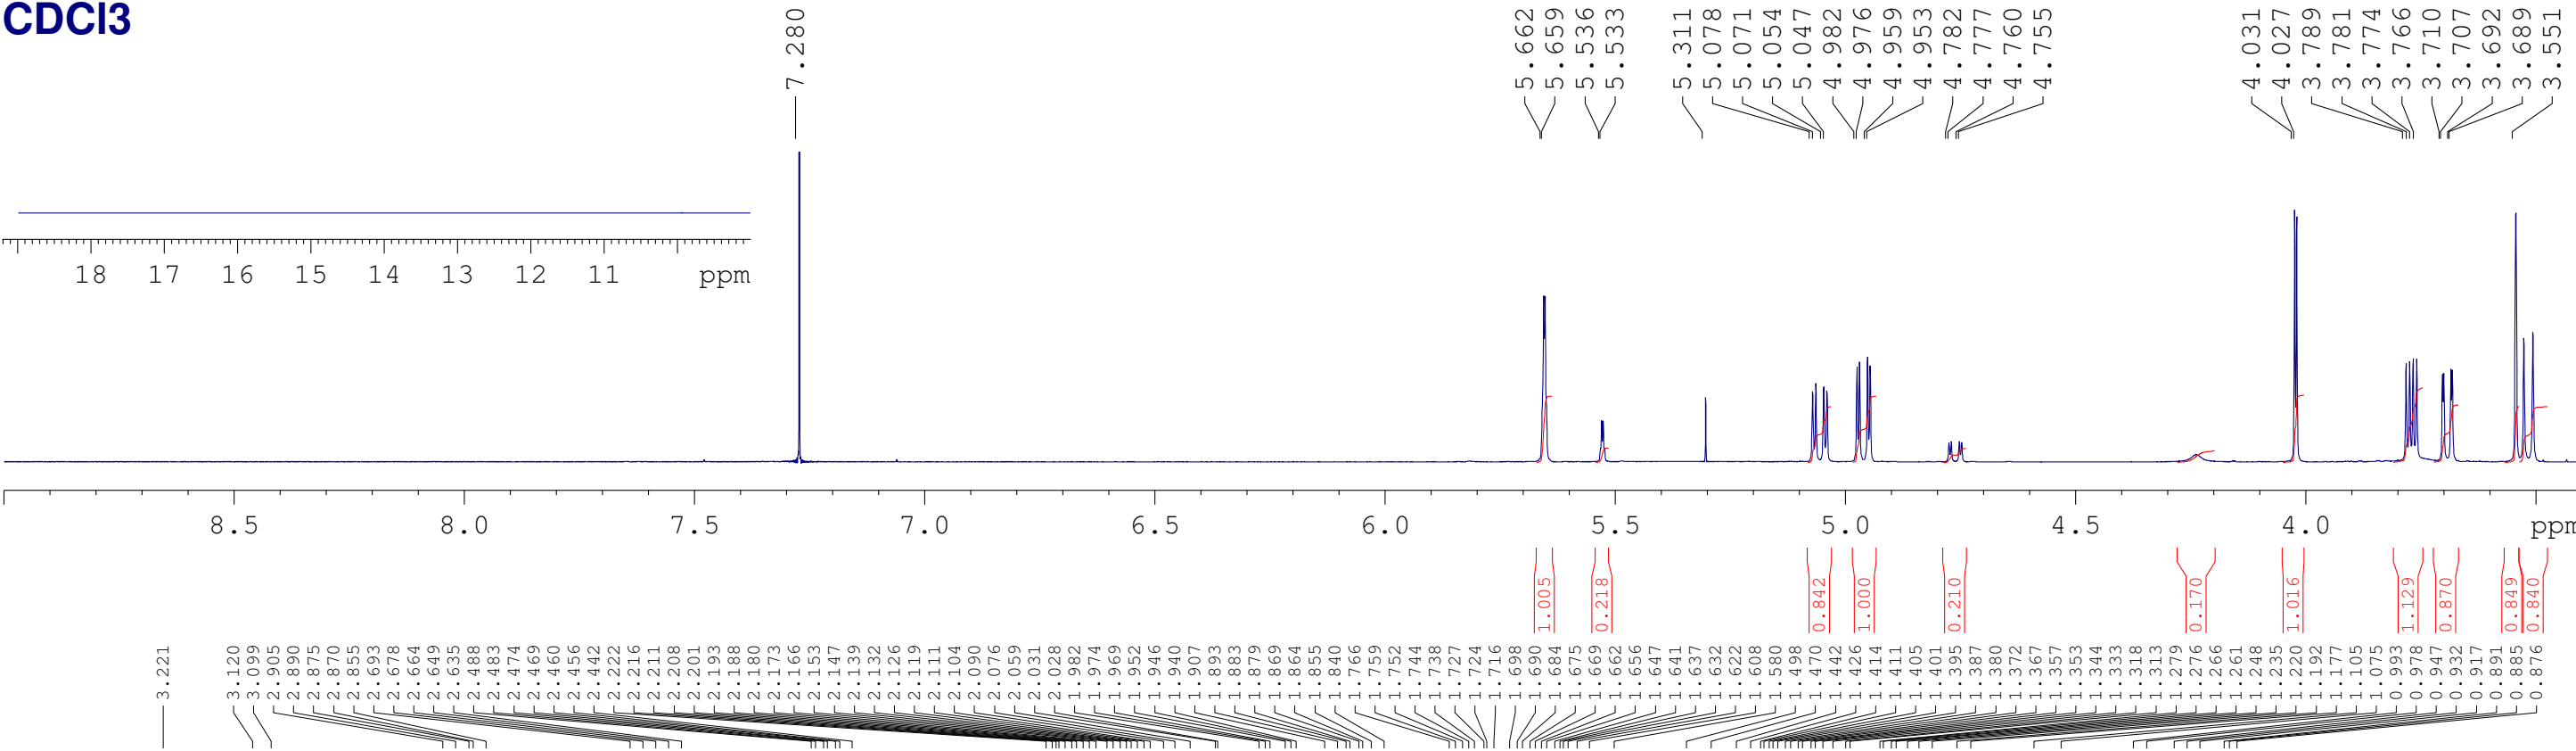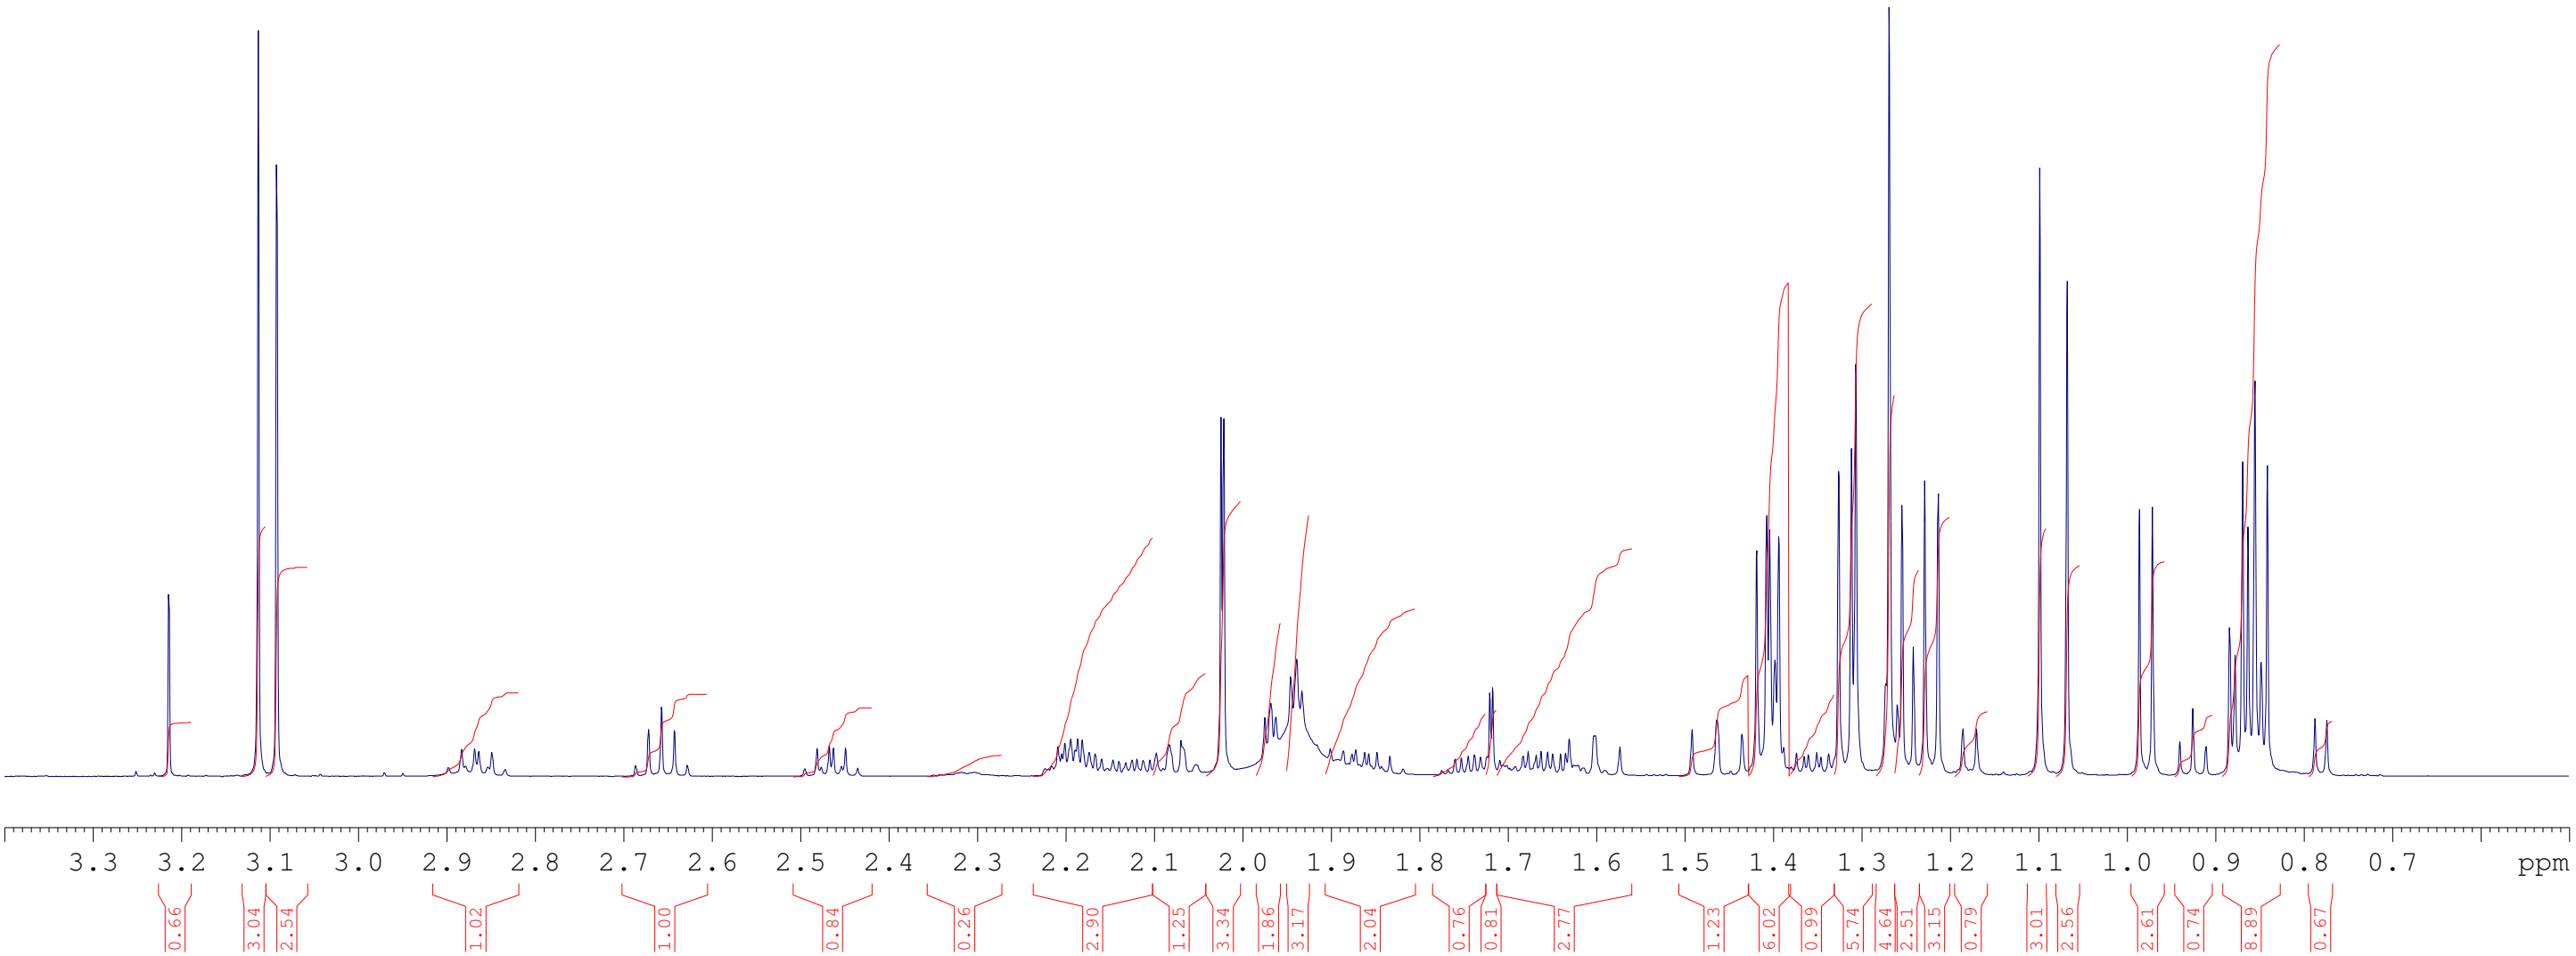

Supplement: Additional file 3 [file 1860-5397-11-157-S3.zip]

Compound 4  
CDCl<sub>3</sub>

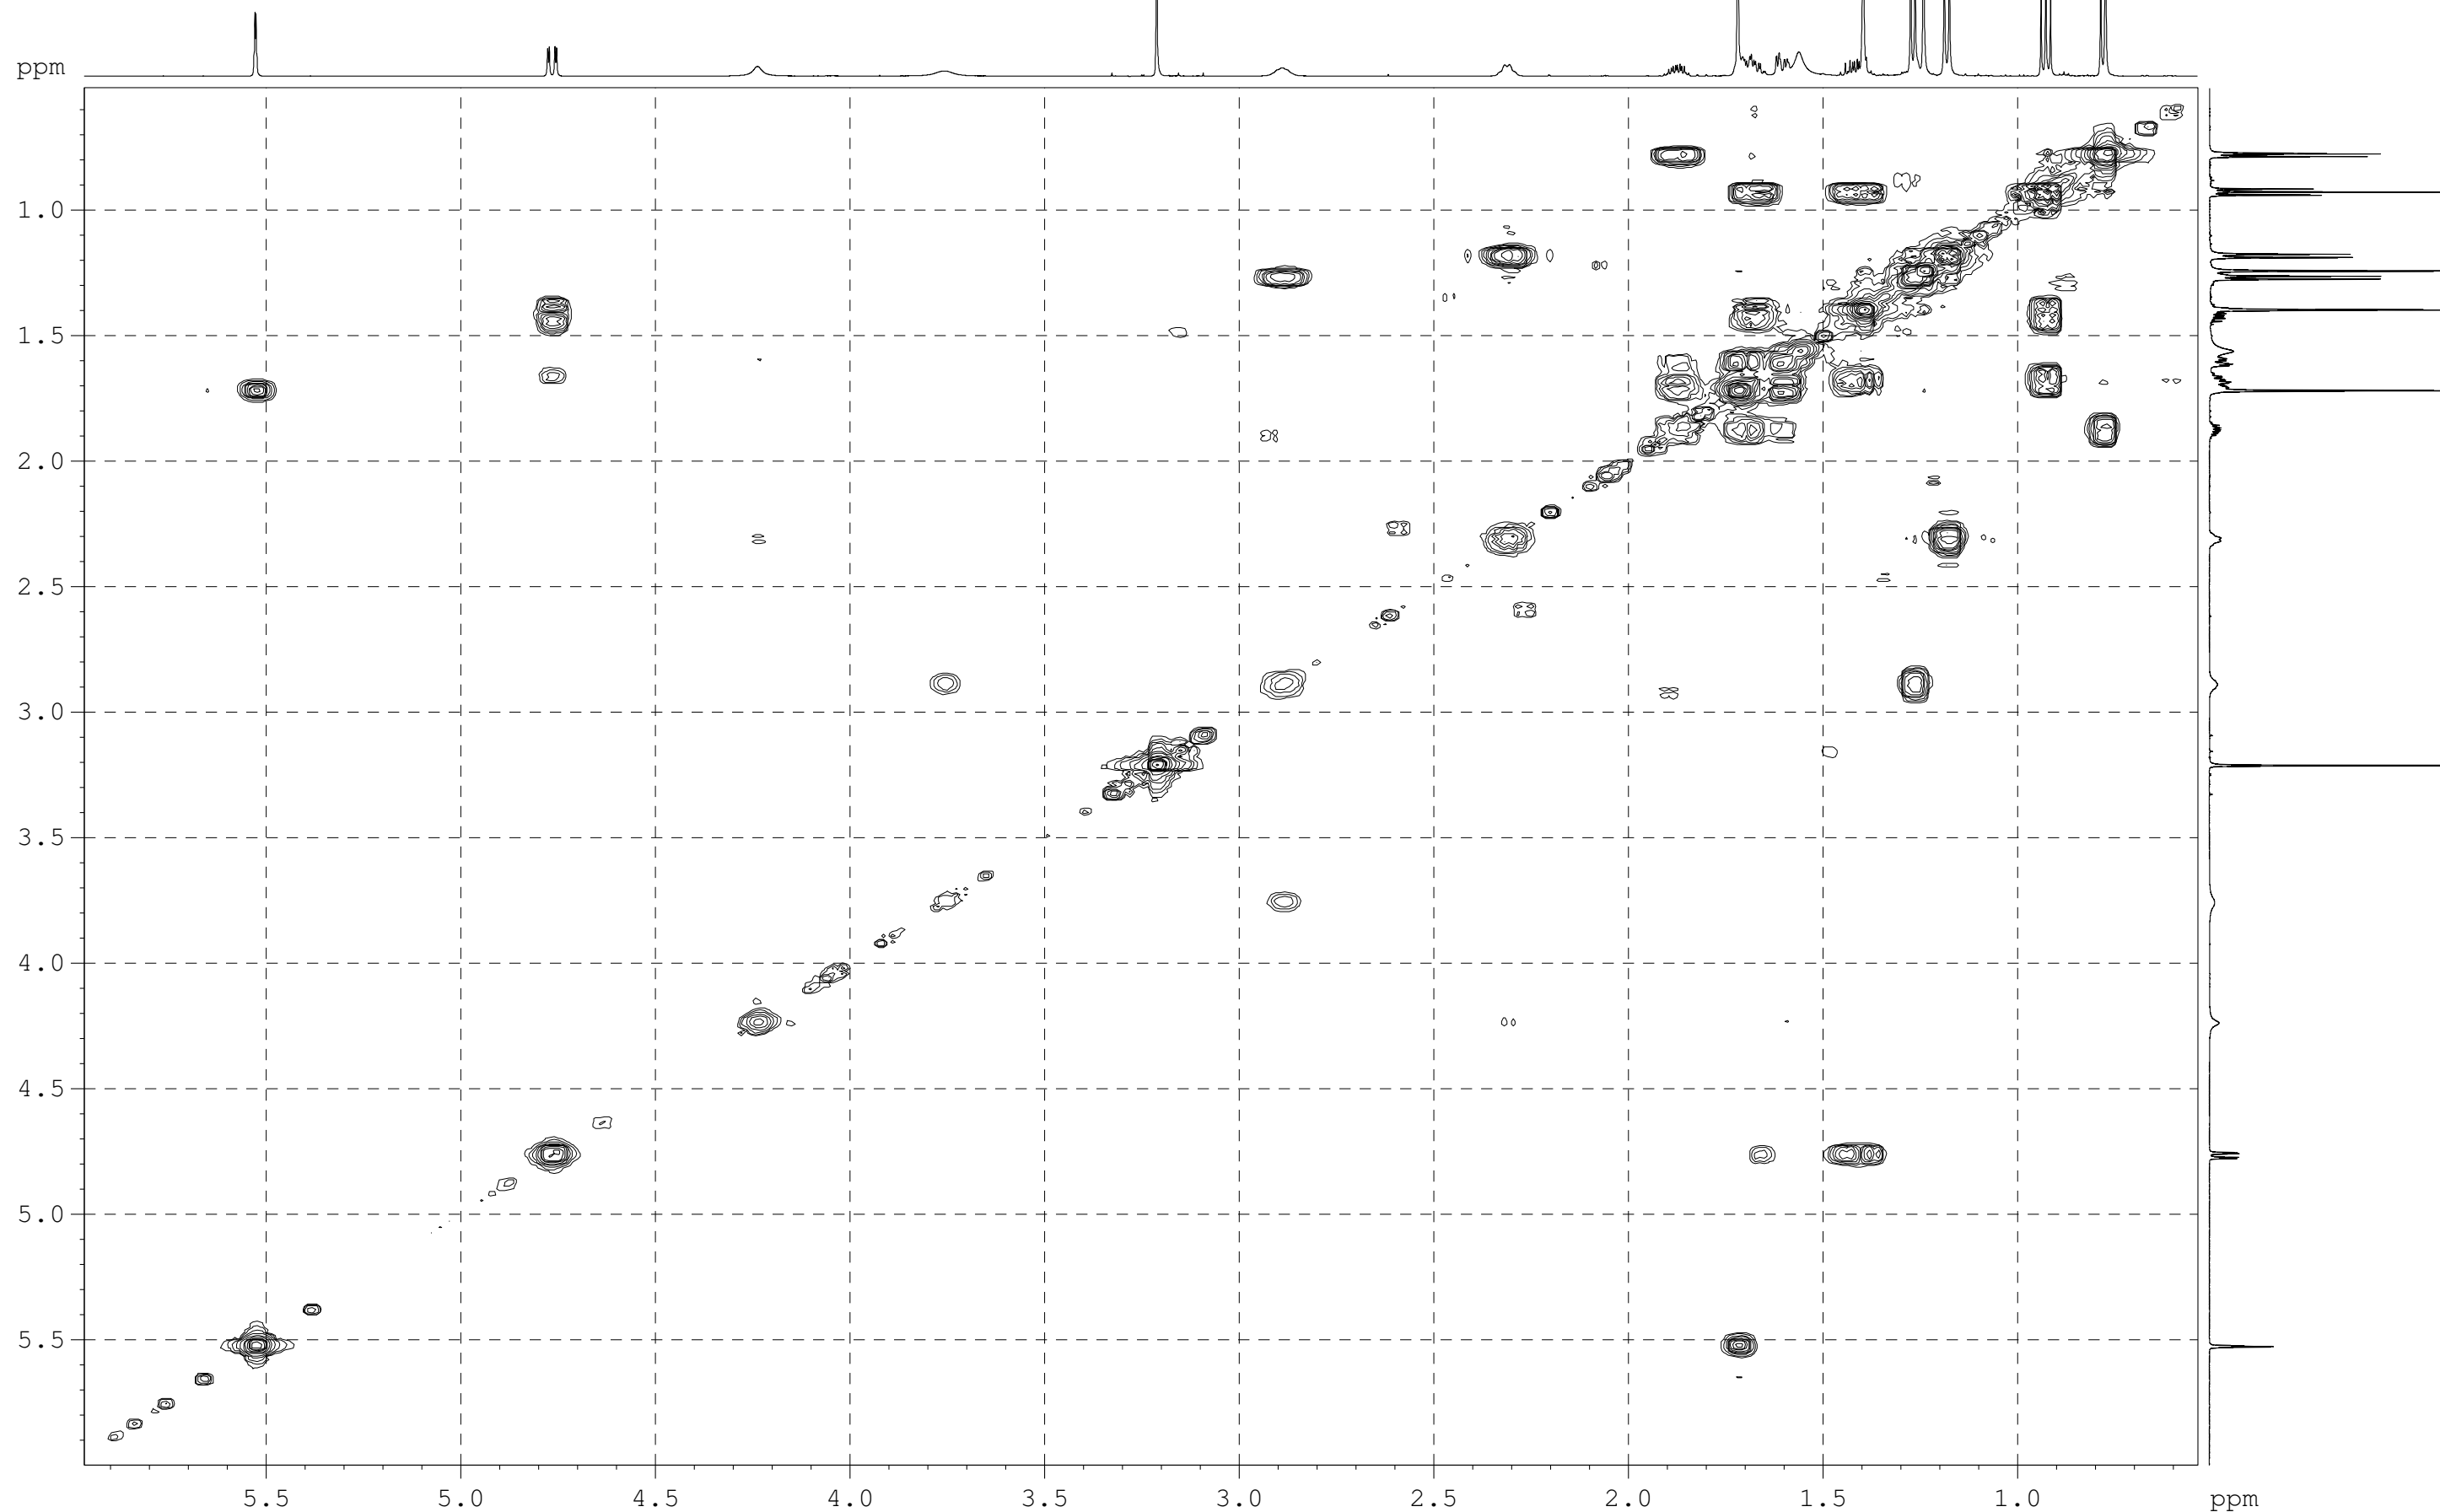

Supplement: Additional file 3 [file 1860-5397-11-157-S3.zip]

**Compound 4**  
**DMSO**

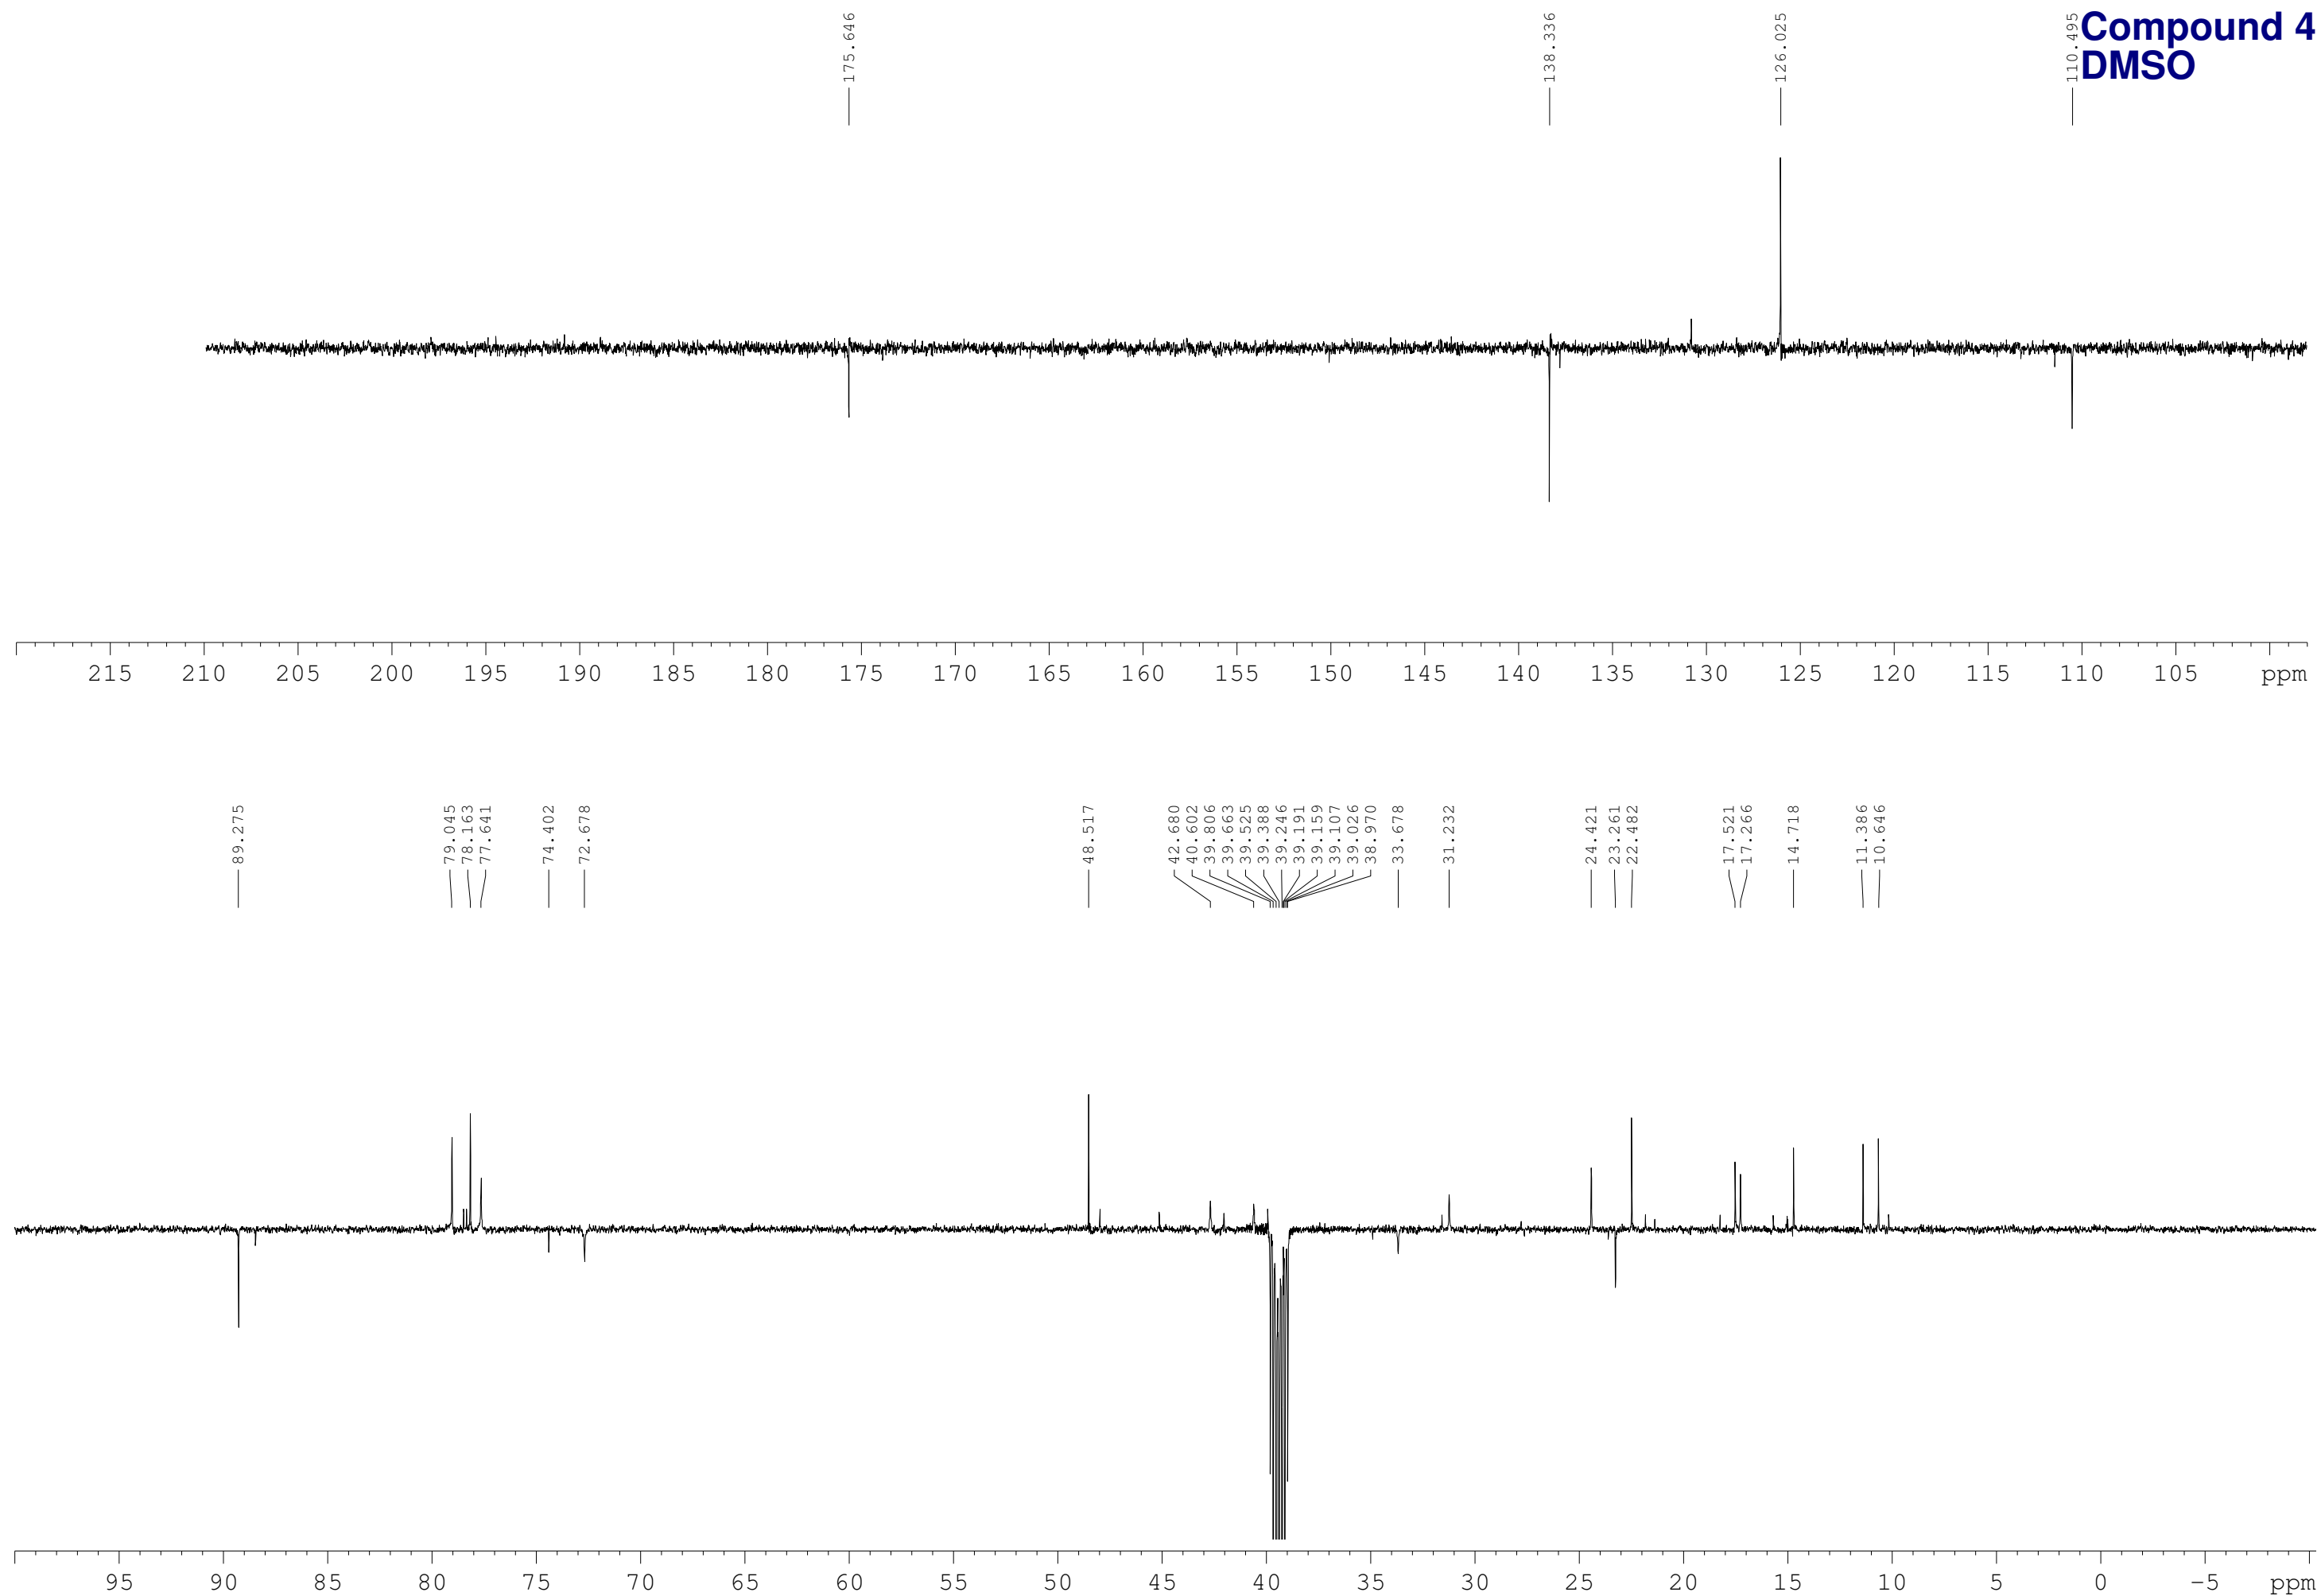

Supplement: Additional file 3 [file 1860-5397-11-157-S3.zip]

Compound 3  
CDCl<sub>3</sub>

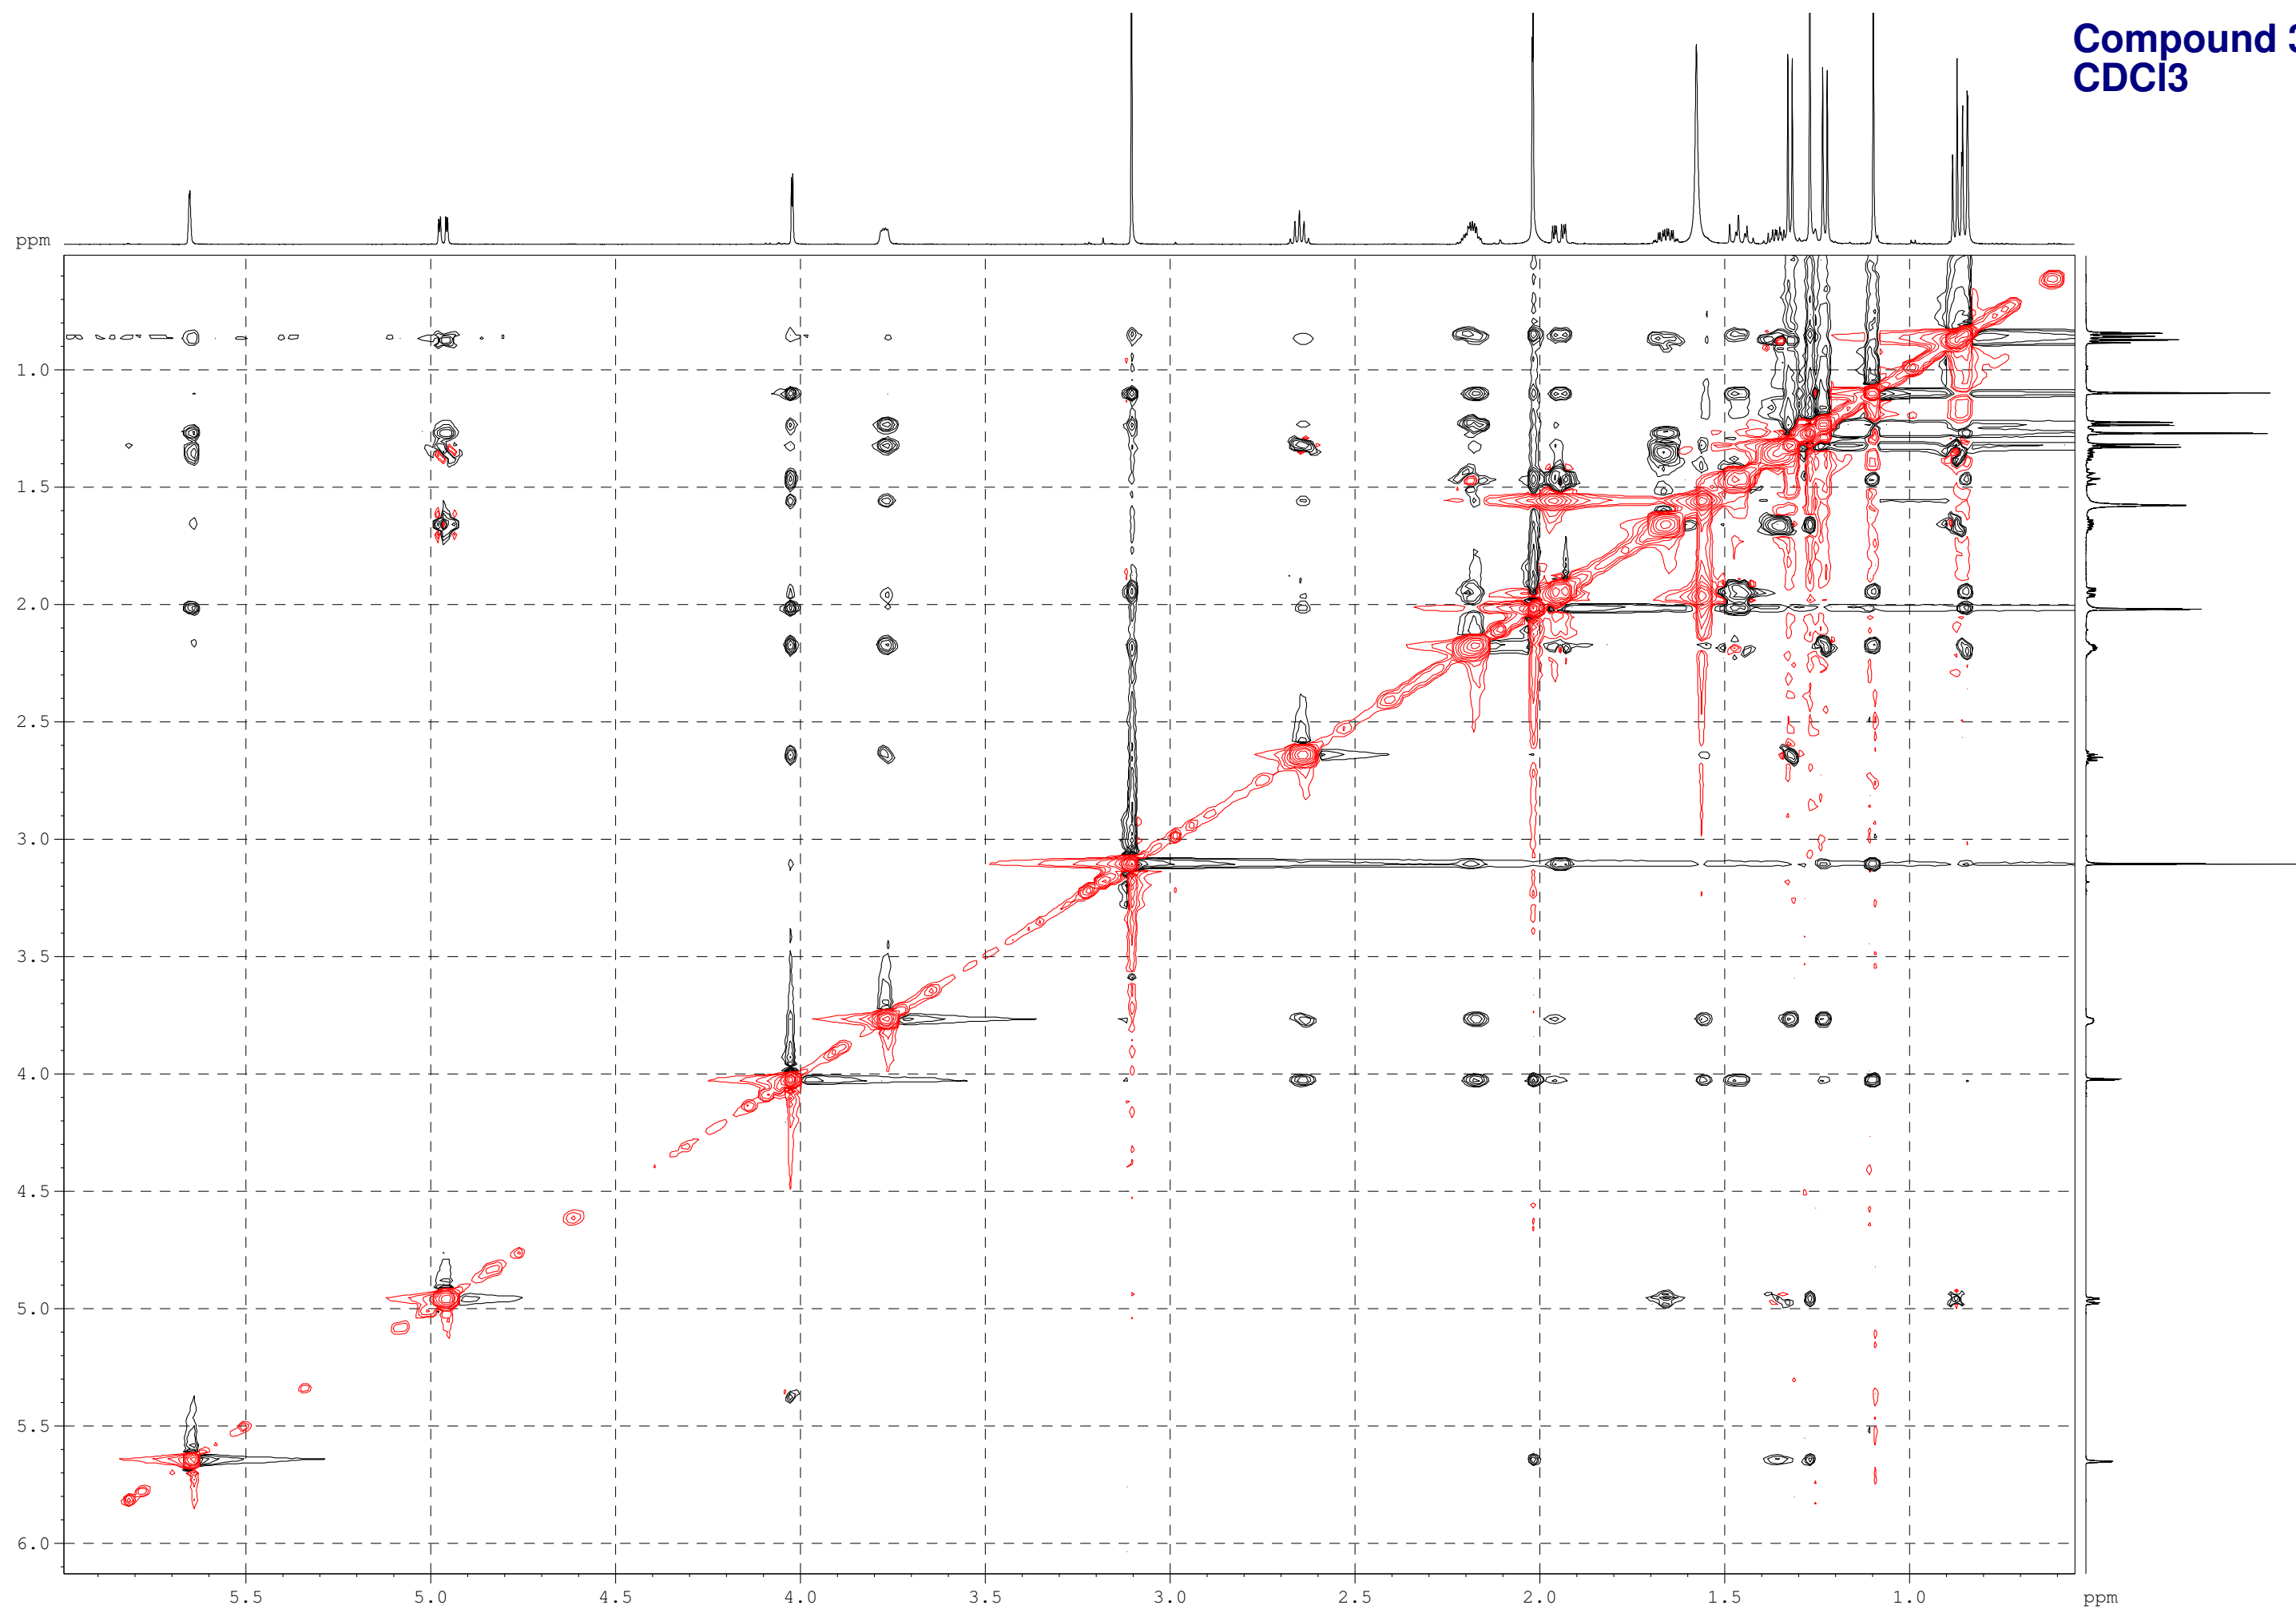

Supplement: Additional file 3 [file 1860-5397-11-157-S3.zip]

Compound 2  
DMSO

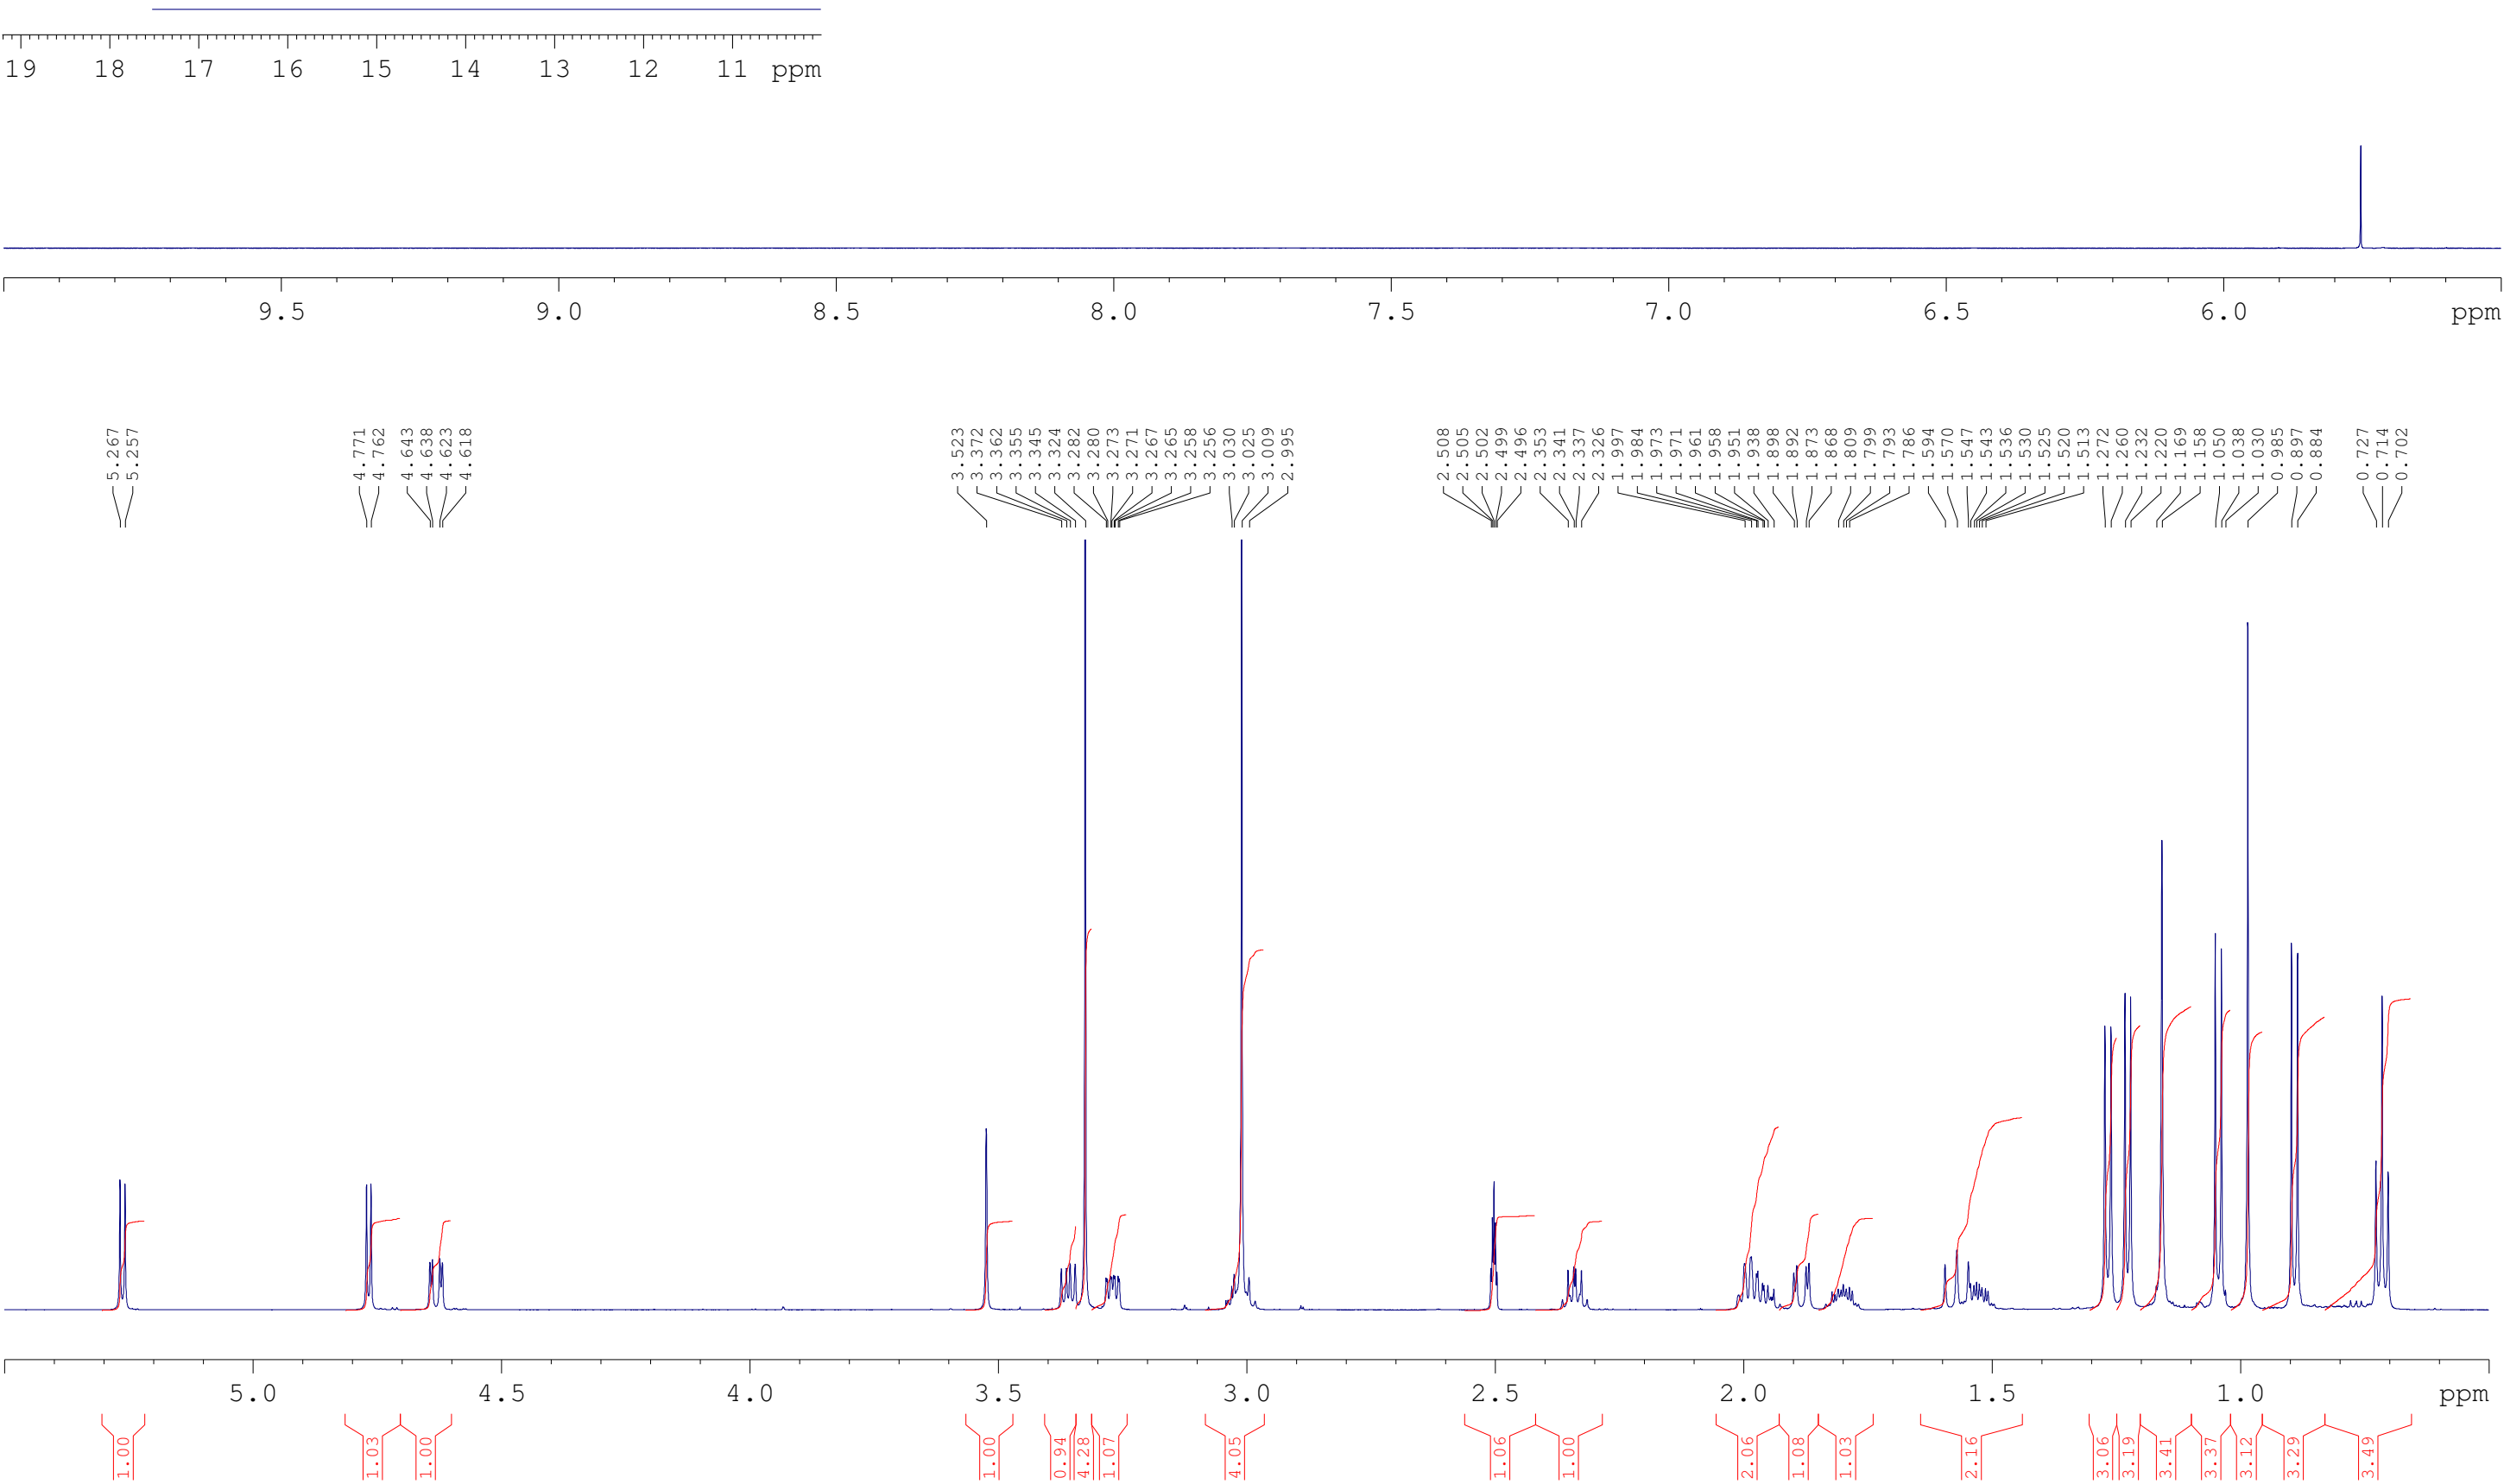

5.753

Supplement: Additional file 3 [file 1860-5397-11-157-S3.zip]

Compound 2  
DMSO

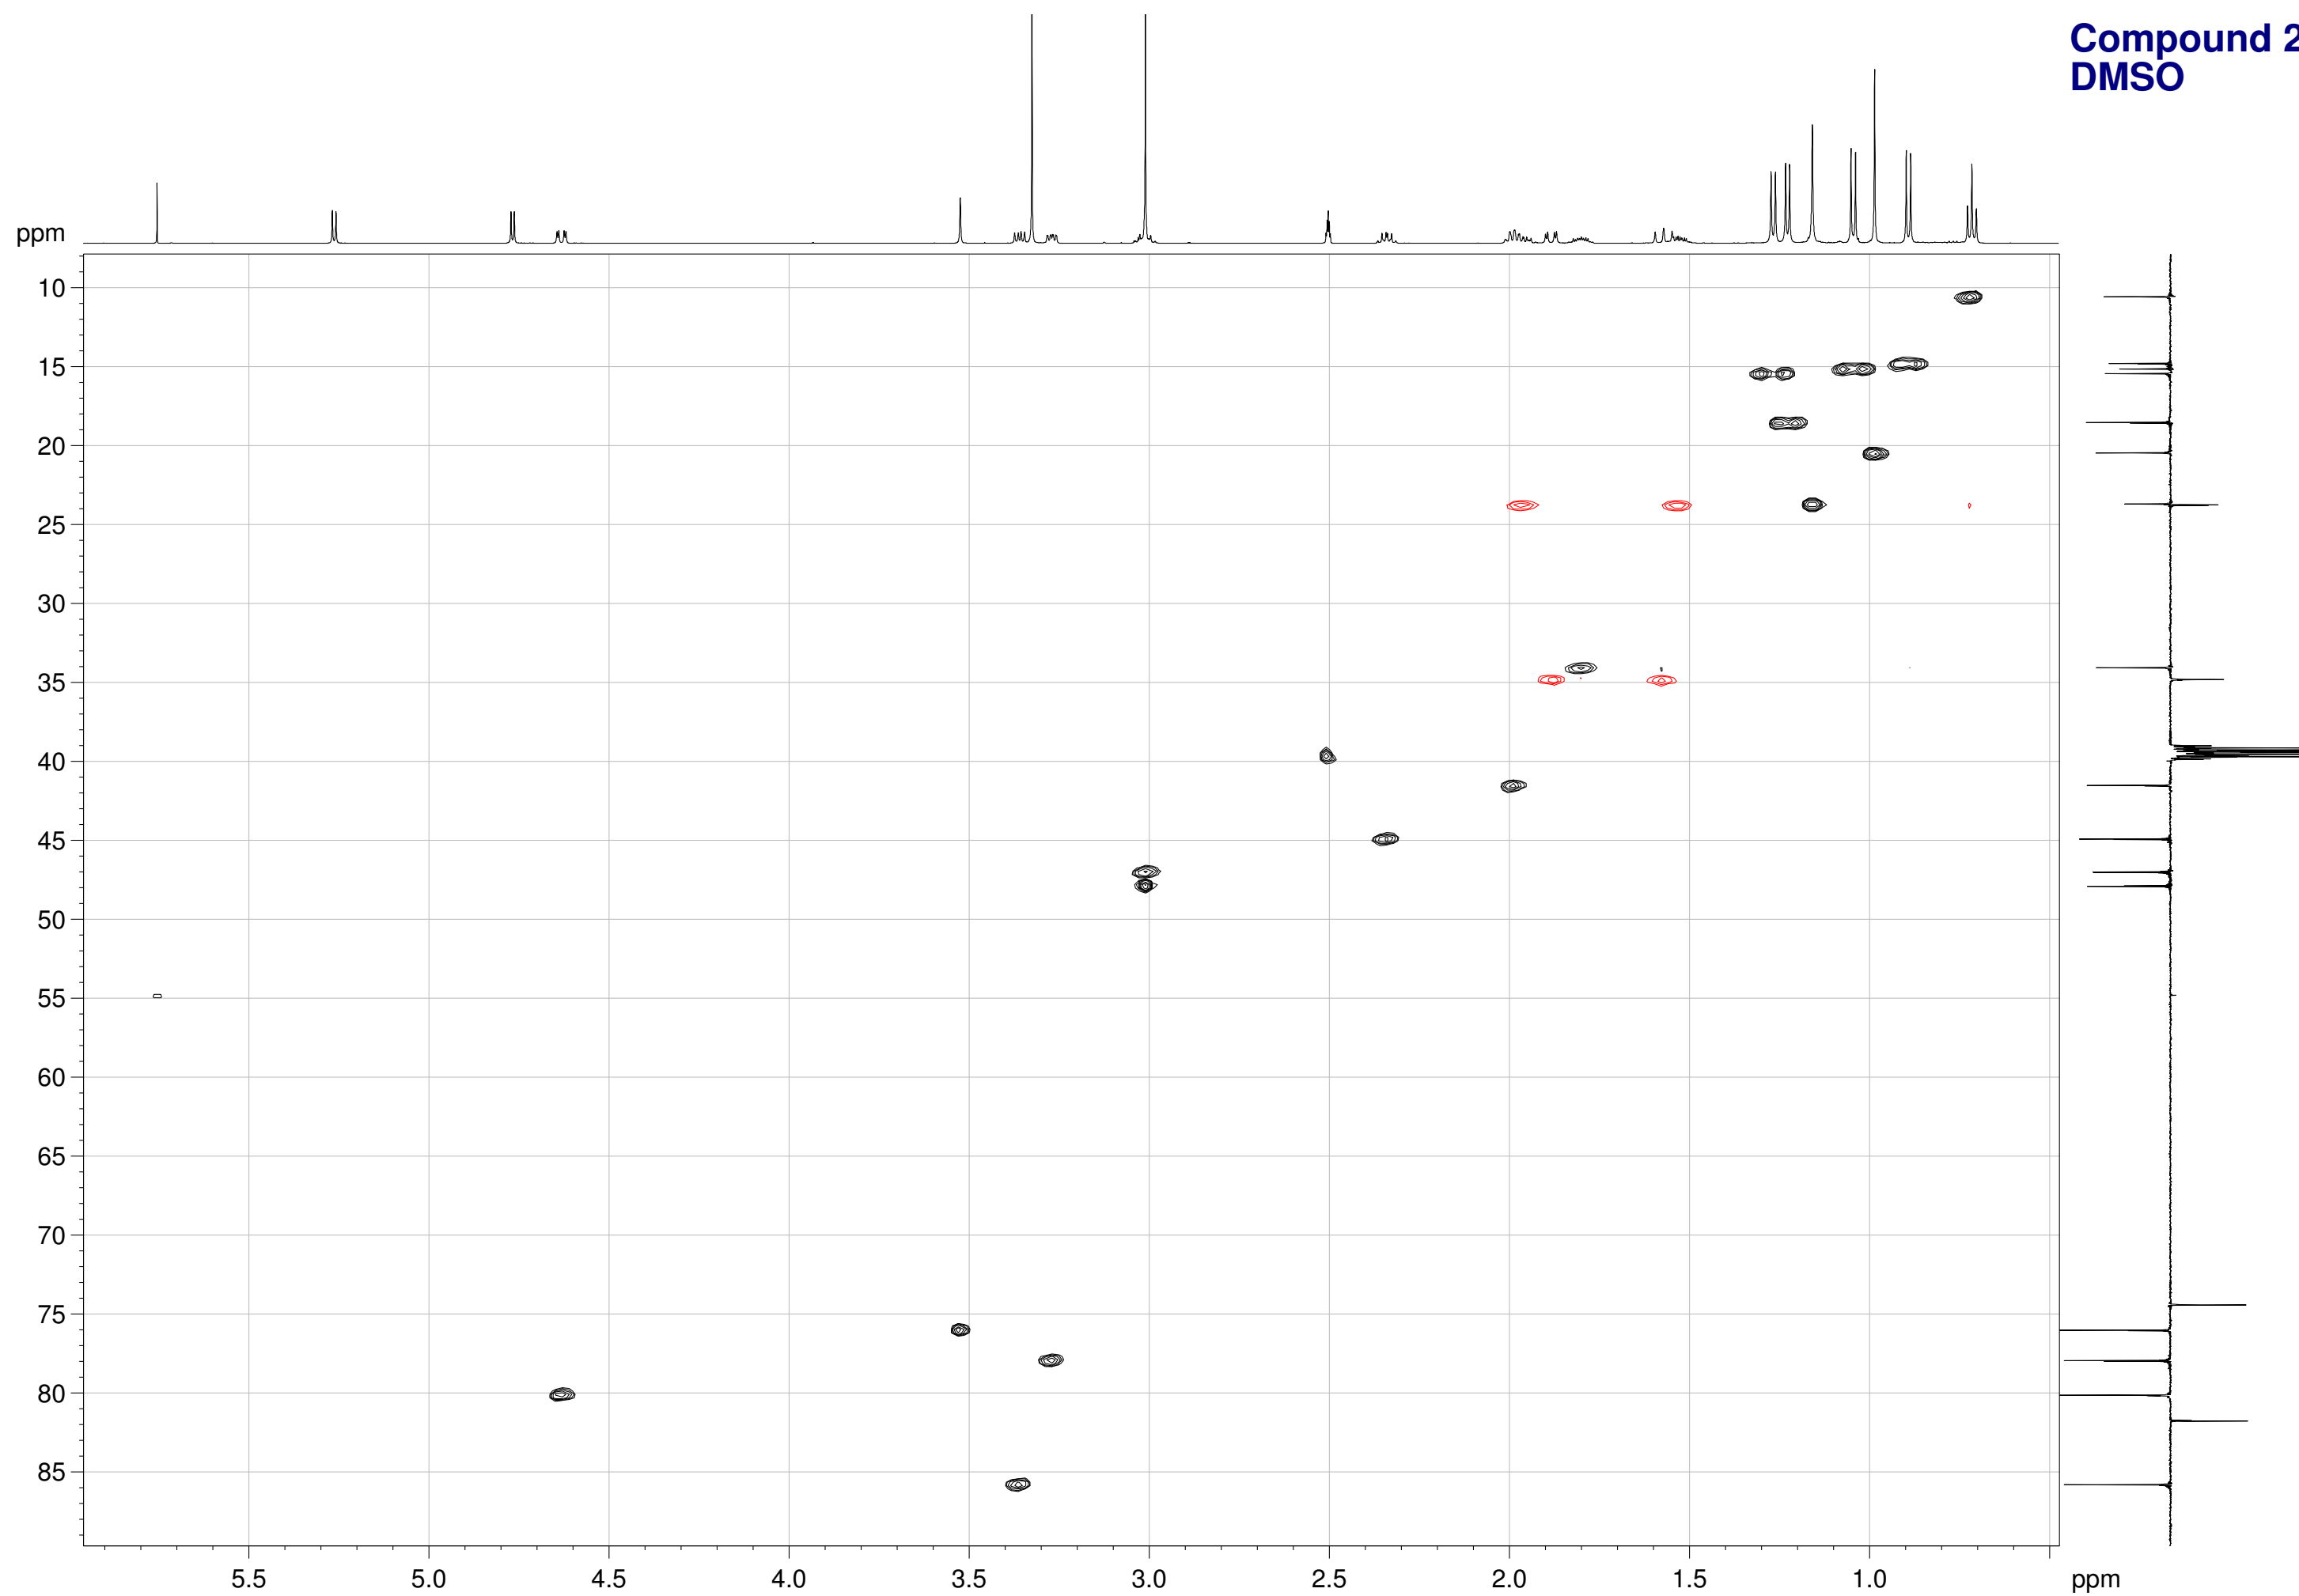

Supplement: Additional file 3 [file 1860-5397-11-157-S3.zip]

Compound 3  
CDCl<sub>3</sub>

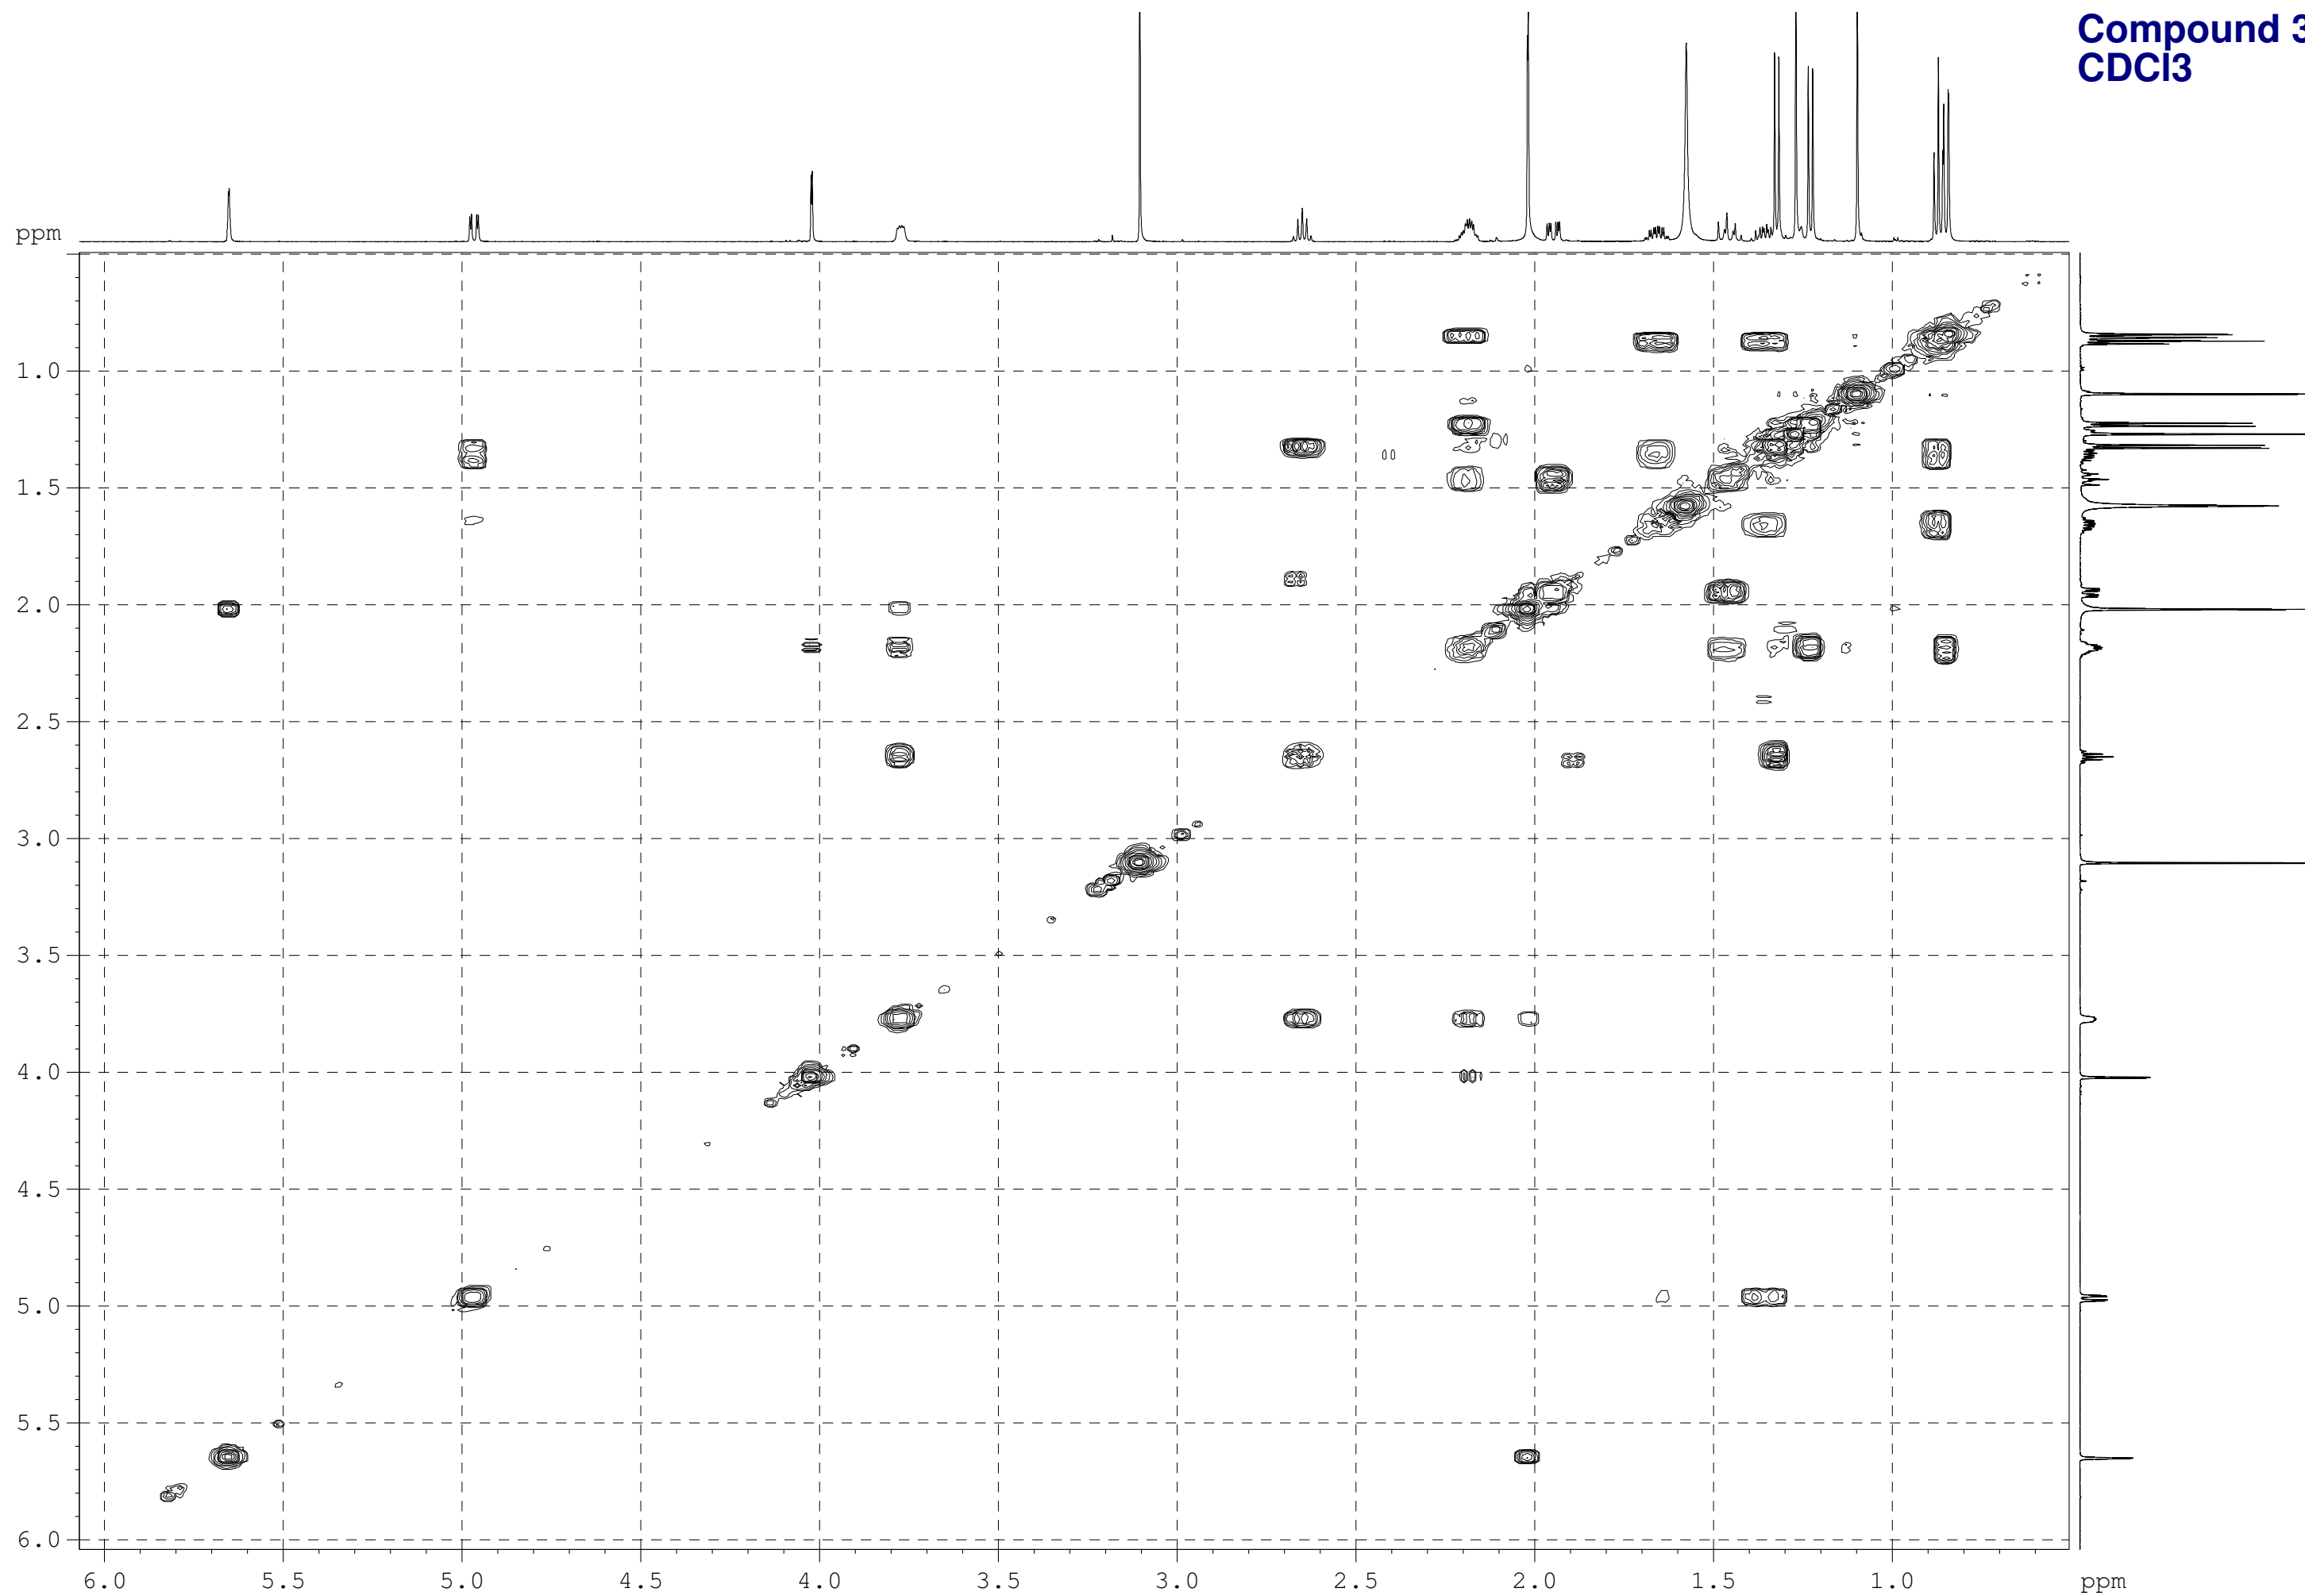

Supplement: Additional file 3 [file 1860-5397-11-157-S3.zip]

Compound 4  
CDCl<sub>3</sub>

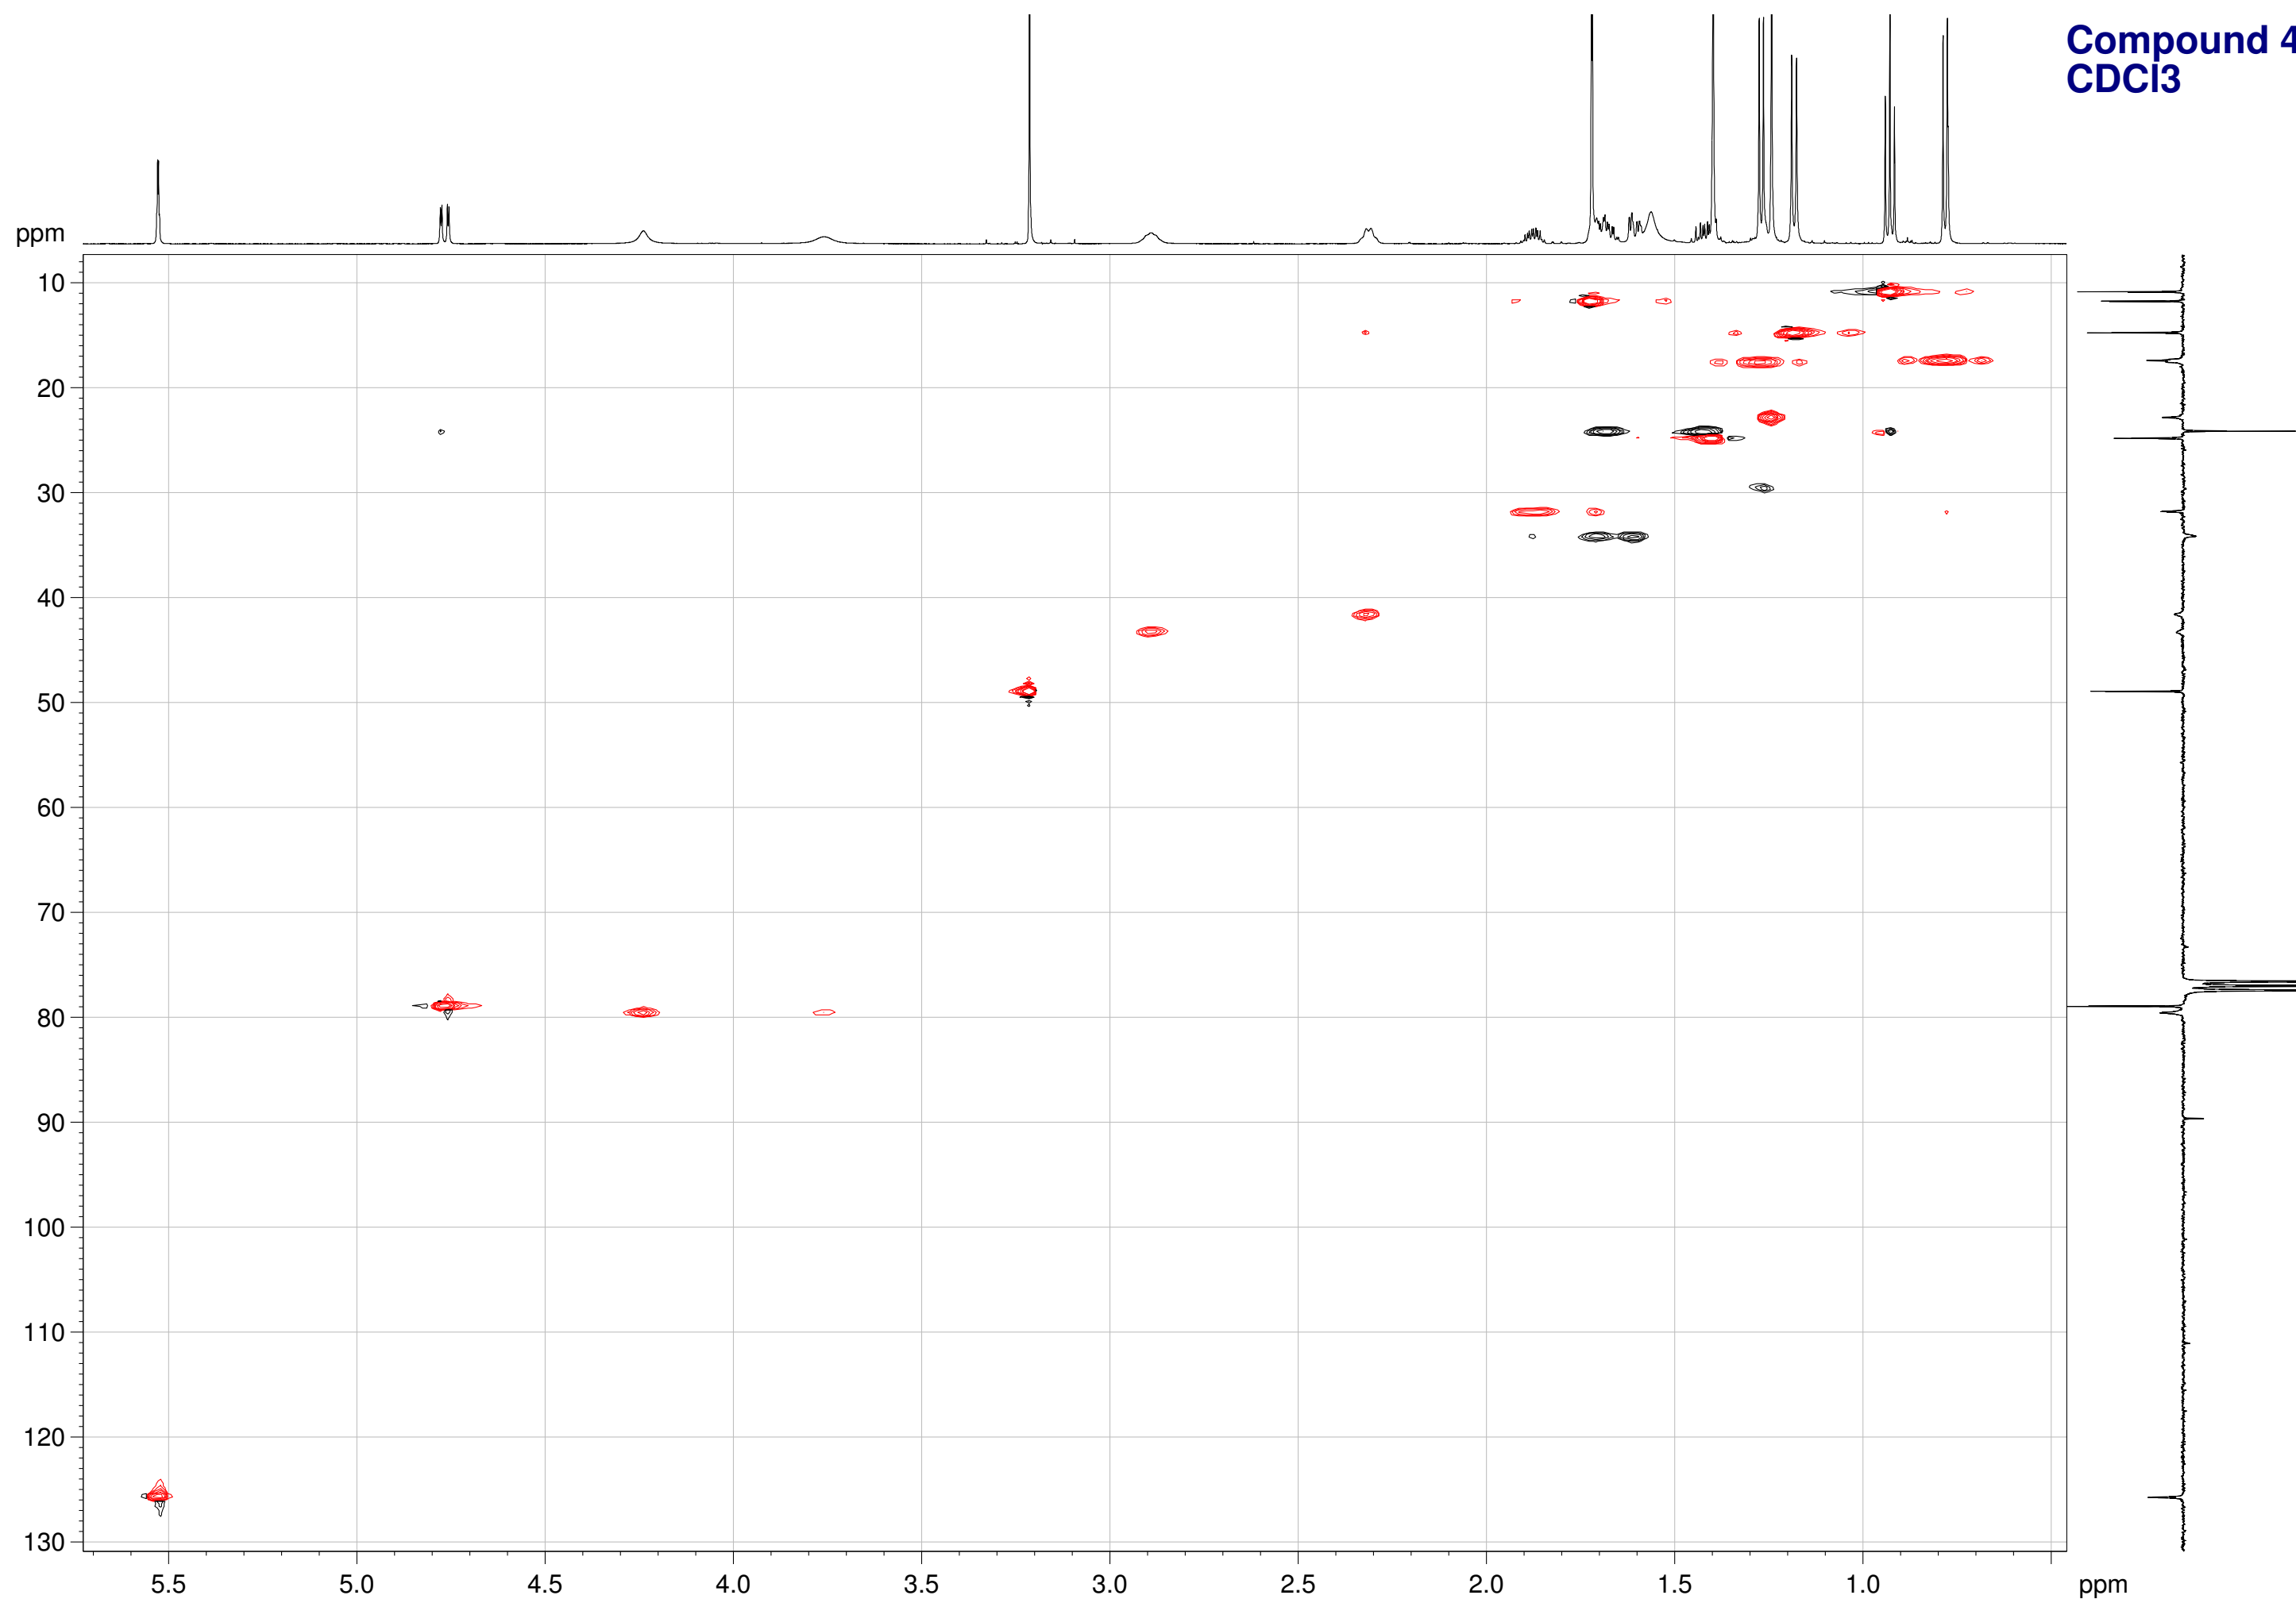

Supplement: Additional file 3 [file 1860-5397-11-157-S3.zip]

Compound 4  
CDCl<sub>3</sub>

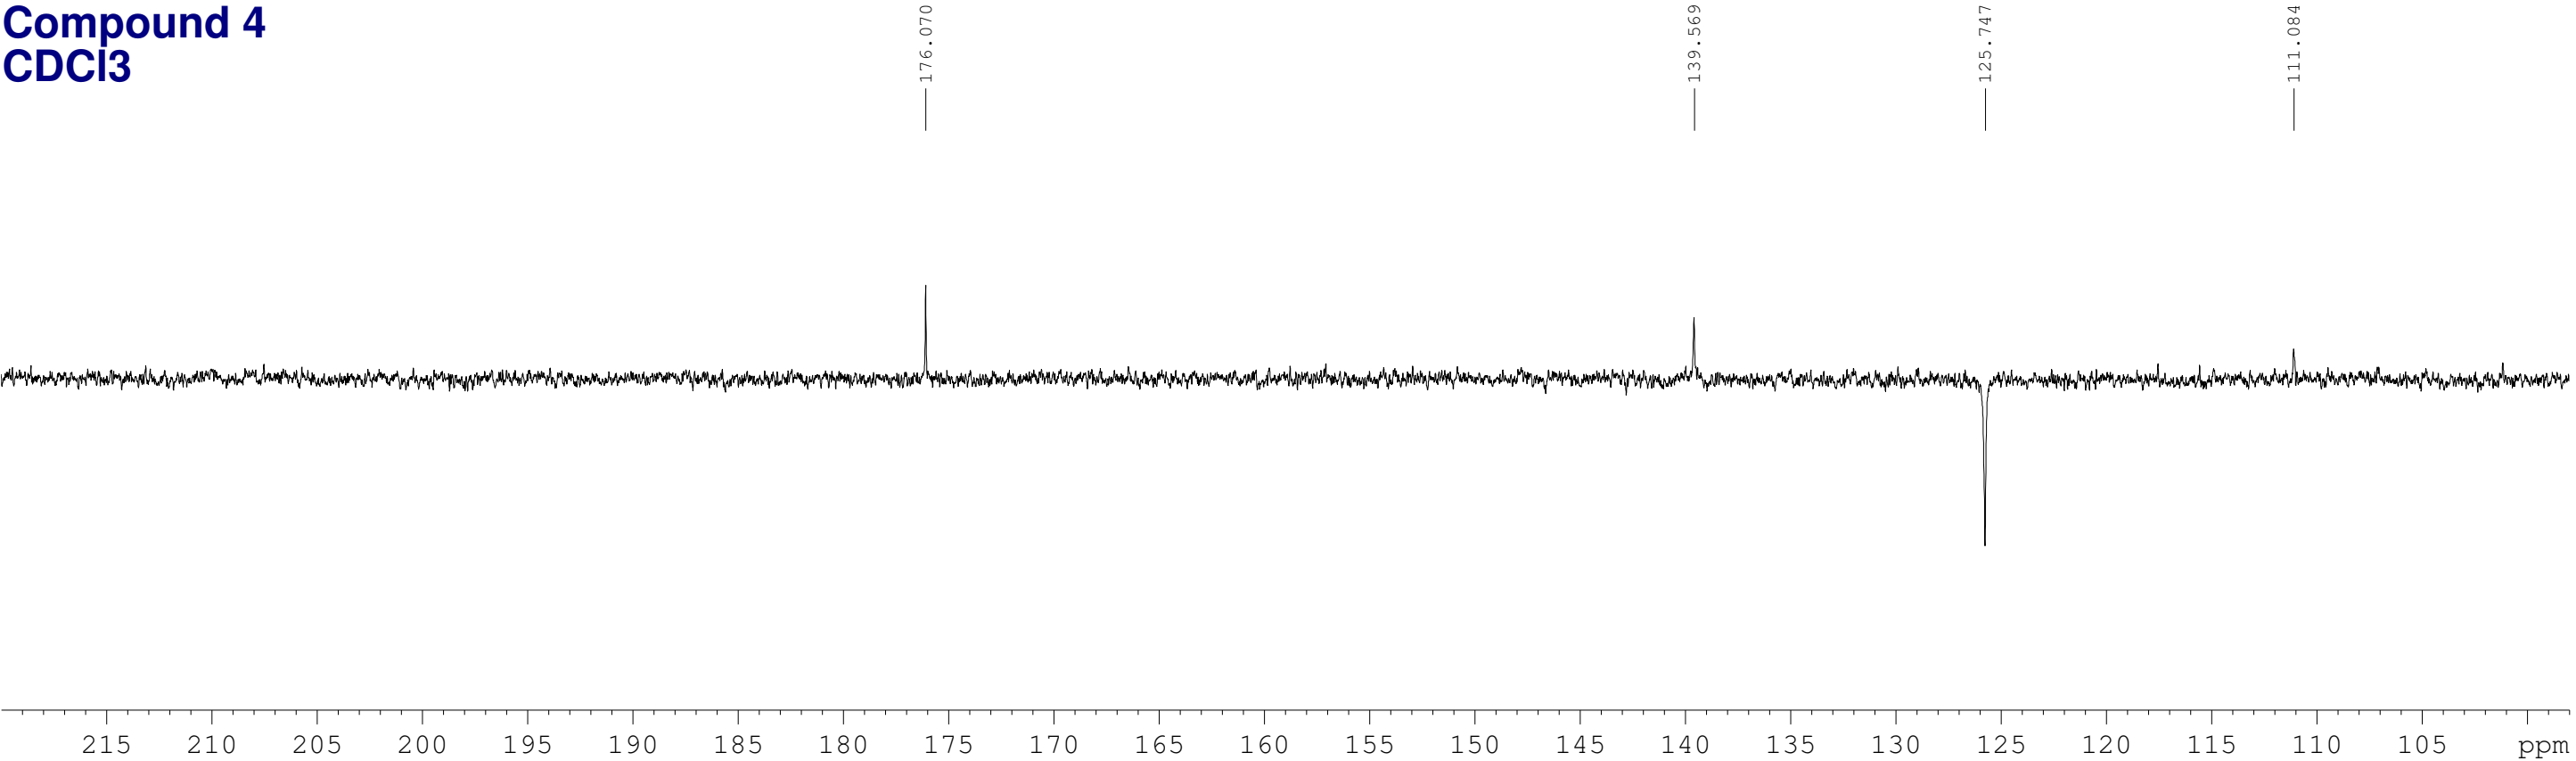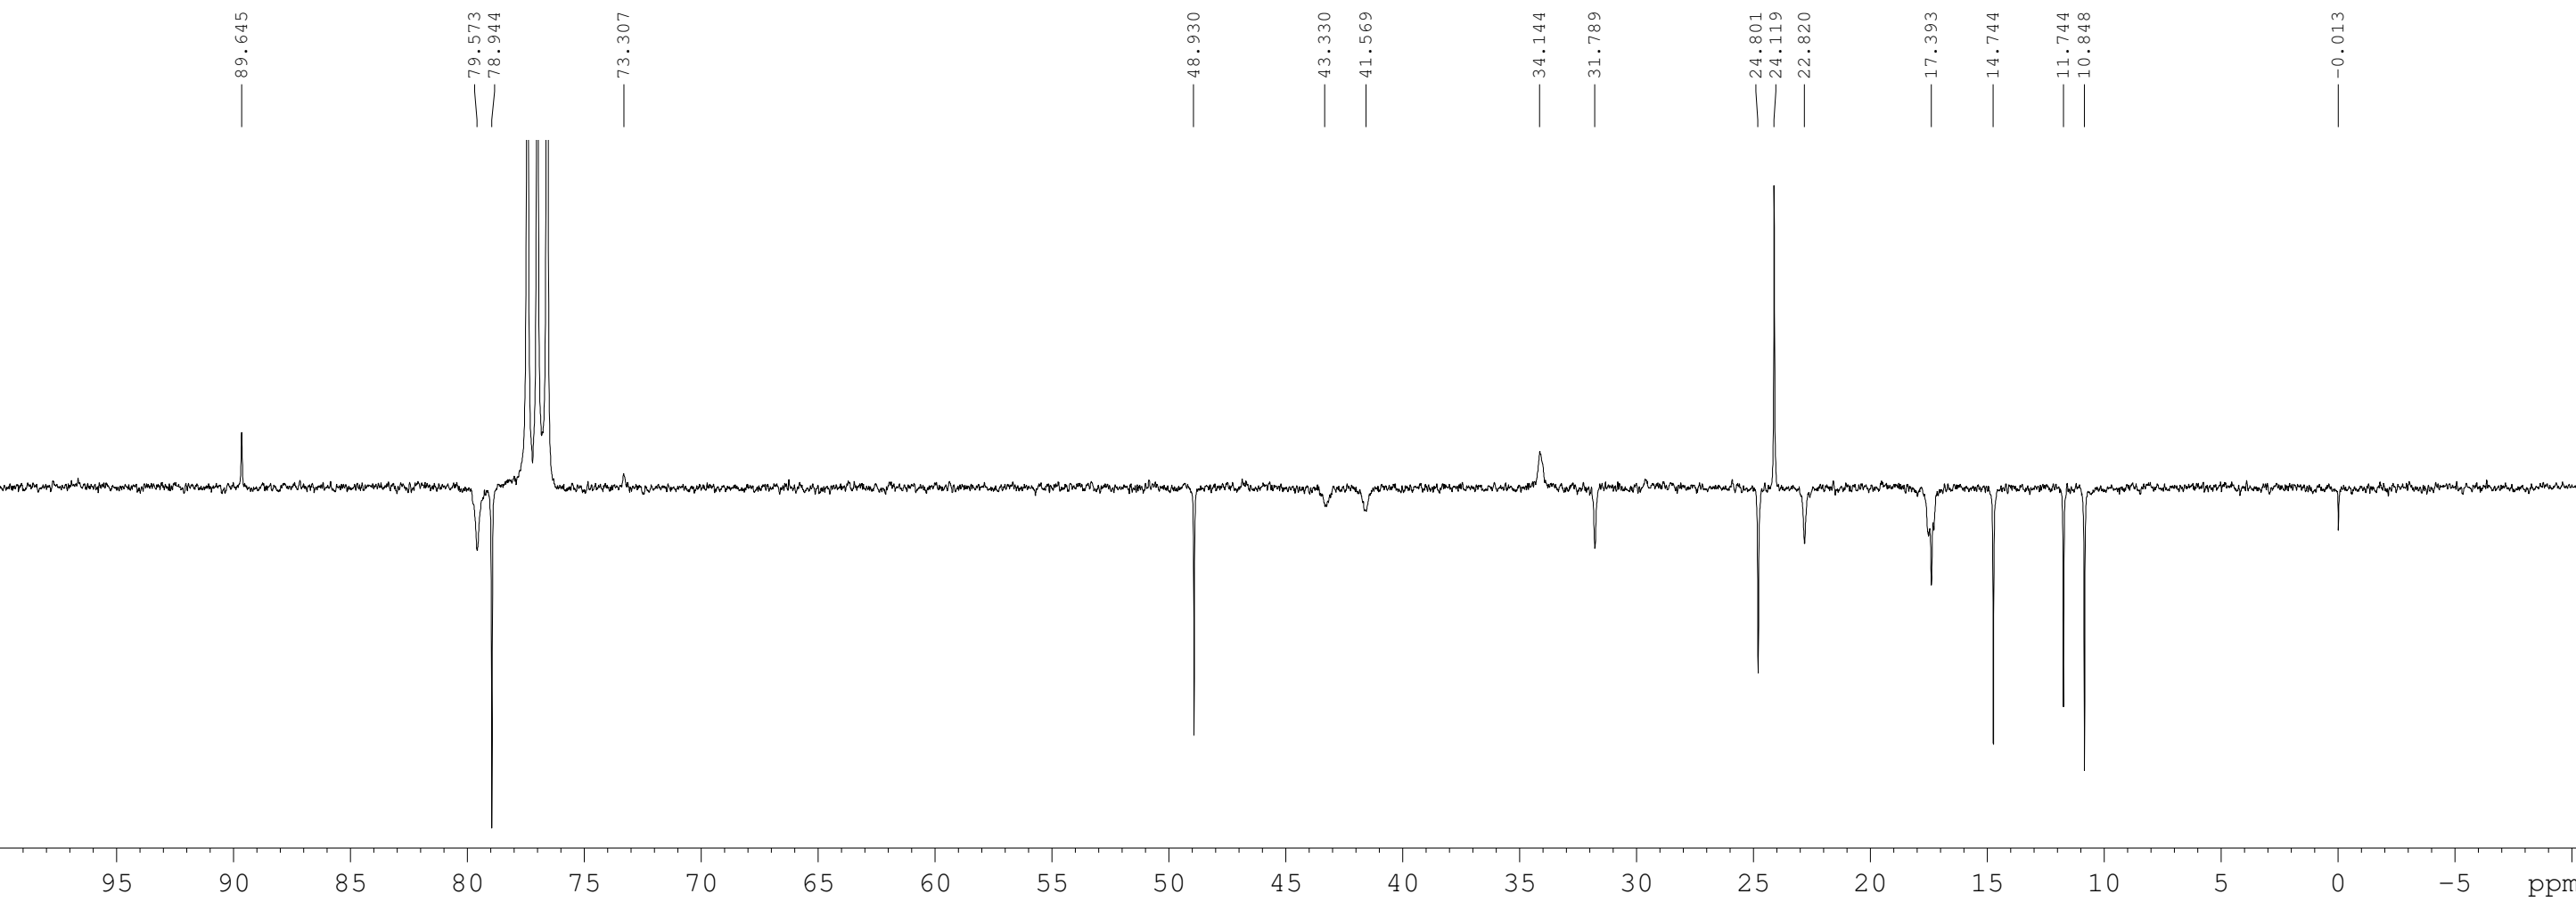

Supplement: Additional file 3 [file 1860-5397-11-157-S3.zip]

**Compound 4**  
**DMSO**

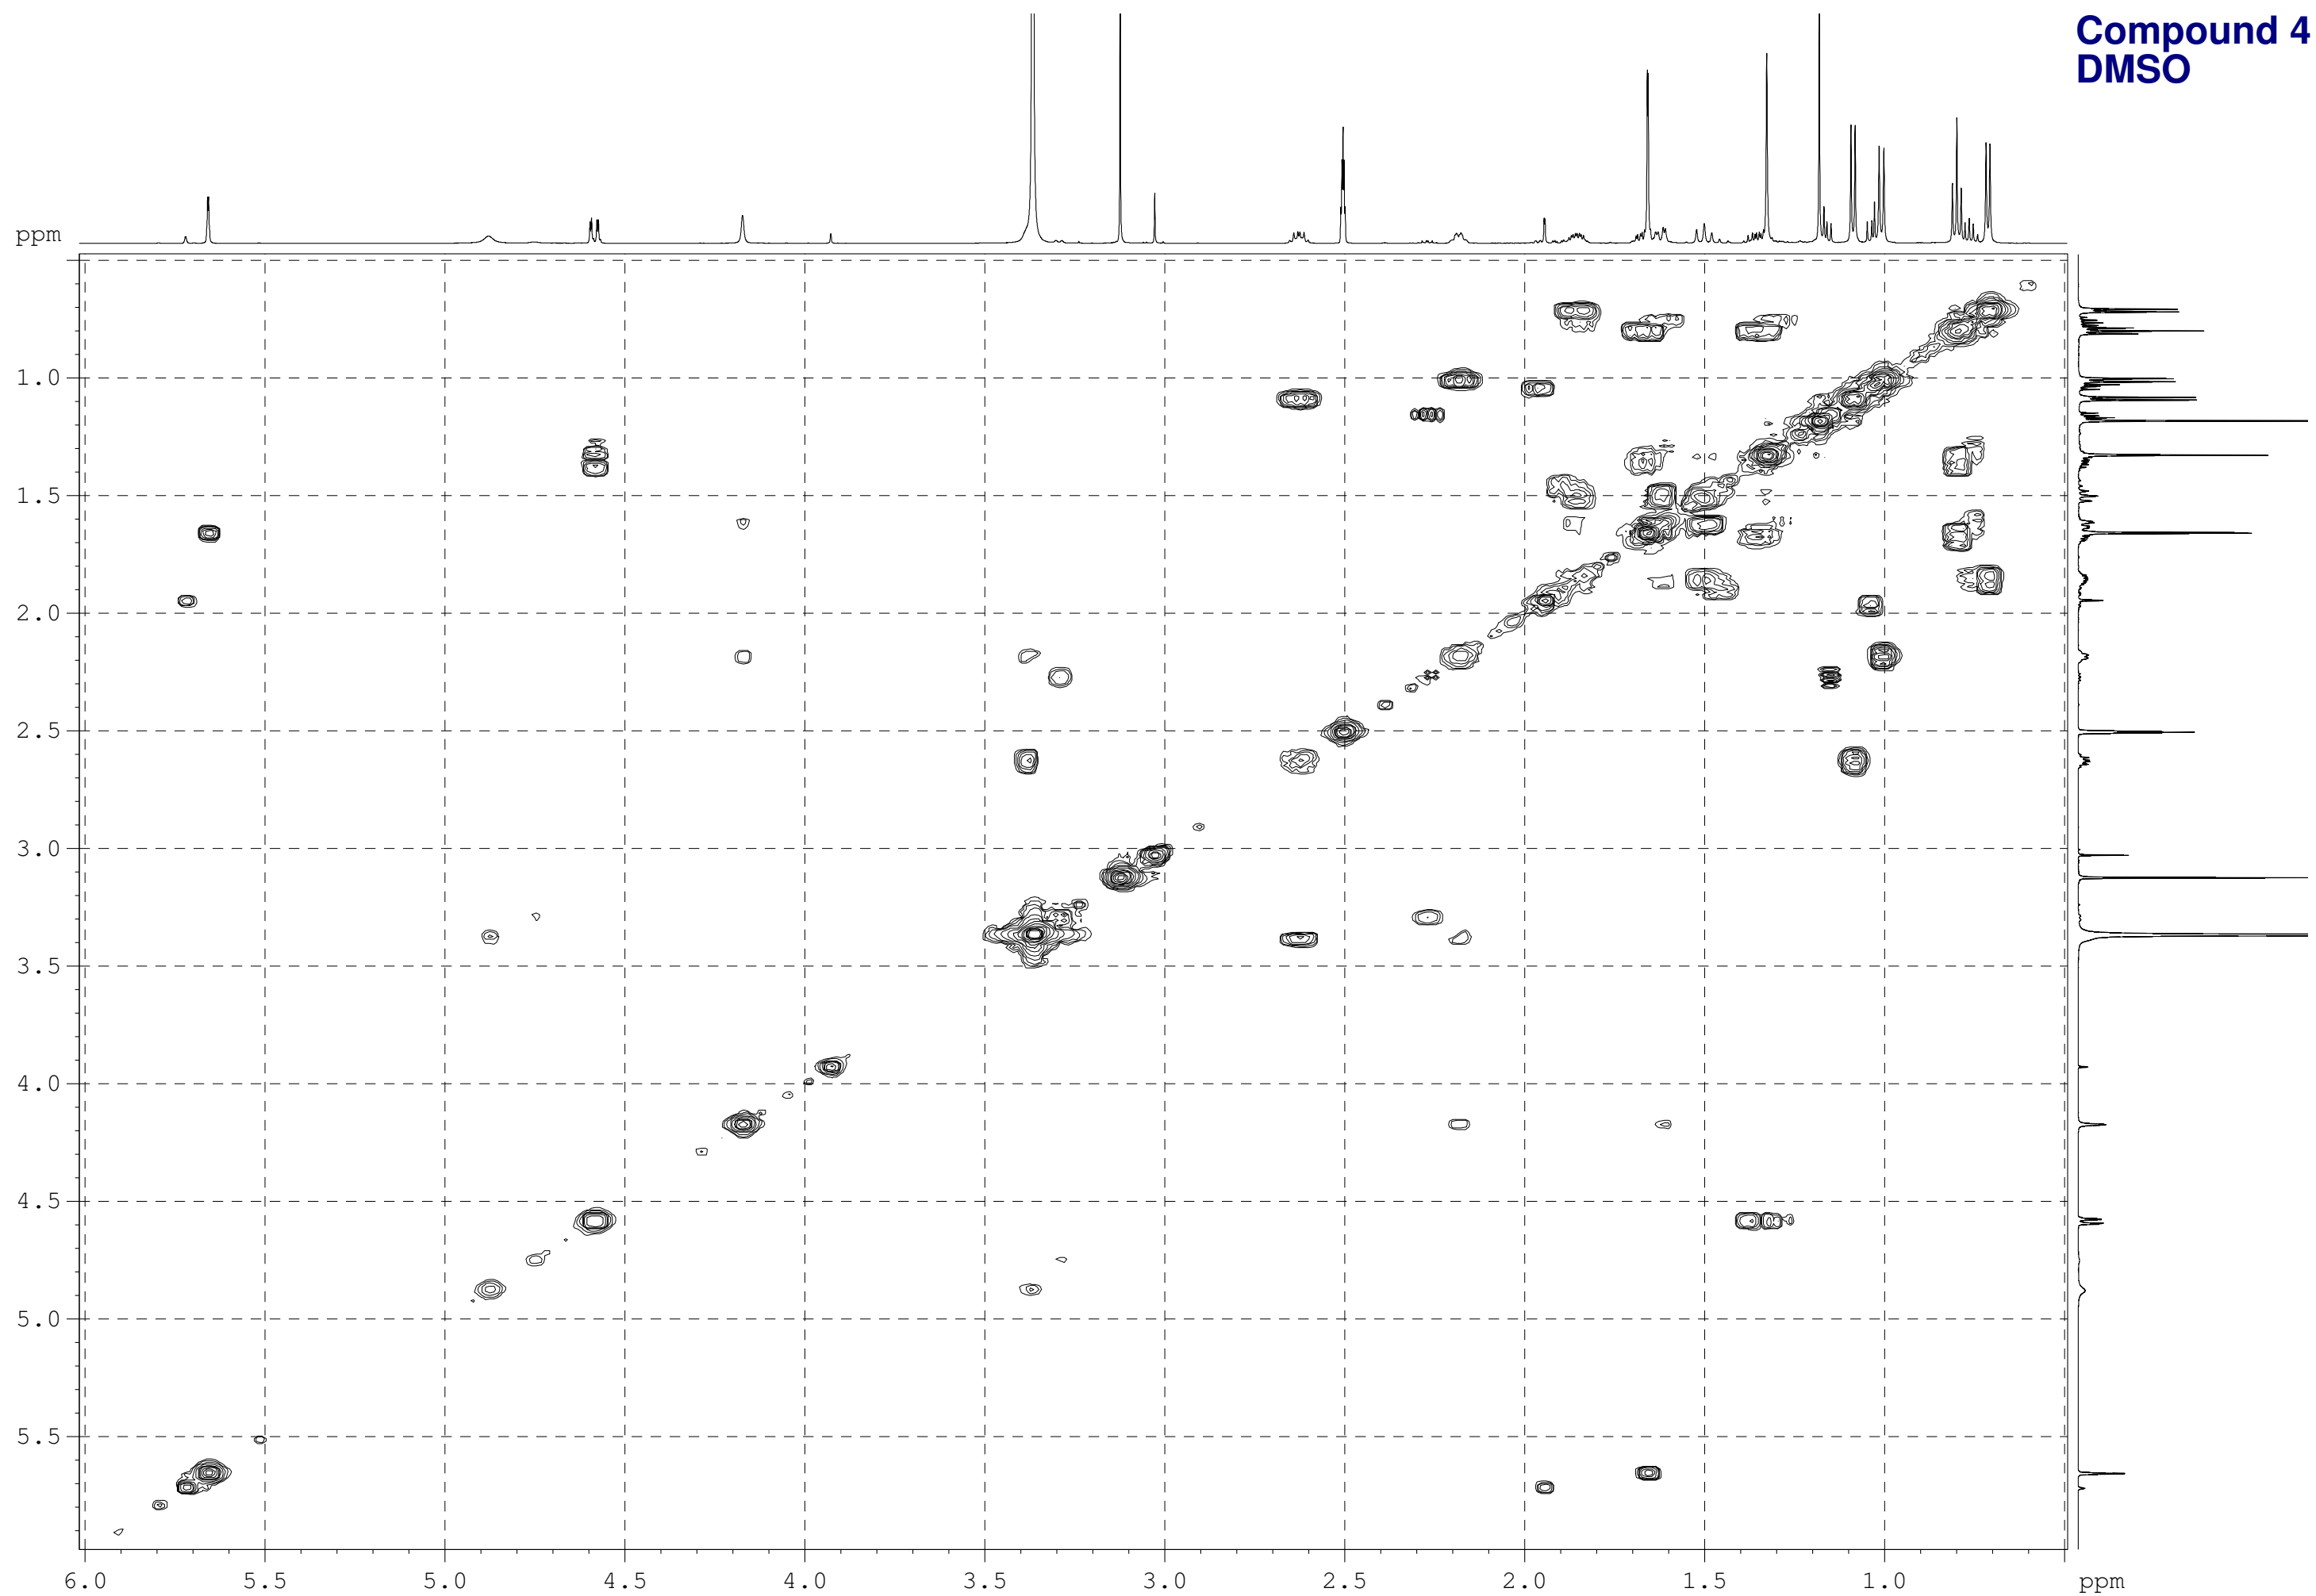

Supplement: Additional file 3 [file 1860-5397-11-157-S3.zip]

Compound 4  
CDCl<sub>3</sub>

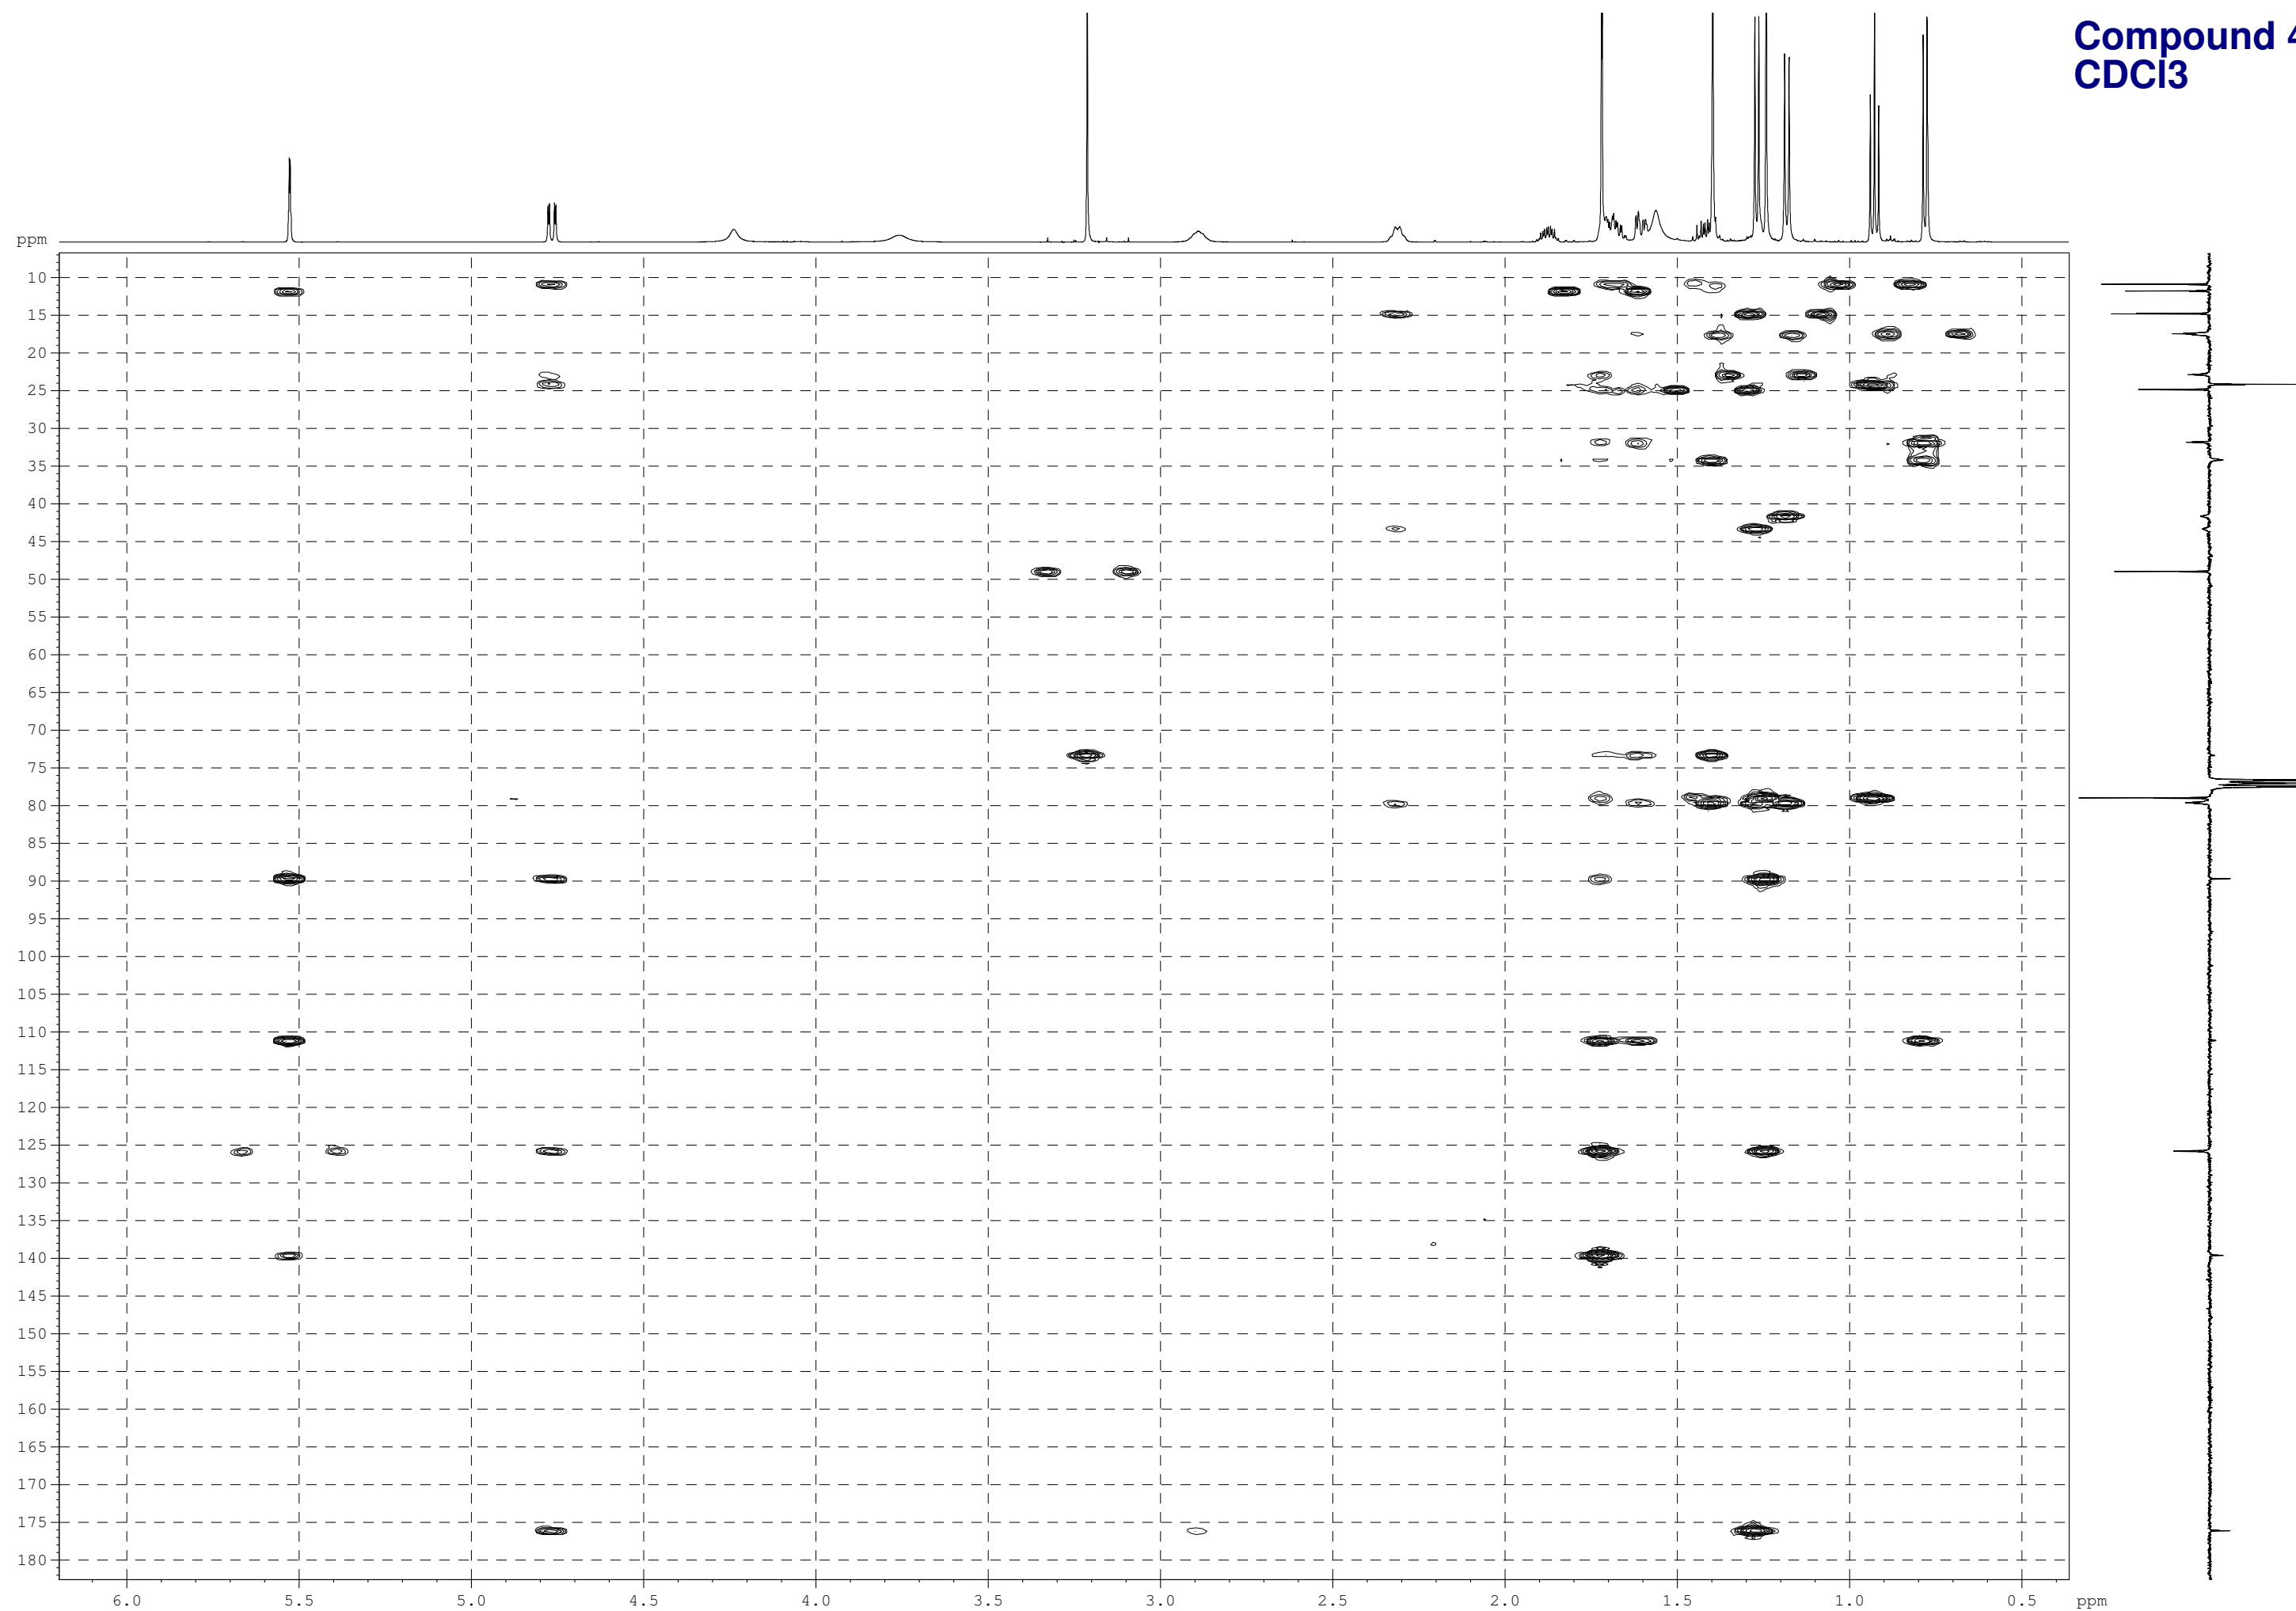

Supplement: Additional file 3 [file 1860-5397-11-157-S3.zip]

Compound 2  
DMSO

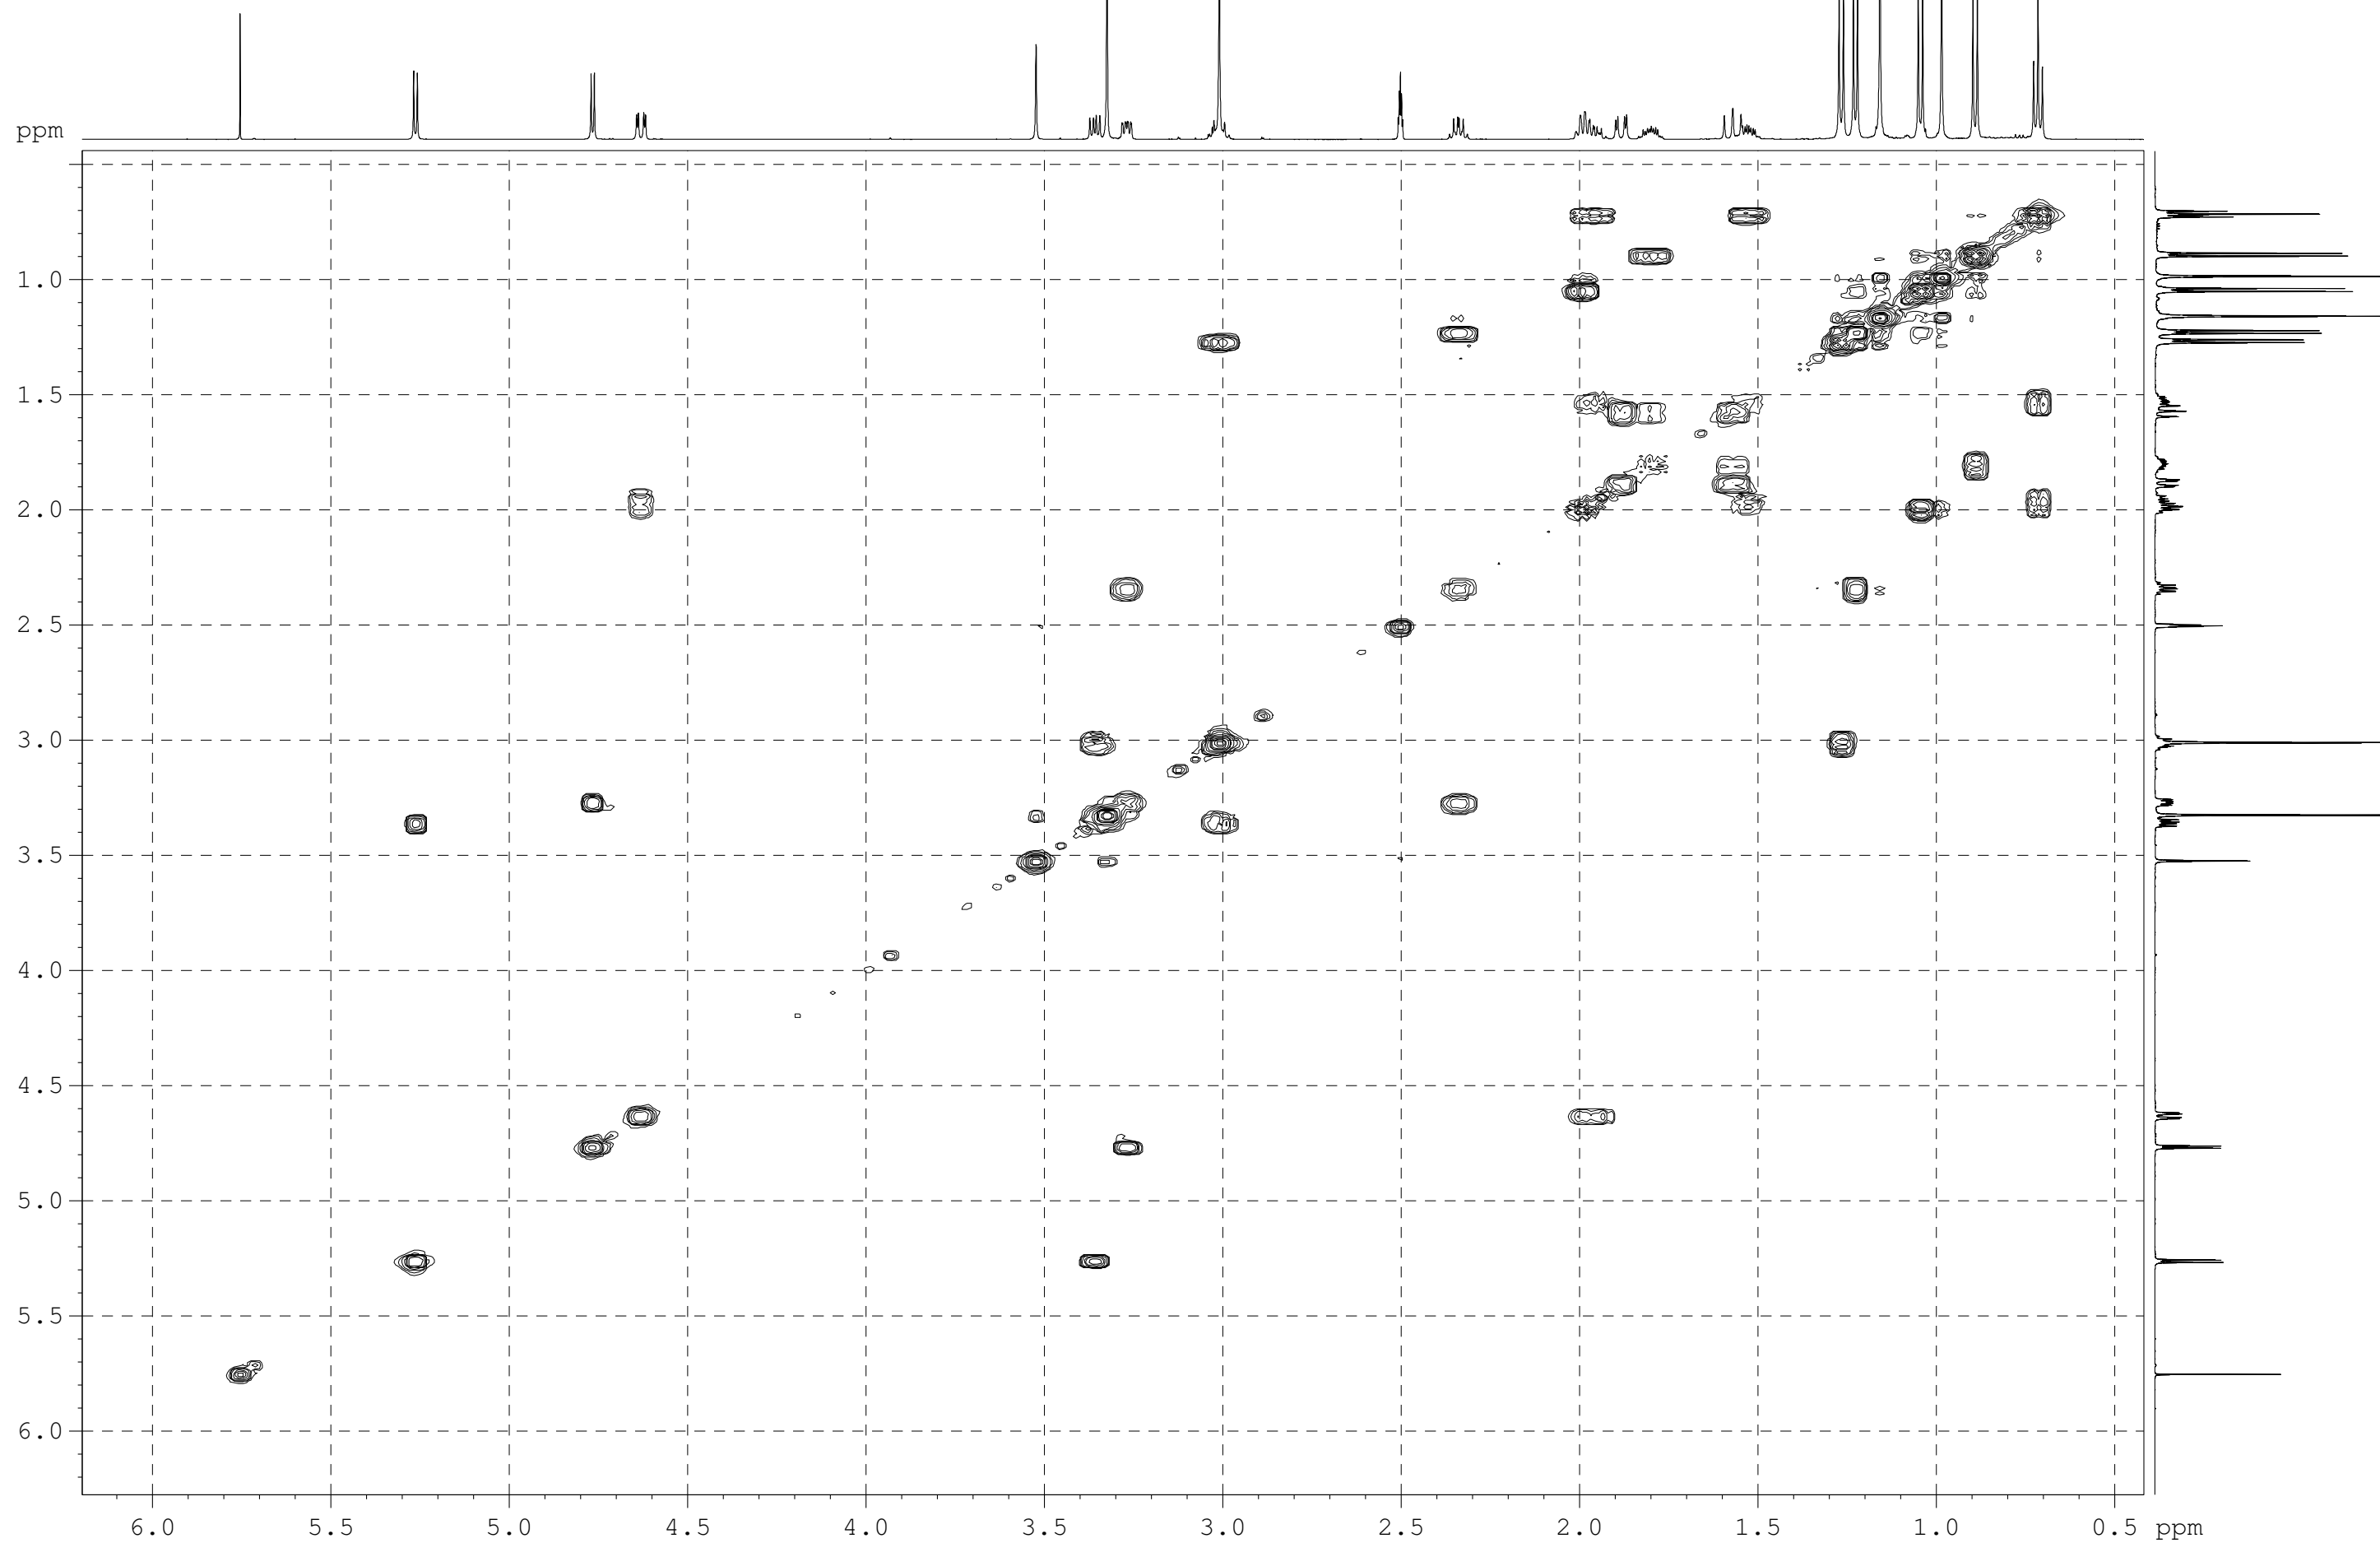

Supplement: Additional file 3 [file 1860-5397-11-157-S3.zip]

Compound 3  
CDCl<sub>3</sub>

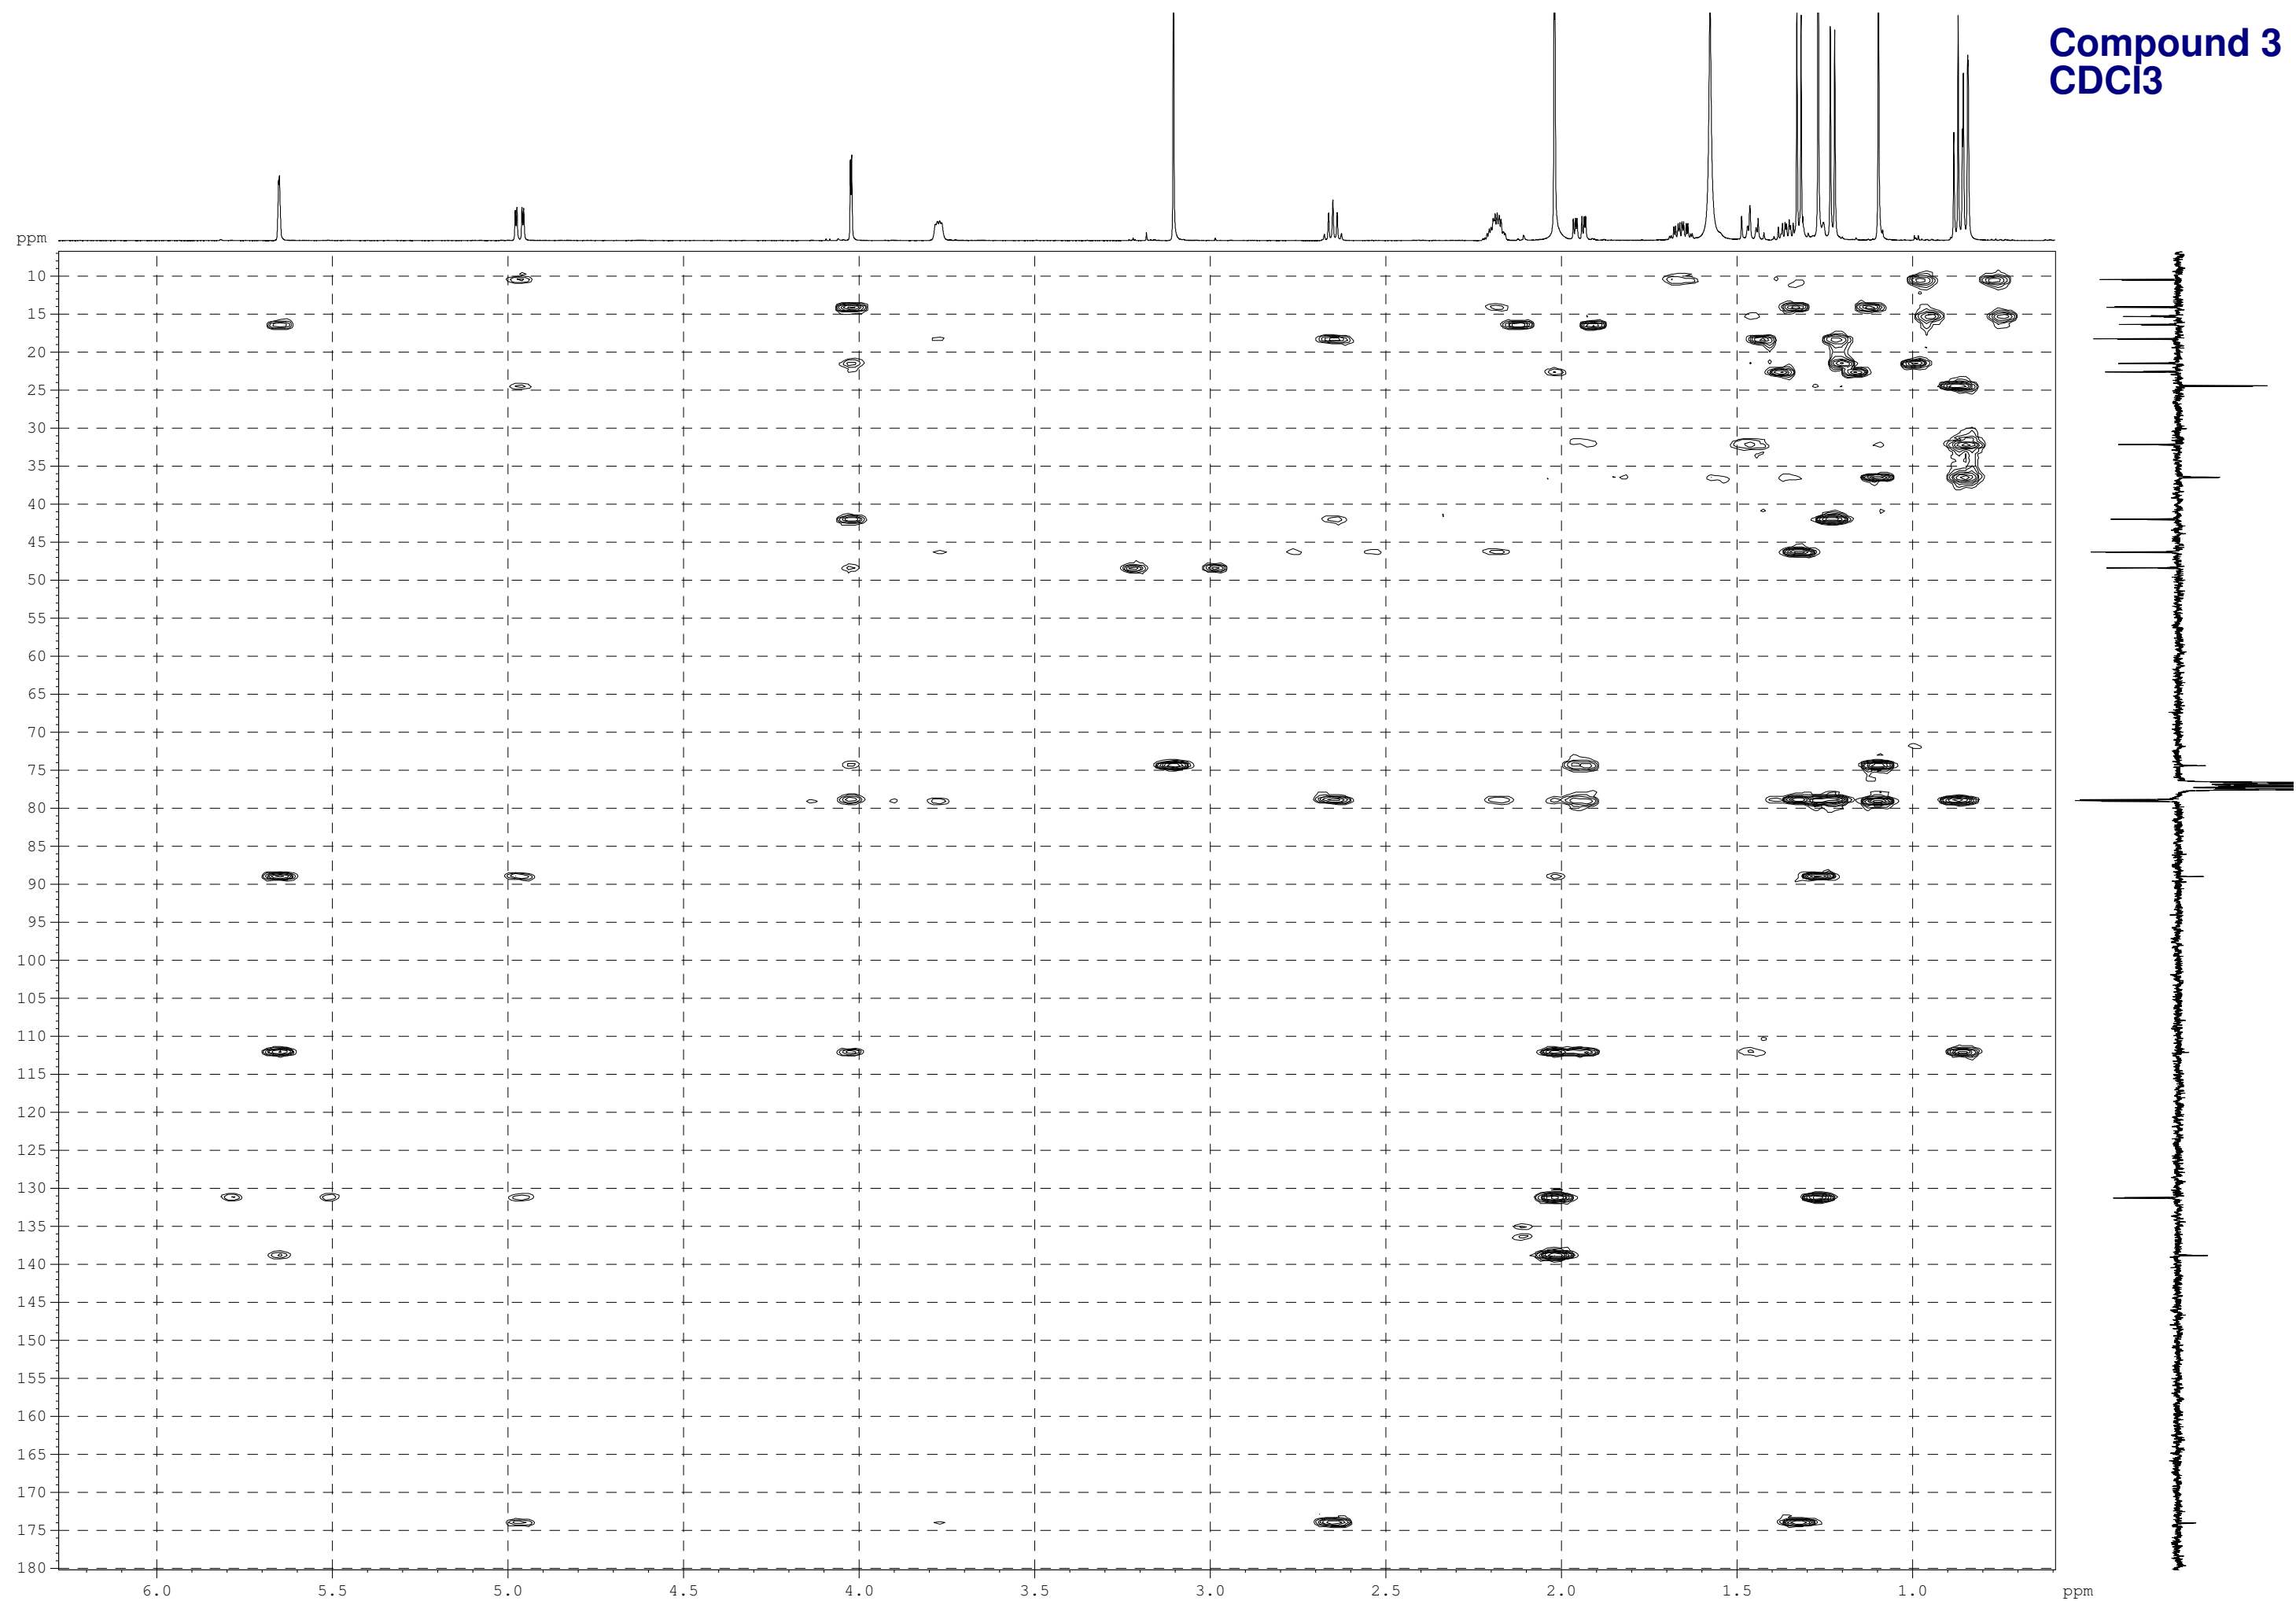

Supplement: Additional file 3 [file 1860-5397-11-157-S3.zip]

## Compound 4 DMSO

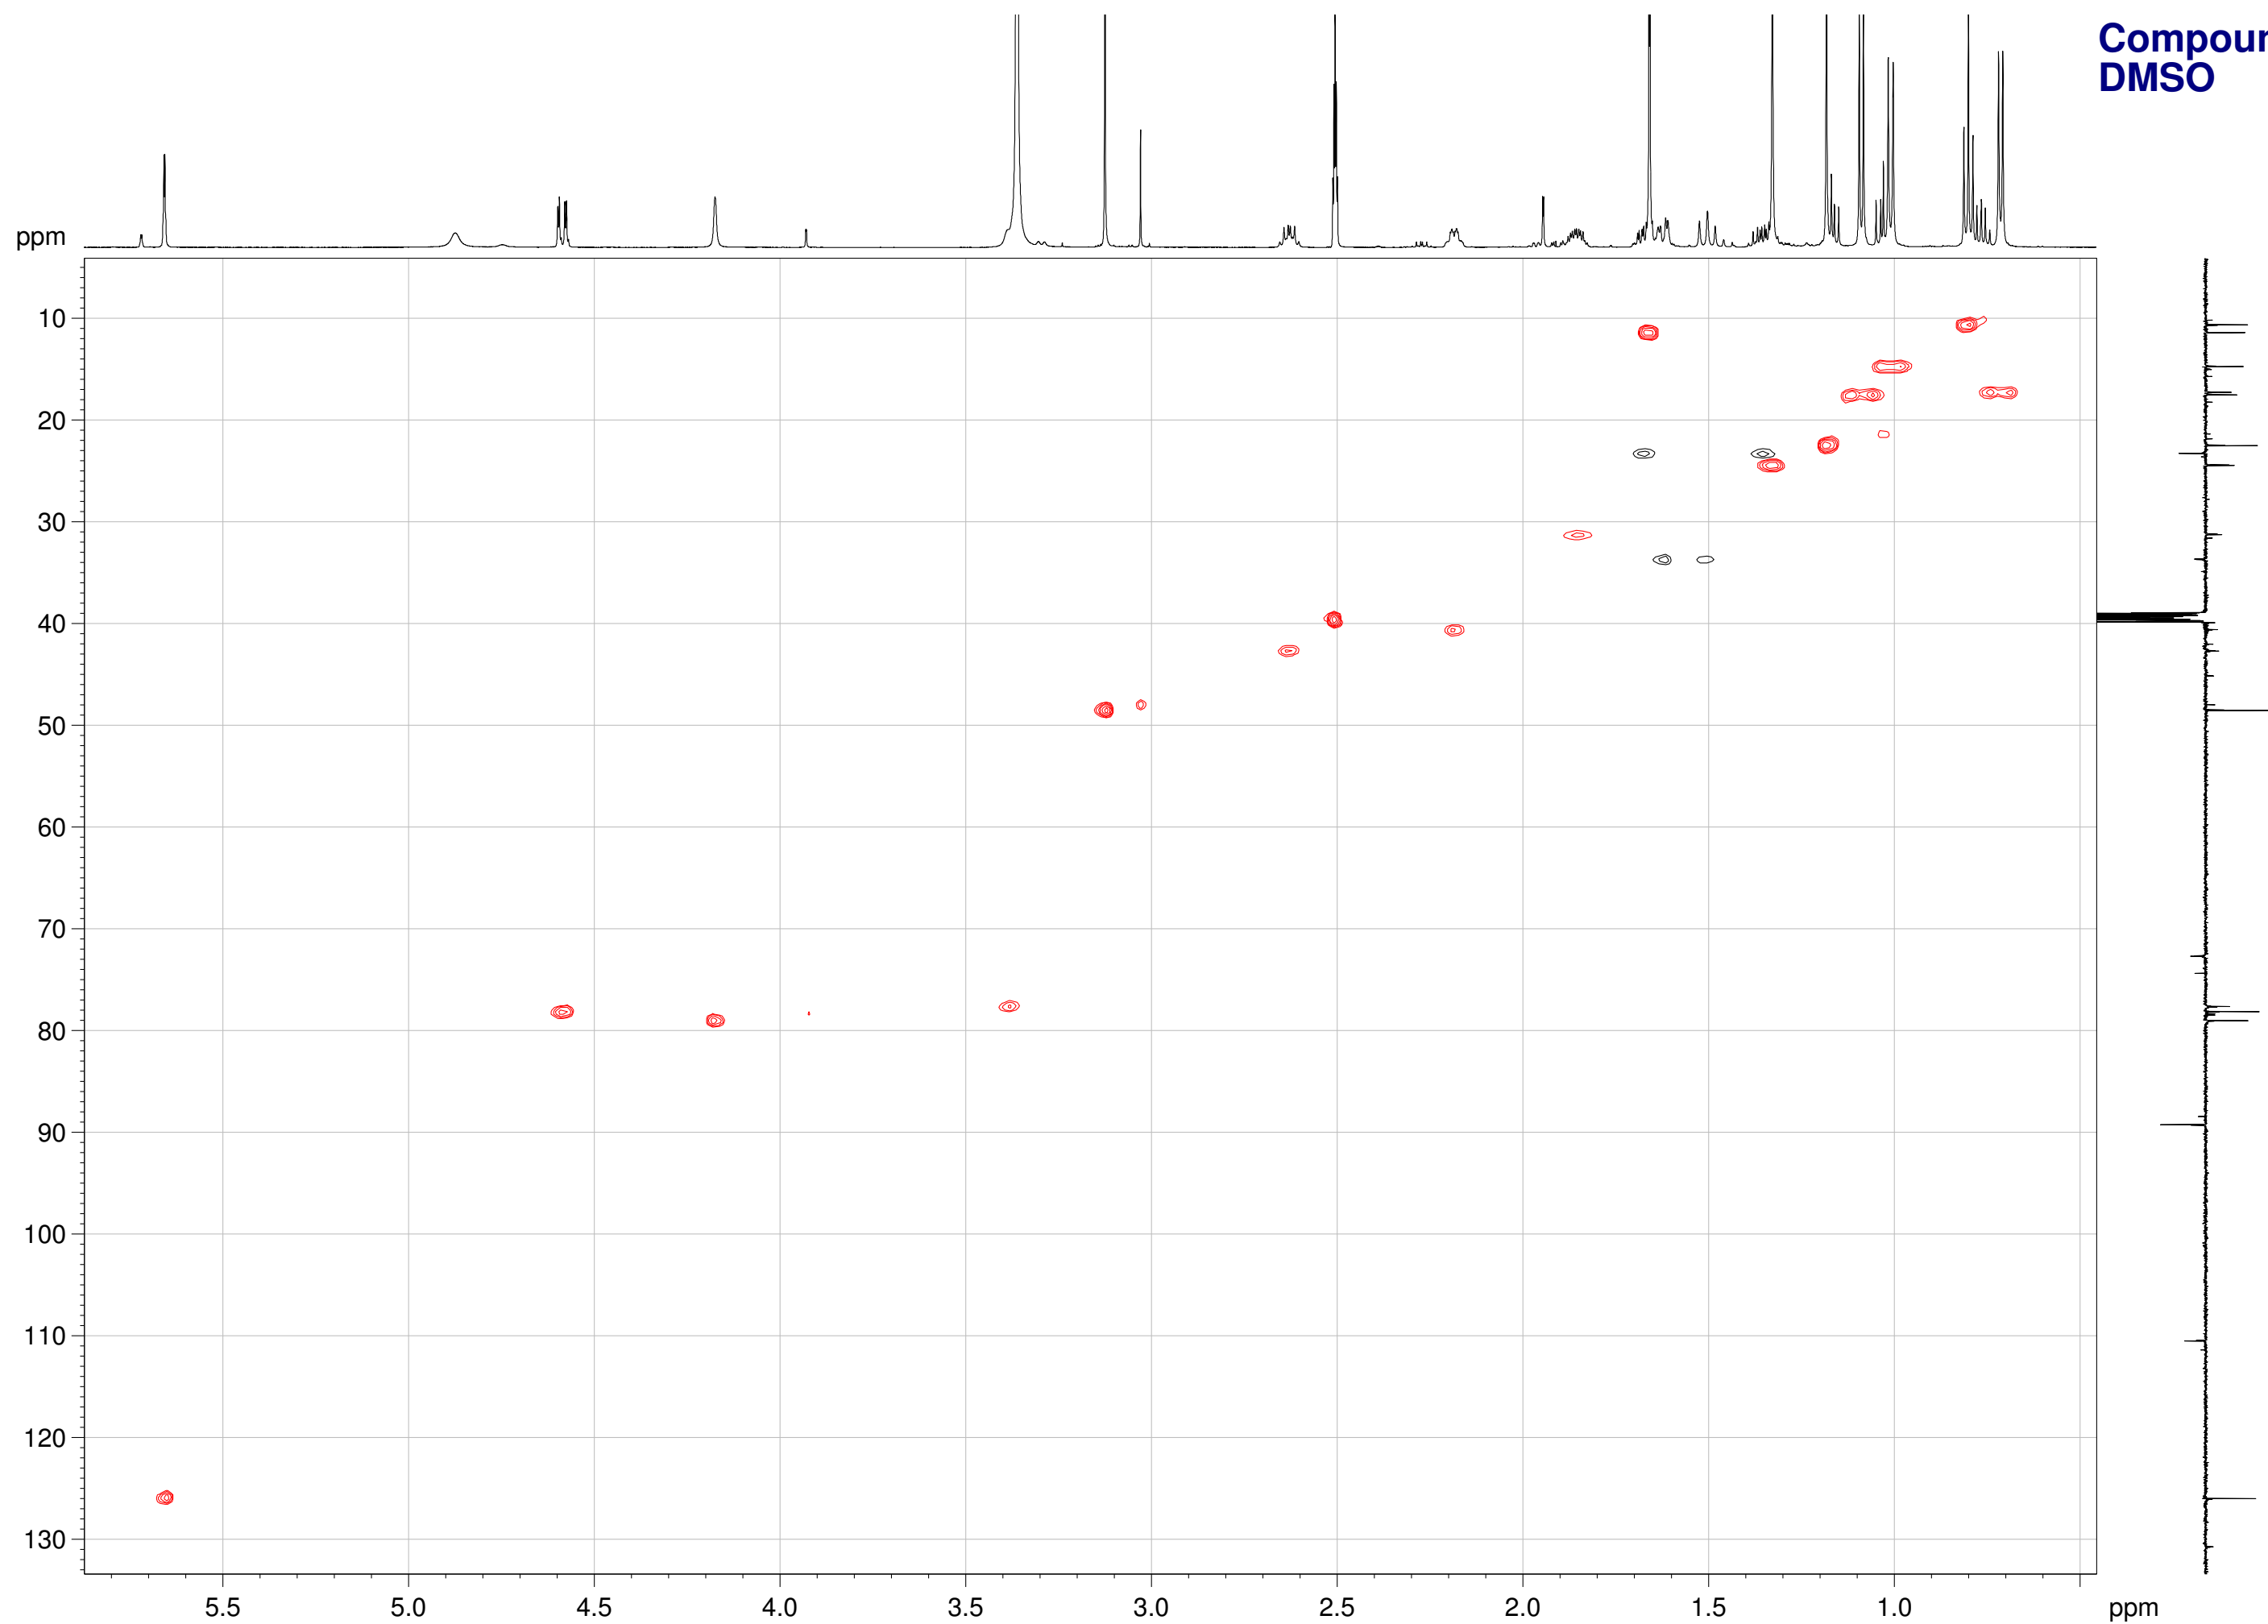

Supplement: Additional file 3 [file 1860-5397-11-157-S3.zip]

Compound 4  
DMSO

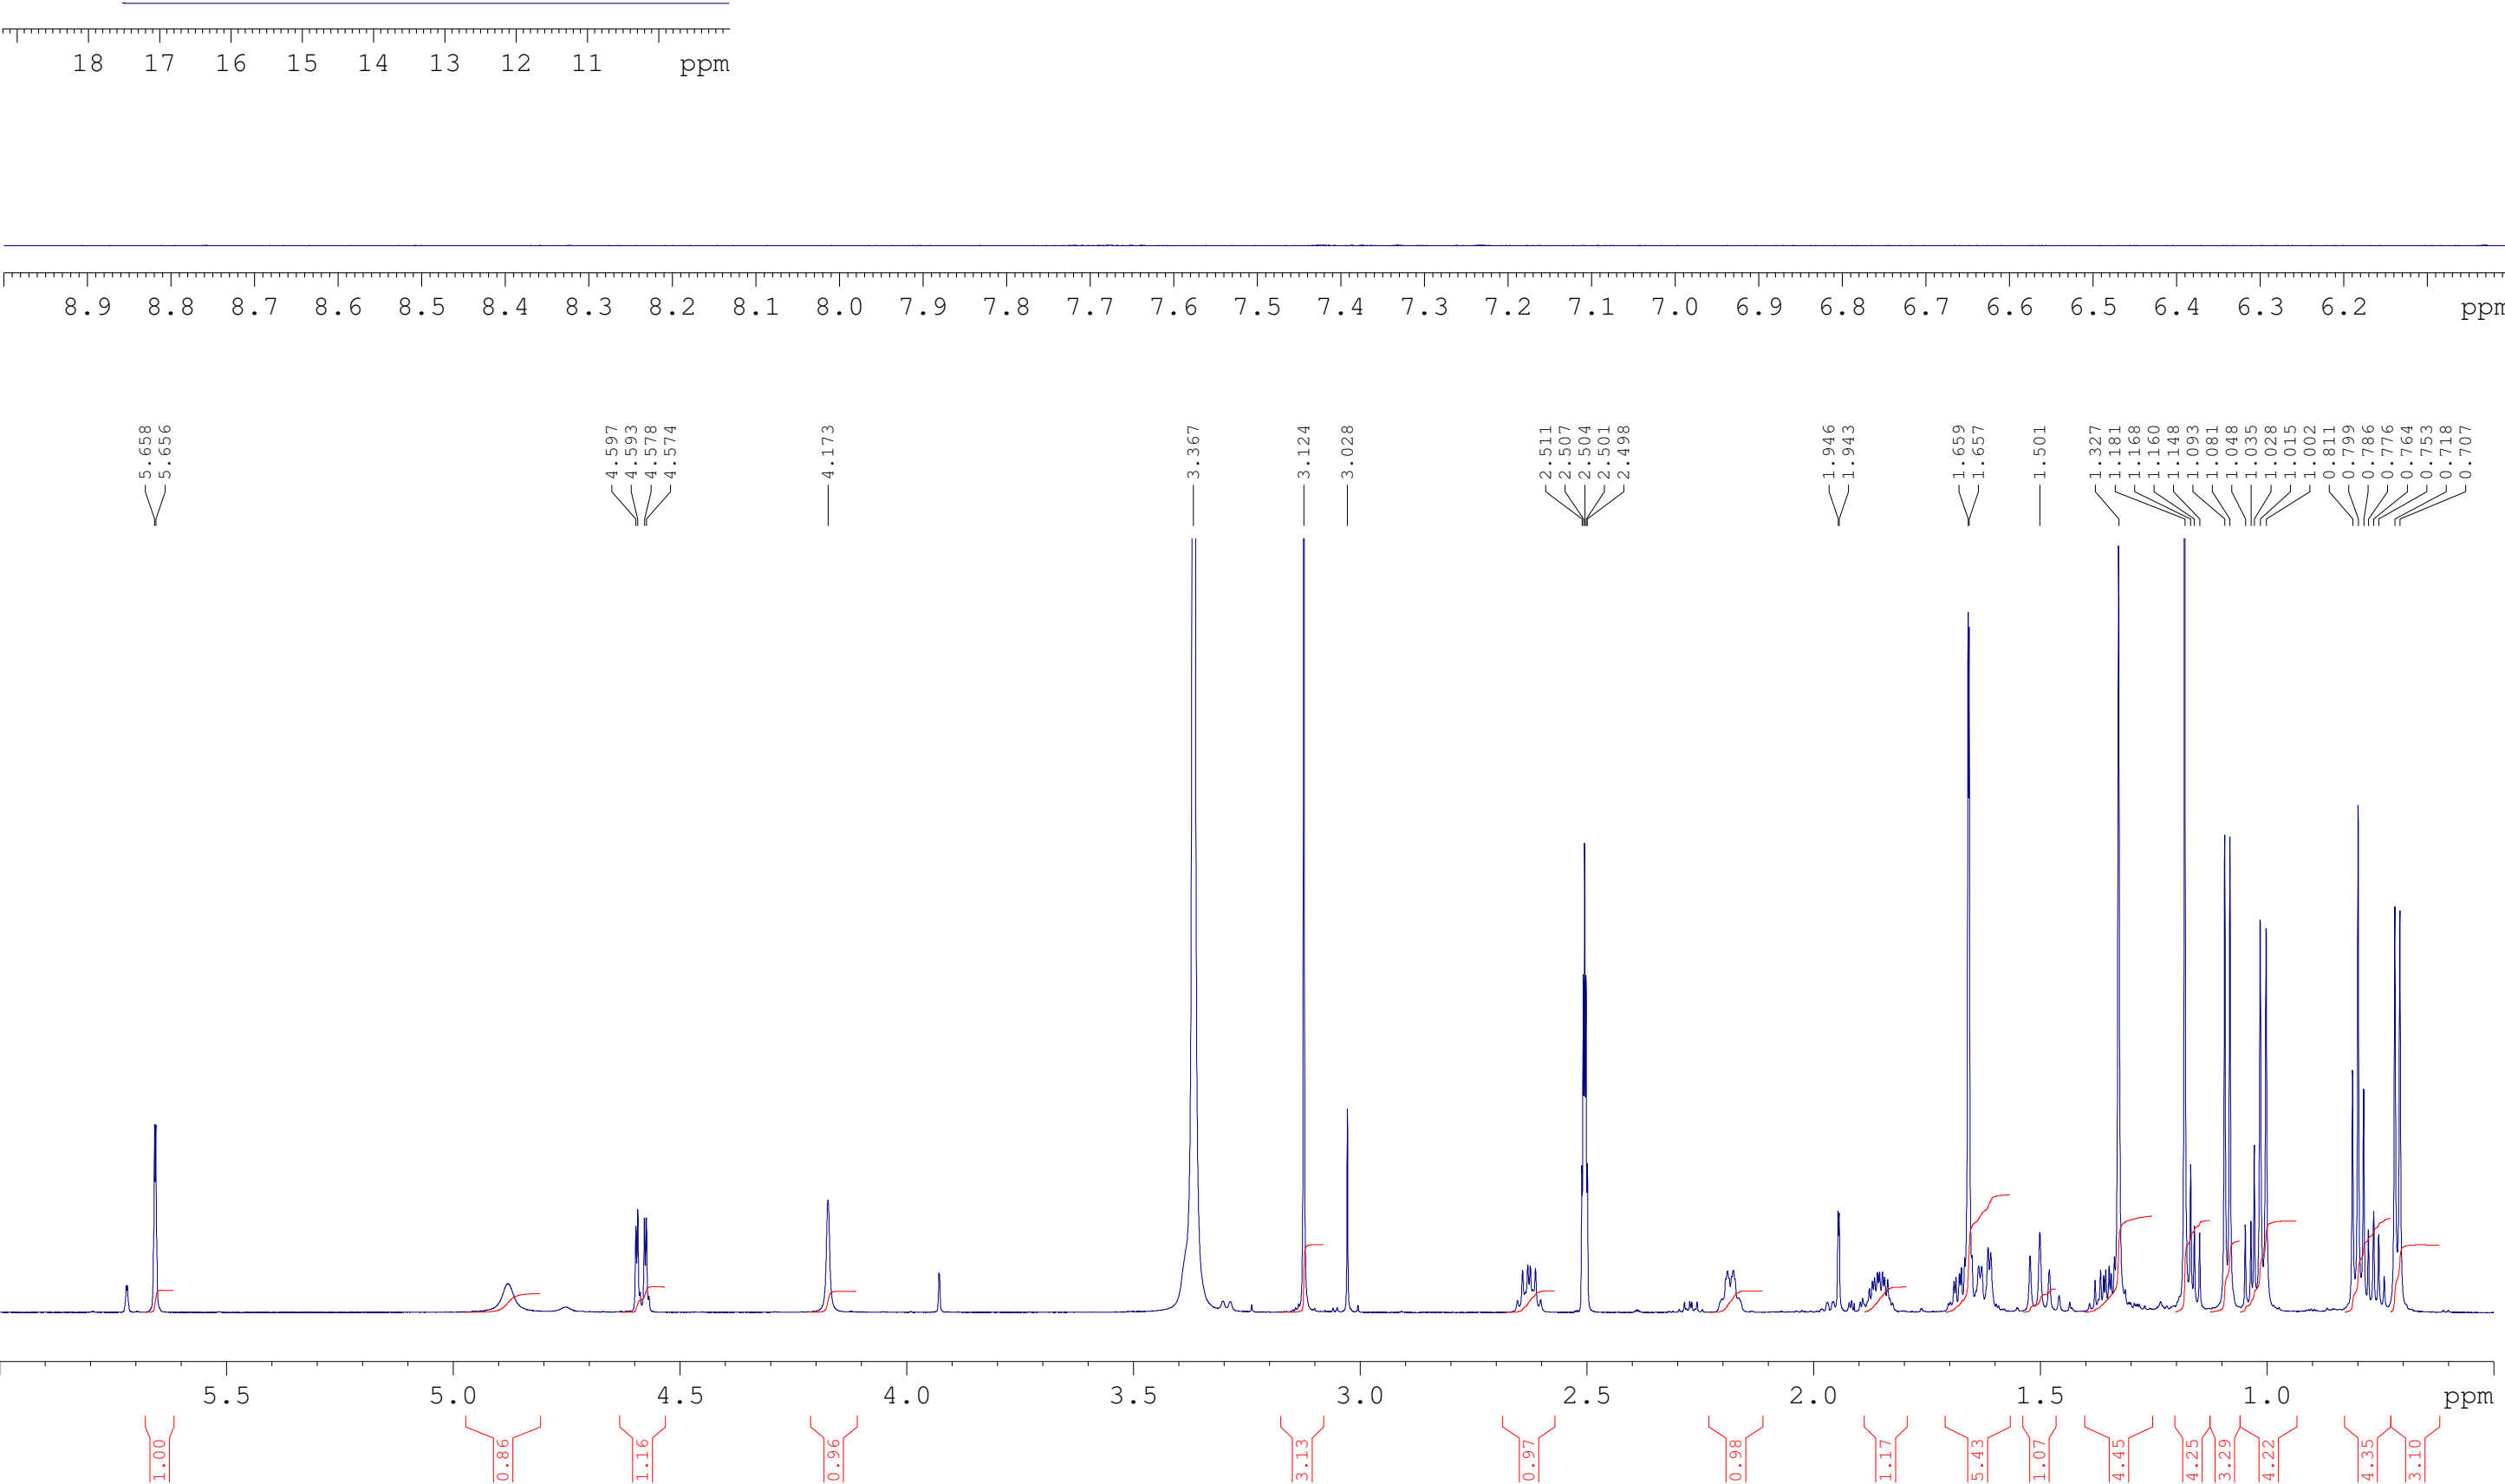

Supplement: Additional file 3 [file 1860-5397-11-157-S3.zip]

**Compounds  
2, 3 and 4  
in the mixture  
CDCl<sub>3</sub>**

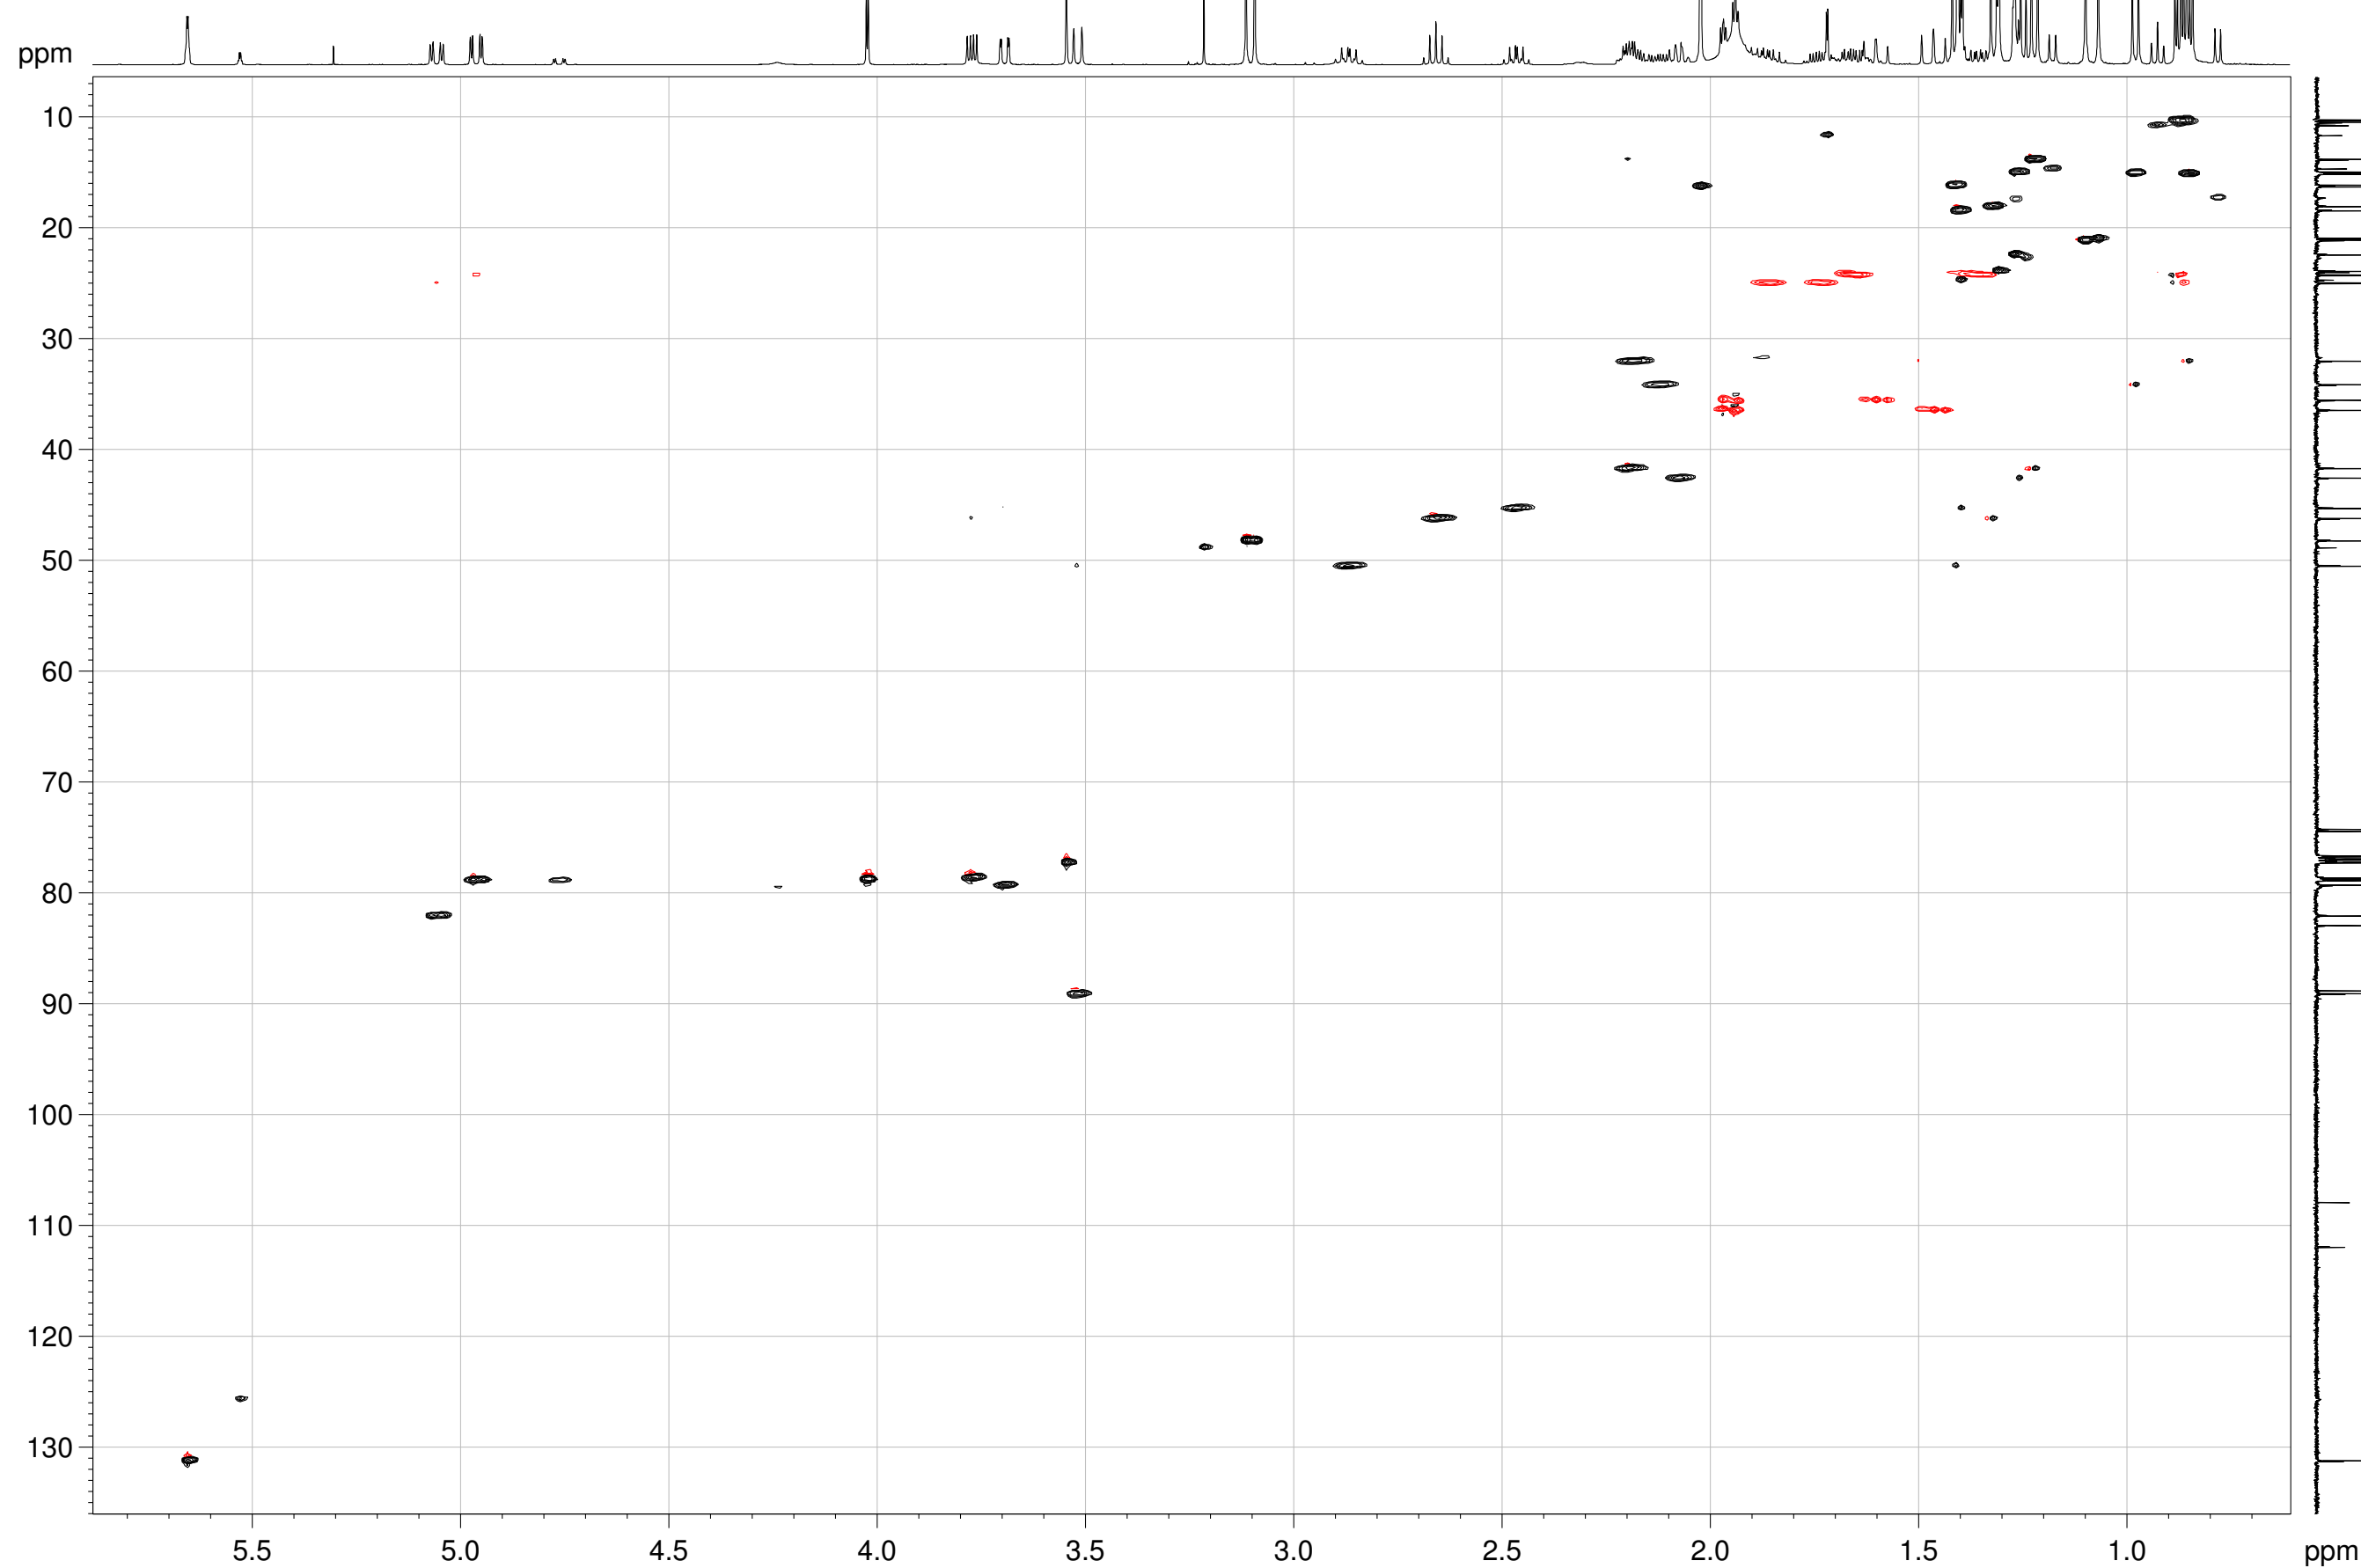

**Compounds  
2, 3 and 4  
in the mixture  
CDCl<sub>3</sub>**

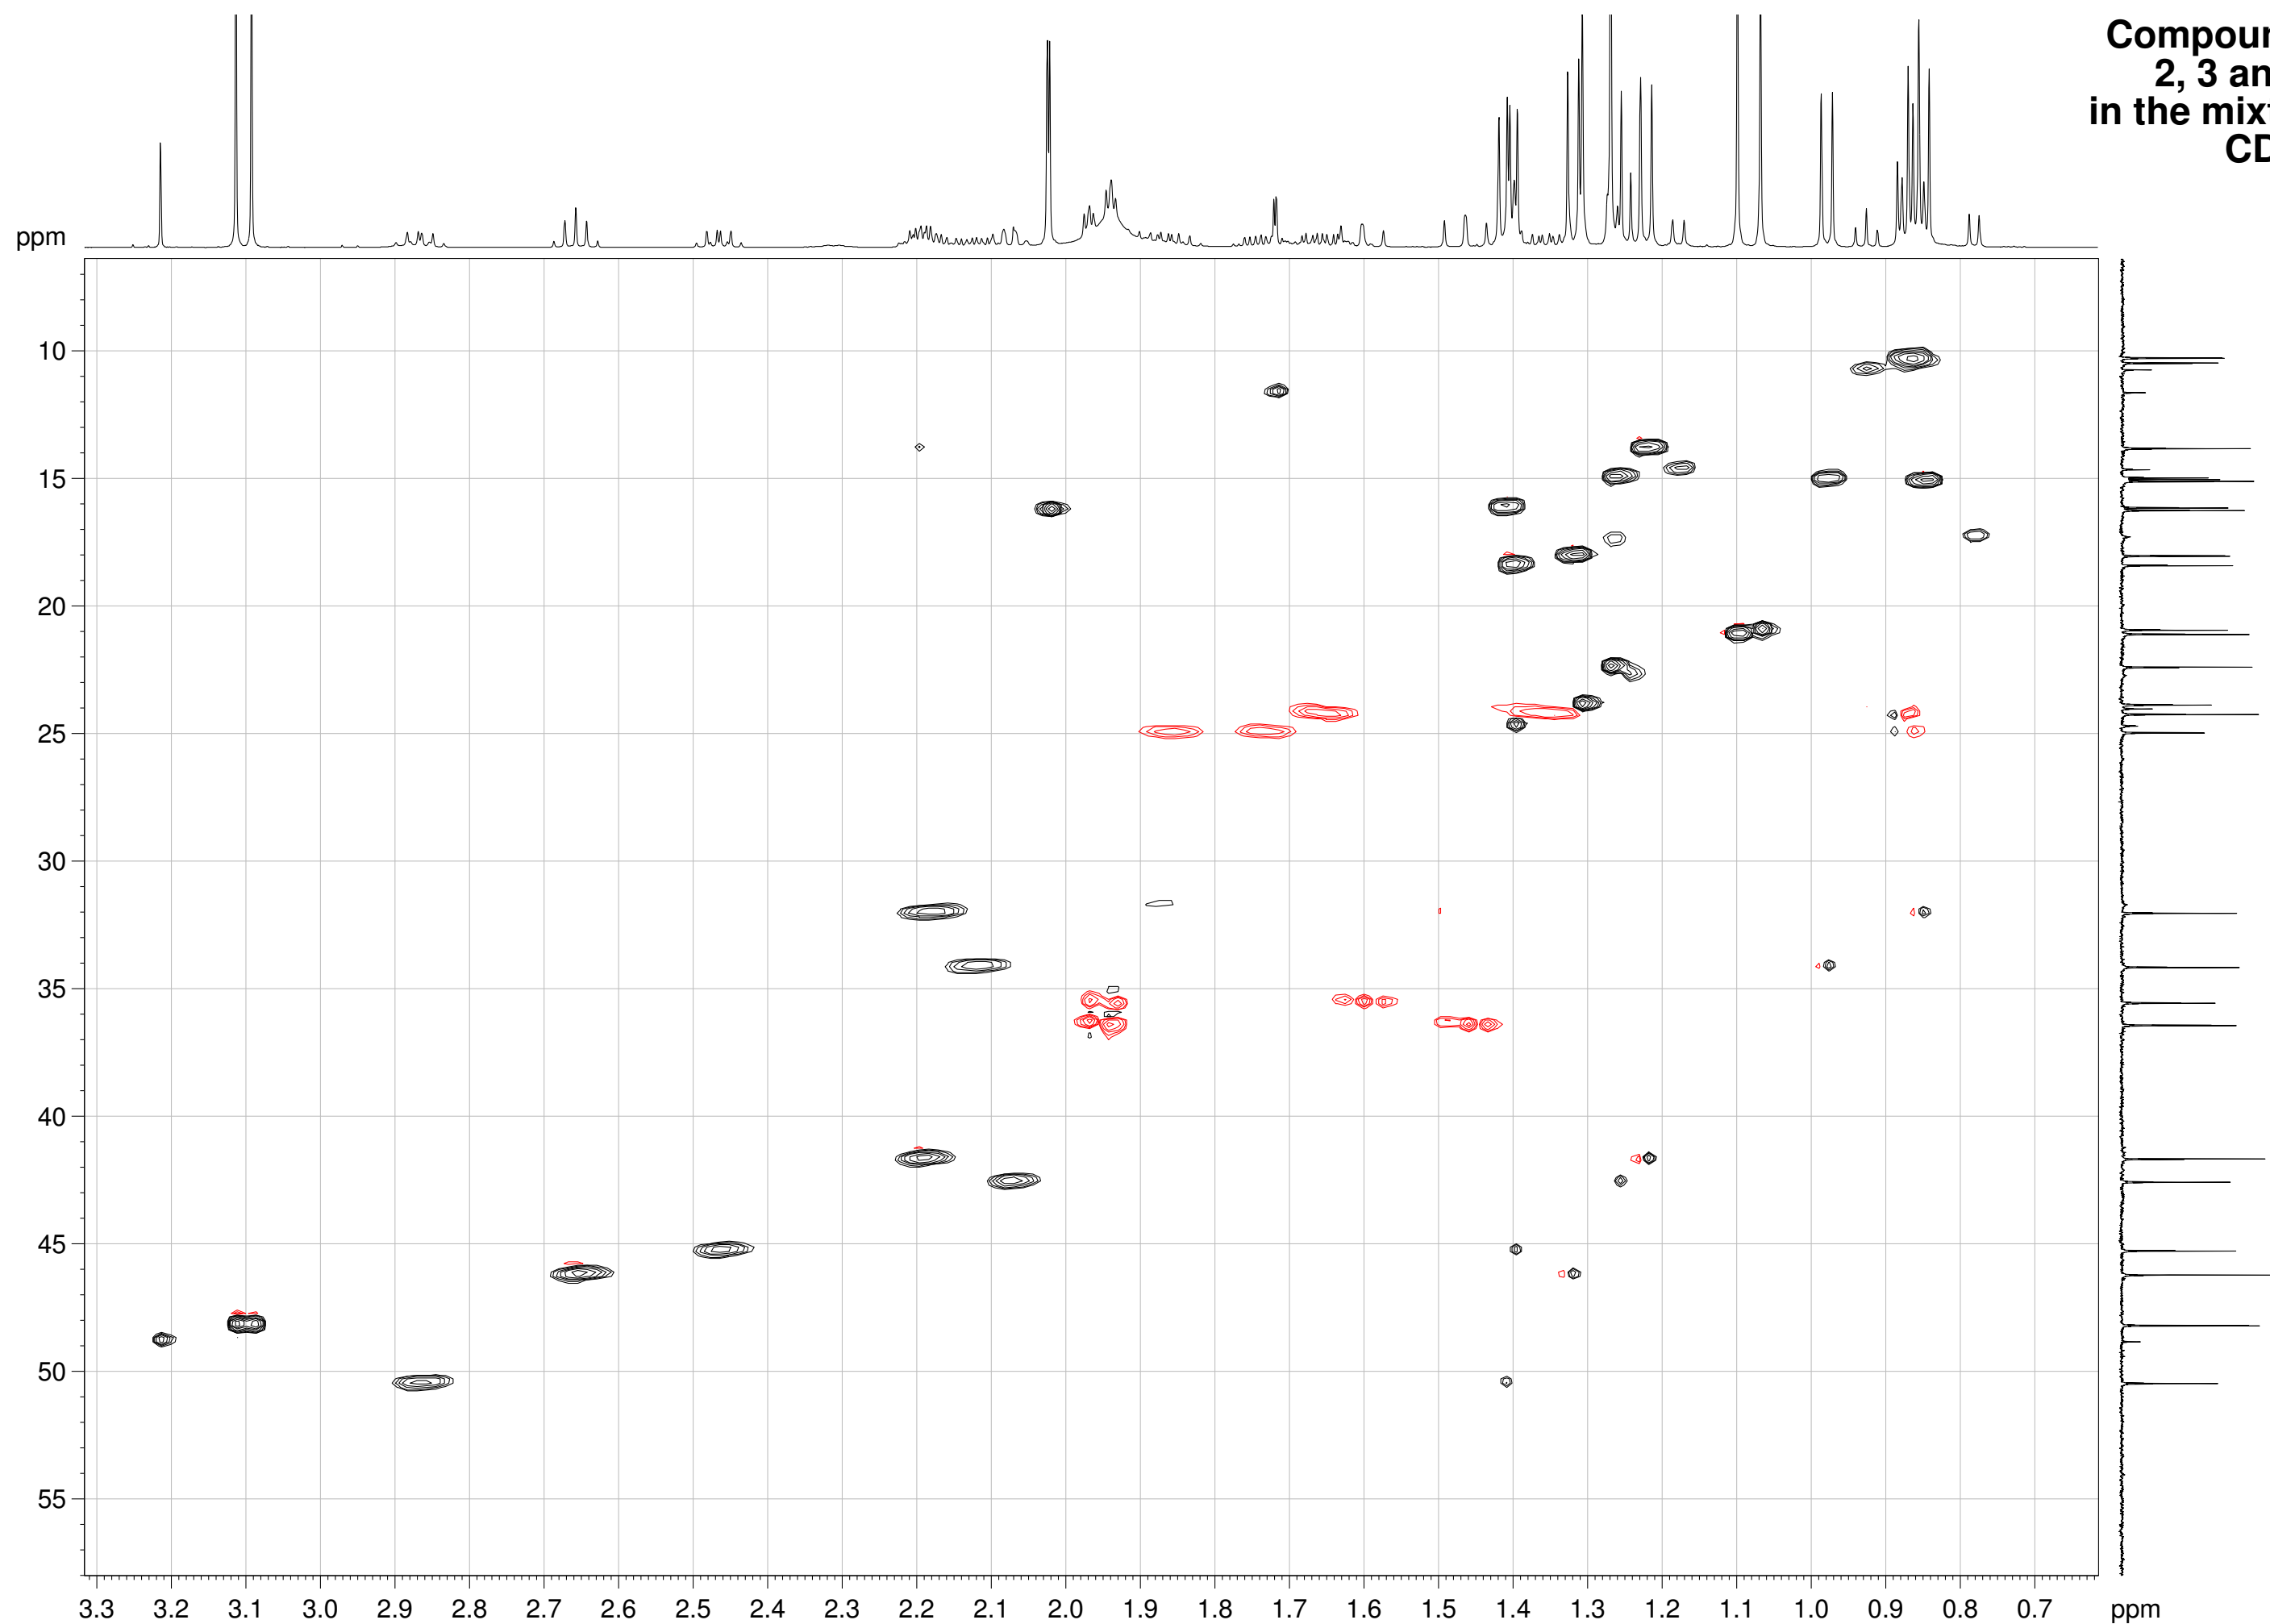

Supplement: Additional file 3 [file 1860-5397-11-157-S3.zip]

**Compound 4**  
**DMSO**

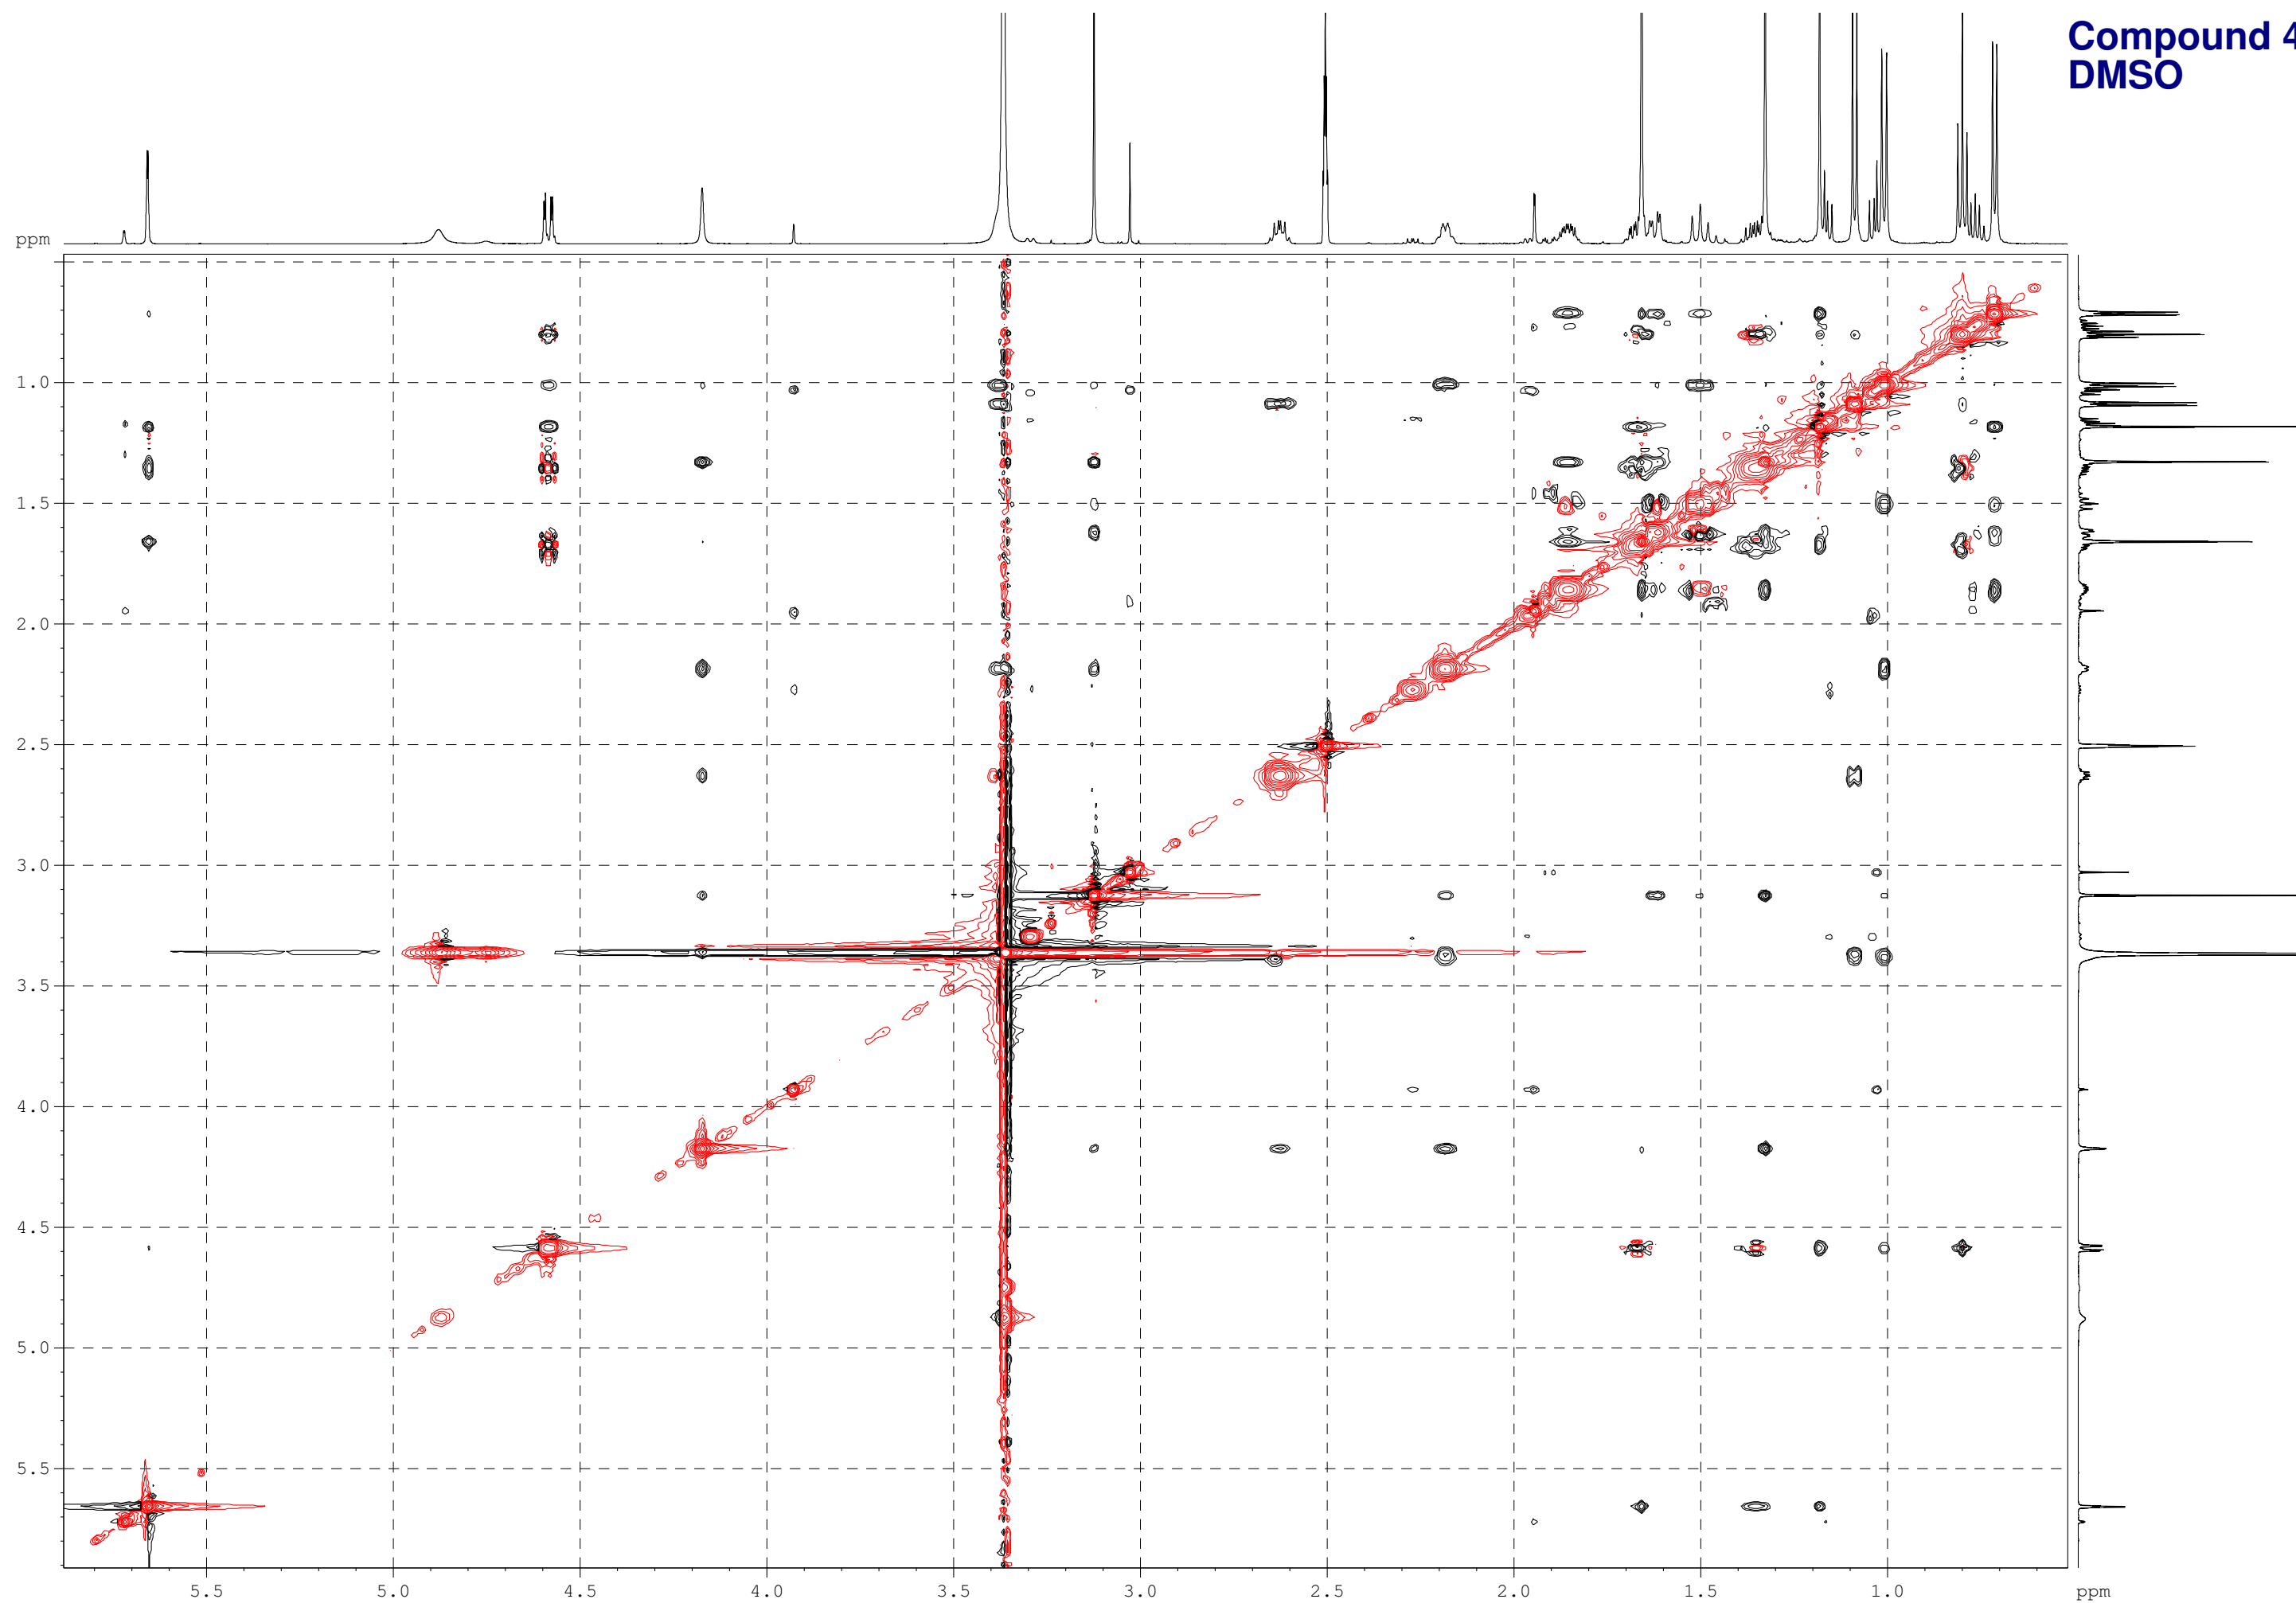

Supplement: Additional file 3 [file 1860-5397-11-157-S3.zip]

**Compound 2**  
**DMSO**

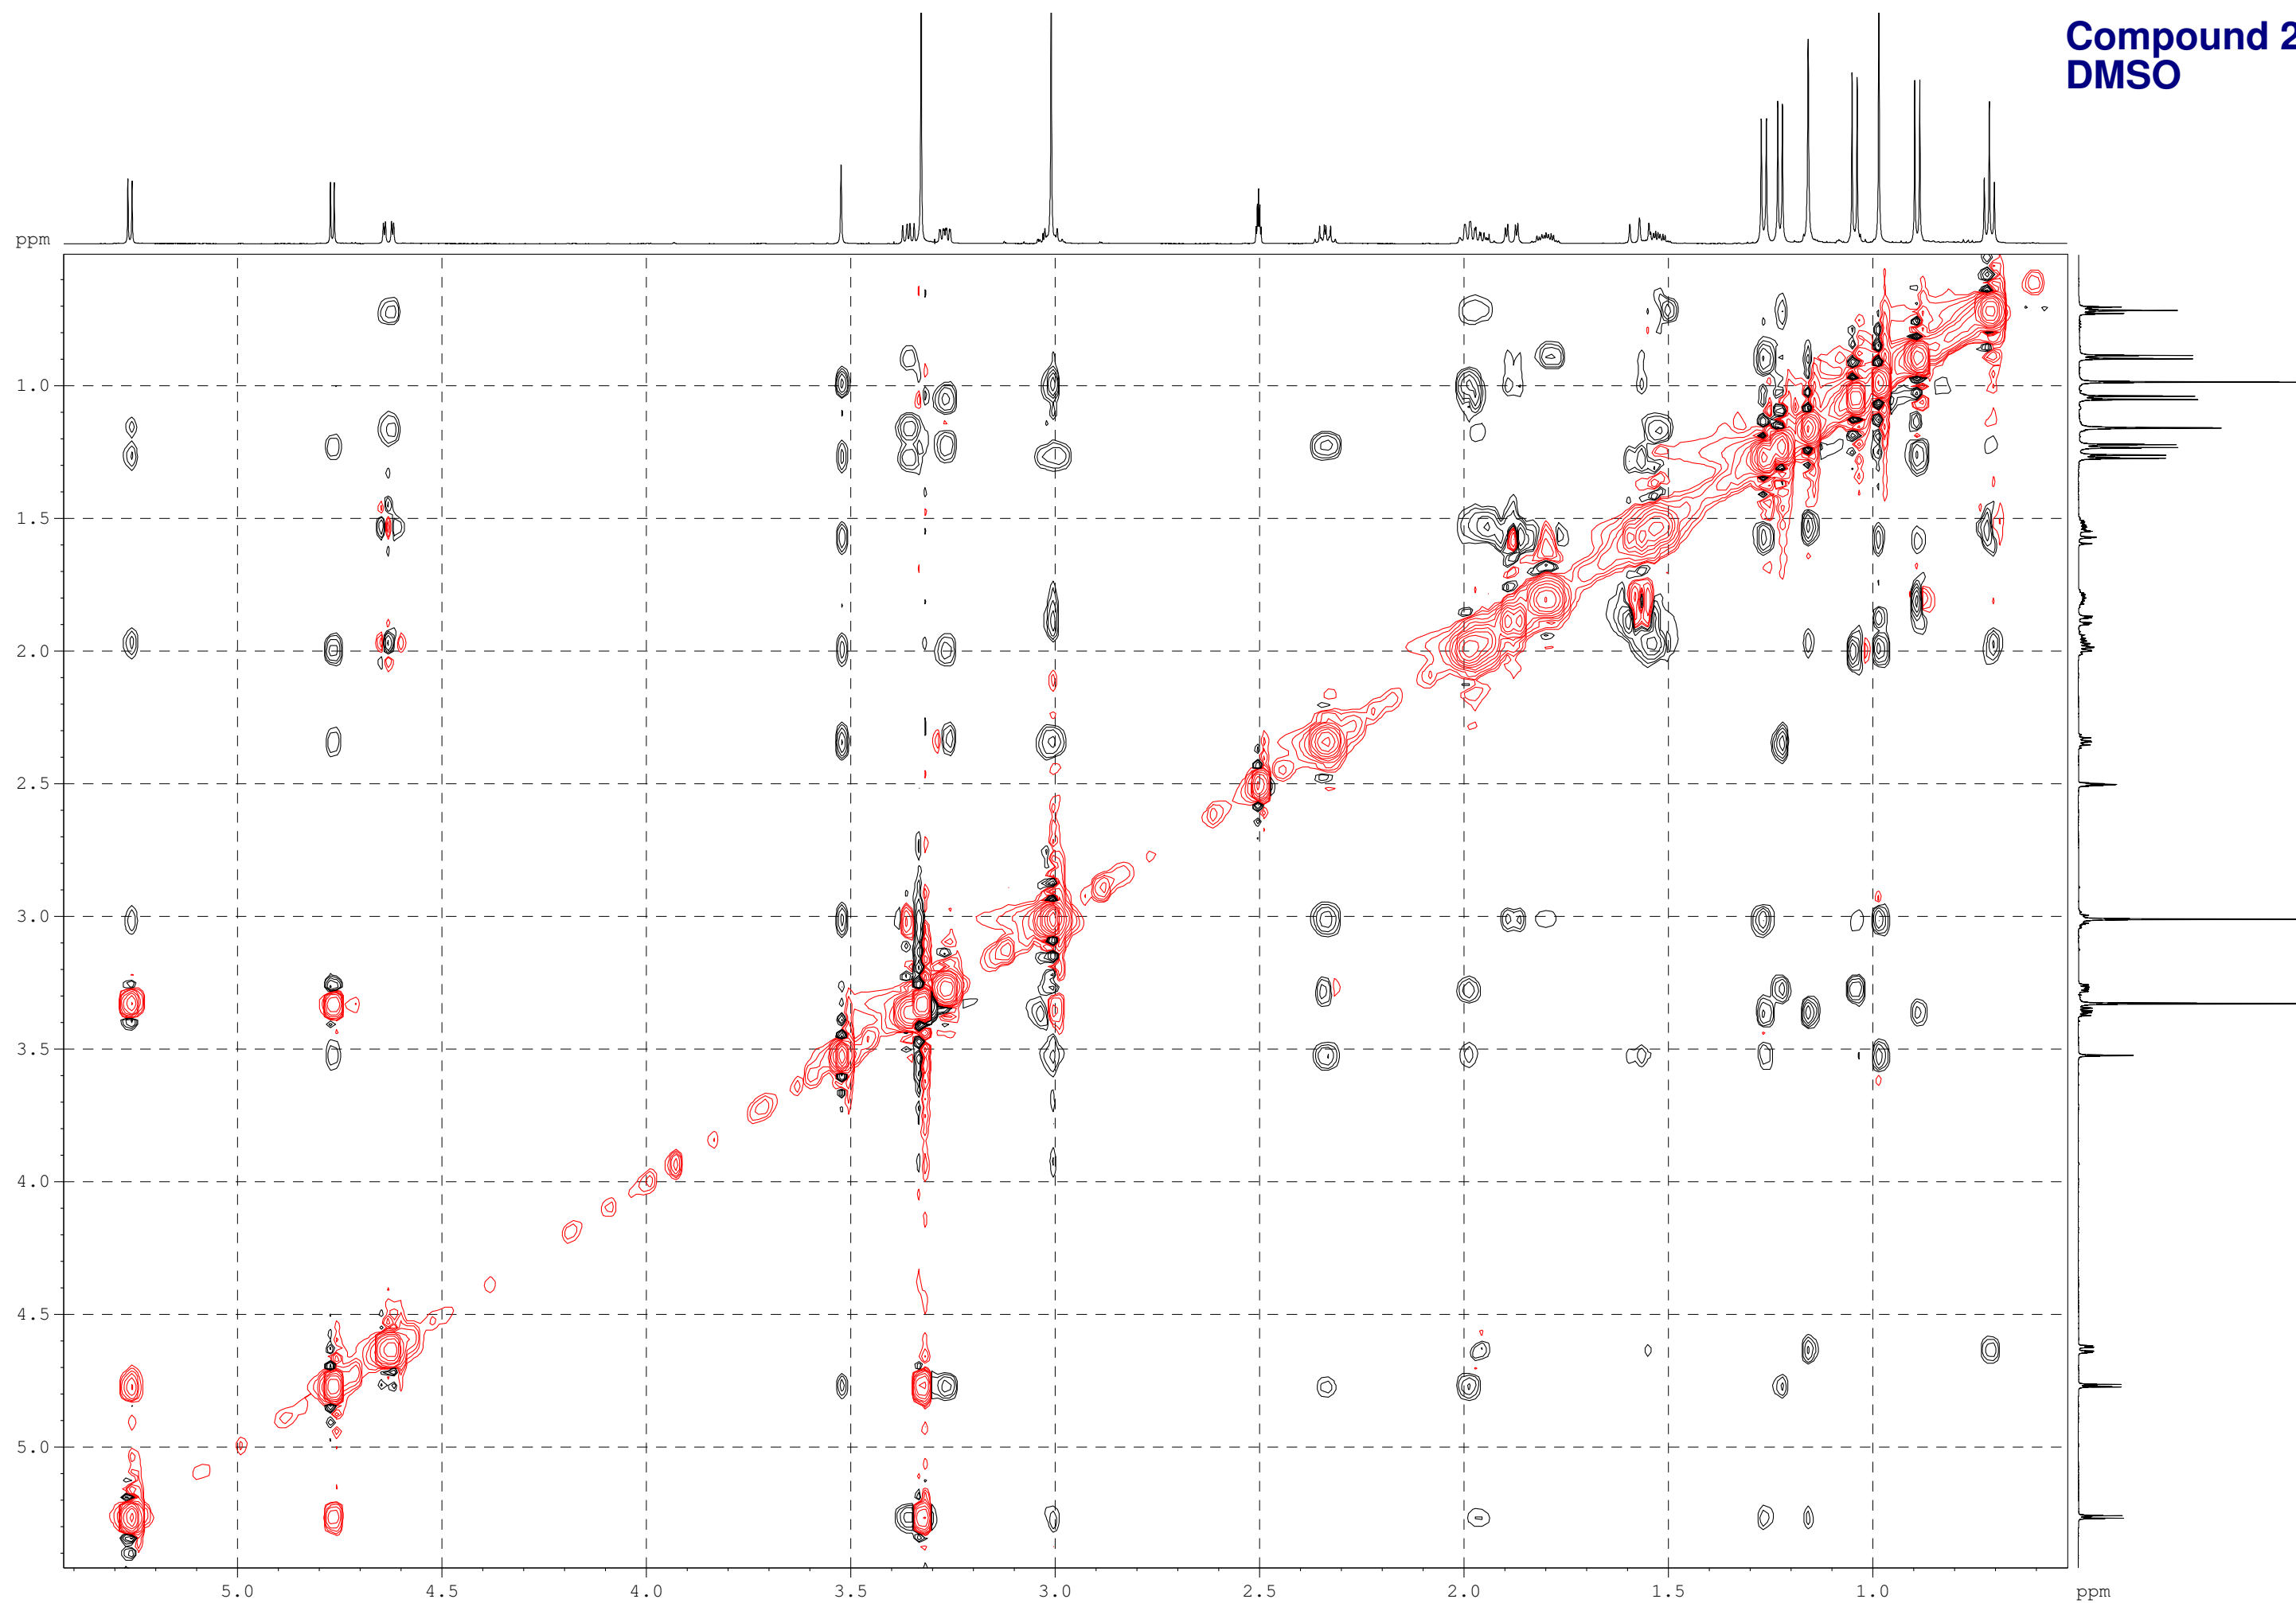

Supplement: Additional file 3 [file 1860-5397-11-157-S3.zip]
